# Supplementary material for: Damage-induced basal epithelial cell migration modulates the spatial organization of redox signaling and sensory neuron regeneration
Source: eLife. 2024 Aug 29;13:RP94995. doi: 10.7554/eLife.94995 (PMC11361710; doi:10.7554/eLife.94995)
Supplement: Appendix 1—figure 1—source data 1. [file elife-94995-app1-fig1-data1.xlsx]

## Sheet: Raw_Normalized
Condition	Rep	Time (hours post-wound)	n. fish	Normalized Density			*These data compare unwounded, untreated fish to fish treated with different drugs. Each rep is a group of fish that received treatment in the same dish at the same time. I would like to see comparisons between the control and drug conditions, not between different drugs themselves.
Control	1	24	1	1.23143
Control	1	24	1	0.984044
Control	1	24	1	0.906133
Control	1	24	1	0.980469
Control	1	24	1	0.877823
Control	1	24	1	1.0201
Control	2	24	1	1.02638
Control	2	24	1	0.868025
Control	2	24	1	1.01516
Control	2	24	1	0.96554
Control	2	24	1	1.1249
Control	3	24	1	1.05286
Control	3	24	1	1.11793
Control	3	24	1	1.0237
Control	3	24	1	0.785615
Control	3	24	1	0.986158
Control	3	24	1	1.03374
CK666	1	24	1	0.891407
CK666	1	24	1	0.853992
CK666	1	24	1	0.972869
CK666	1	24	1	1.34801
CK666	1	24	1	1.10164
CK666	1	24	1	1.15245
CK666	1	24	1	0.928499
CK666	1	24	1	1.03576
CK666	2	24	1	0.889672
CK666	2	24	1	1.0447
CK666	2	24	1	0.92684
CK666	2	24	1	0.881467
CK666	2	24	1	0.97784
CK666	3	24	1	0.835032
CK666	3	24	1	0.903357
CK666	3	24	1	0.848761
CK666	3	24	1	1.03886
CK666	3	24	1	0.954658
CK666	3	24	1	0.967783
CK666	3	24	1	1.01513
DPI	1	24	1	0.990565
DPI	1	24	1	0.834514
DPI	1	24	1	1.16877
DPI	1	24	1	1.12574
DPI	1	24	1	1.25997
DPI	1	24	1	0.928804
DPI	2	24	1	0.78627
DPI	2	24	1	0.773357
DPI	2	24	1	0.790127
DPI	2	24	1	0.889214
DPI	2	24	1	0.813161
DPI	3	24	1	0.75586
DPI	3	24	1	0.79683
DPI	3	24	1	0.934616
DPI	3	24	1	0.813113
