# Supplementary material for: Damage-induced basal epithelial cell migration modulates the spatial organization of redox signaling and sensory neuron regeneration
Source: eLife. 2024 Aug 29;13:RP94995. doi: 10.7554/eLife.94995 (PMC11361710; doi:10.7554/eLife.94995)
Supplement: Appendix 1—figure 1—source data 2. [file elife-94995-app1-fig1-data2.xlsx]

## Sheet: Sheet1
Condition	Rep	Time (hours post-wound)	n. fish	Normalized Density			*These data compare unwounded, untreated fish to fish treated with different drugs. Each rep is a group of fish that received treatment in the same dish at the same time. I would like to see comparisons between the control and drug conditions, not between different drugs themselves.
Control	1	24	1	1.23143
Control	1	24	1	0.984044
Control	1	24	1	0.906133
Control	1	24	1	0.980469
Control	1	24	1	0.877823
Control	1	24	1	1.0201
Control	2	24	1	1.02638
Control	2	24	1	0.868025
Control	2	24	1	1.01516
Control	2	24	1	0.96554
Control	2	24	1	1.1249
Control	3	24	1	1.05286
Control	3	24	1	1.11793
Control	3	24	1	1.0237
Control	3	24	1	0.785615
Control	3	24	1	0.986158
Control	3	24	1	1.03374
Isotonic	1	24	1	1.03699
Isotonic	1	24	1	1.11092
Isotonic	1	24	1	1.25131
Isotonic	1	24	1	1.22728
Isotonic	1	24	1	0.88772
Isotonic	1	24	1	0.959389
Isotonic	2	24	1	0.98436
Isotonic	2	24	1	0.989545
Isotonic	2	24	1	0.845419
Isotonic	2	24	1	0.72452
Isotonic	2	24	1	0.698196
Isotonic	3	24	1	0.898965
Isotonic	3	24	1	1.07712
Isotonic	3	24	1	1.07458
Isotonic	3	24	1	1.01315
Isotonic	3	24	1	0.717993
Isotonic	3	24	1	0.892854
