# Supplementary material for: Damage-induced basal epithelial cell migration modulates the spatial organization of redox signaling and sensory neuron regeneration
Source: eLife. 2024 Aug 29;13:RP94995. doi: 10.7554/eLife.94995 (PMC11361710; doi:10.7554/eLife.94995)
Supplement: Figure 1—source data 1. [file elife-94995-fig1-data1.xlsx]

## Sheet: Raw_Normalized
	Condition	Replicate	Time	Density
	Uninjured	1	24 h	1.06248
	Uninjured	1	24 h	0.950903
	Uninjured	1	24 h	0.926407
	Uninjured	1	24 h	1.04425
	Uninjured	1	24 h	0.963528
	Uninjured	1	24 h	0.948597
	Uninjured	1	24 h	0.857184
	Uninjured	2	24 h	1.10925
	Uninjured	2	24 h	1.05227
	Uninjured	2	24 h	1.04123
	Uninjured	2	24 h	0.96019
	Uninjured	2	24 h	1.17022
	Uninjured	2	24 h	0.997355
	Uninjured	2	24 h	0.973357
	Uninjured	2	24 h	0.983688
	Uninjured	2	24 h	0.906299
	Uninjured	3	24 h	1.02946
	Uninjured	3	24 h	1.06665
	Uninjured	3	24 h	1.13924
	Uninjured	3	24 h	0.974805
	Uninjured	3	24 h	0.873232
	Uninjured	3	24 h	0.969401
	Transect	1	24 h	0.857905
	Transect	1	24 h	0.966301
	Transect	1	24 h	0.83517
	Transect	1	24 h	0.846359
	Transect	1	24 h	0.954104
	Transect	1	24 h	0.942479
	Transect	1	24 h	0.742099
	Transect	2	24 h	0.820959
	Transect	2	24 h	0.786001
	Transect	2	24 h	0.828076
	Transect	2	24 h	0.797468
	Transect	2	24 h	0.96278
	Transect	2	24 h	0.891782
	Transect	2	24 h	0.939773
	Transect	2	24 h	1.09232
	Transect	2	24 h	1.06459
	Transect	3	24 h	0.946764
	Transect	3	24 h	0.830502
	Transect	3	24 h	0.895935
	Transect	3	24 h	1.05872
	Transect	3	24 h	0.927921
	Transect	3	24 h	0.810055
	Transect	3	24 h	0.910829
	Transect	3	24 h	0.78024
	Burn	1	24 h	0.525112
	Burn	1	24 h	0.562986
	Burn	1	24 h	0.703609
	Burn	1	24 h	0.479842
	Burn	1	24 h	0.630018
	Burn	1	24 h	0.596068
	Burn	1	24 h	0.772519
	Burn	2	24 h	0.402673
	Burn	2	24 h	0.526984
	Burn	2	24 h	0.769184
	Burn	2	24 h	0.932609
	Burn	2	24 h	0.656221
	Burn	2	24 h	0.596269
	Burn	2	24 h	0.567516
	Burn	2	24 h	0.502221
	Burn	2	24 h	0.527816
	Burn	3	24 h	0.654267
	Burn	3	24 h	0.632212
	Burn	3	24 h	0.722969
	Burn	3	24 h	0.754002
	Burn	3	24 h	0.694021
	Burn	3	24 h	0.671218
	Burn	3	24 h	0.682762
	Burn	3	24 h	0.704303
	Burn	3	24 h	0.733193
	Burn	3	24 h	0.564618
	Uninjured	1	48 h	1.22917
	Uninjured	1	48 h	1.29913
	Uninjured	1	48 h	0.834108
	Uninjured	1	48 h	1.16367
	Uninjured	1	48 h	1.03986
	Uninjured	1	48 h	1.17362
	Uninjured	1	48 h	0.94977
	Uninjured	1	48 h	1.2374
	Uninjured	1	48 h	1.08258
	Uninjured	1	48 h	1.11352
	Uninjured	2	48 h	0.882423
	Uninjured	2	48 h	0.979075
	Uninjured	2	48 h	1.09204
	Uninjured	2	48 h	1.00376
	Uninjured	2	48 h	0.864767
	Uninjured	2	48 h	0.872111
	Uninjured	2	48 h	0.745913
	Uninjured	2	48 h	0.943221
	Uninjured	3	48 h	0.883735
	Uninjured	3	48 h	0.816666
	Uninjured	3	48 h	0.868643
	Uninjured	3	48 h	1.0654
	Uninjured	3	48 h	1.08265
	Uninjured	3	48 h	0.948241
	Uninjured	3	48 h	0.828547
	Transect	1	48 h	0.831095
	Transect	1	48 h	0.733274
	Transect	1	48 h	0.669862
	Transect	1	48 h	0.860348
	Transect	1	48 h	1.05682
	Transect	1	48 h	1.05412
	Transect	1	48 h	0.932603
	Transect	1	48 h	1.23322
	Transect	1	48 h	0.90981
	Transect	1	48 h	0.954967
	Transect	1	48 h	1.30632
	Transect	2	48 h	0.954795
	Transect	2	48 h	0.74787
	Transect	2	48 h	0.80655
	Transect	2	48 h	0.615187
	Transect	2	48 h	0.782147
	Transect	2	48 h	0.740426
	Transect	2	48 h	0.976617
	Transect	3	48 h	0.710471
	Transect	3	48 h	0.760911
	Transect	3	48 h	0.749243
	Transect	3	48 h	0.761944
	Transect	3	48 h	0.863387
	Transect	3	48 h	0.794259
	Transect	3	48 h	0.819938
	Transect	3	48 h	0.888215
	Burn	1	48 h	0.382052
	Burn	1	48 h	0.523908
	Burn	1	48 h	0.353868
	Burn	1	48 h	0.557019
	Burn	1	48 h	0.329862
	Burn	1	48 h	0.877585
	Burn	1	48 h	0.822696
	Burn	1	48 h	0.797395
	Burn	1	48 h	0.854503
	Burn	1	48 h	0.805513
	Burn	1	48 h	0.512063
	Burn	2	48 h	0.464841
	Burn	2	48 h	0.598729
	Burn	2	48 h	0.577529
	Burn	2	48 h	0.502212
	Burn	2	48 h	0.578684
	Burn	2	48 h	0.543799
	Burn	2	48 h	0.456425
	Burn	2	48 h	0.791014
	Burn	2	48 h	0.739585
	Burn	2	48 h	0.401575
	Burn	3	48 h	0.616362
	Burn	3	48 h	0.580337
	Burn	3	48 h	0.676857
	Burn	3	48 h	0.597647
	Burn	3	48 h	0.504013
	Burn	3	48 h	0.599832
	Burn	3	48 h	0.558178
	Uninjured	1	72 h	0.870729
	Uninjured	1	72 h	0.932501
	Uninjured	1	72 h	0.815928
	Uninjured	1	72 h	0.806808
	Uninjured	1	72 h	0.980603
	Uninjured	1	72 h	0.902538
	Uninjured	1	72 h	1.00083
	Uninjured	1	72 h	1.10719
	Uninjured	1	72 h	1.00049
	Uninjured	1	72 h	1.19625
	Uninjured	1	72 h	1.25809
	Uninjured	2	72 h	0.767803
	Uninjured	2	72 h	0.850104
	Uninjured	2	72 h	0.901294
	Uninjured	2	72 h	0.577155
	Uninjured	3	72 h	1.03205
	Uninjured	3	72 h	0.997544
	Uninjured	3	72 h	1.01804
	Uninjured	3	72 h	1.0765
	Uninjured	3	72 h	1.109
	Uninjured	3	72 h	1.07648
	Uninjured	3	72 h	1.21698
	Uninjured	3	72 h	1.41338
	Uninjured	3	72 h	1.01537
	Uninjured	3	72 h	1.07636
	Transect	1	72 h	0.702038
	Transect	1	72 h	0.906432
	Transect	1	72 h	1.02023
	Transect	1	72 h	1.18946
	Transect	1	72 h	1.19495
	Transect	1	72 h	1.25
	Transect	1	72 h	1.26063
	Transect	1	72 h	1.03763
	Transect	1	72 h	1.22997
	Transect	2	72 h	0.756446
	Transect	2	72 h	0.849628
	Transect	2	72 h	0.692648
	Transect	2	72 h	0.854541
	Transect	2	72 h	0.706328
	Transect	3	72 h	0.867201
	Transect	3	72 h	0.841975
	Transect	3	72 h	0.661004
	Transect	3	72 h	0.873587
	Transect	3	72 h	0.836898
	Transect	3	72 h	0.888131
	Transect	3	72 h	0.593234
	Transect	3	72 h	0.816104
	Transect	3	72 h	1.0591
	Transect	3	72 h	1.01366
	Transect	3	72 h	0.809923
	Burn	1	72 h	0.599234
	Burn	1	72 h	0.752348
	Burn	1	72 h	0.652976
	Burn	1	72 h	0.740337
	Burn	1	72 h	0.638029
	Burn	1	72 h	0.724137
	Burn	1	72 h	0.986508
	Burn	1	72 h	0.785366
	Burn	1	72 h	0.721527
	Burn	1	72 h	0.766498
	Burn	2	72 h	0.213753
	Burn	2	72 h	0.249819
	Burn	2	72 h	0.256213
	Burn	2	72 h	0.372798
	Burn	3	72 h	0.598012
	Burn	3	72 h	0.652196
	Burn	3	72 h	0.730893
	Burn	3	72 h	0.583
	Burn	3	72 h	0.616689
	Burn	3	72 h	0.553024
	Burn	3	72 h	0.471788
	Burn	3	72 h	0.632261
	Burn	3	72 h	0.701033
	Uninjured	1	96 h	0.979493
	Uninjured	1	96 h	1.35697
	Uninjured	1	96 h	1.01302
	Uninjured	1	96 h	1.09611
	Uninjured	1	96 h	1.15827
	Uninjured	1	96 h	1.14845
	Uninjured	1	96 h	0.944907
	Uninjured	2	96 h	0.979493
	Uninjured	2	96 h	0.700591
	Uninjured	2	96 h	0.887731
	Uninjured	2	96 h	0.832906
	Uninjured	2	96 h	1.03955
	Uninjured	3	96 h	0.842521
	Uninjured	3	96 h	1.05389
	Uninjured	3	96 h	1.02956
	Uninjured	3	96 h	0.89767
	Uninjured	3	96 h	0.986893
	Uninjured	3	96 h	1.01813
	Uninjured	3	96 h	1.11037
	Uninjured	3	96 h	0.923487
	Transect	1	96 h	1.14849
	Transect	1	96 h	1.21959
	Transect	1	96 h	0.783327
	Transect	1	96 h	1.40181
	Transect	1	96 h	1.14857
	Transect	2	96 h	1.14849
	Transect	2	96 h	1.01283
	Transect	2	96 h	0.743742
	Transect	2	96 h	0.796379
	Transect	2	96 h	0.89306
	Transect	3	96 h	0.94303
	Transect	3	96 h	0.803724
	Transect	3	96 h	0.659073
	Transect	3	96 h	0.975841
	Transect	3	96 h	0.967444
	Transect	3	96 h	1.00996
	Transect	3	96 h	0.999065
	Transect	3	96 h	1.08617
	Transect	3	96 h	1.19755
	Transect	3	96 h	0.968171
	Transect	3	96 h	0.695789
	Transect	3	96 h	0.945194
	Burn	1	96 h	0.994508
	Burn	1	96 h	0.769032
	Burn	1	96 h	0.861256
	Burn	1	96 h	1.12765
	Burn	1	96 h	0.985072
	Burn	1	96 h	0.771261
	Burn	1	96 h	1.02096
	Burn	2	96 h	0.380963
	Burn	2	96 h	0.389841
	Burn	2	96 h	0.415632
	Burn	2	96 h	0.384825
	Burn	2	96 h	0.472146
	Burn	2	96 h	0.595959
	Burn	2	96 h	0.477936
	Burn	3	96 h	0.594427
	Burn	3	96 h	0.561041
	Burn	3	96 h	0.632942
	Burn	3	96 h	0.679154
	Burn	3	96 h	0.64827
	Burn	3	96 h	0.417158
	Burn	3	96 h	0.67776
	Burn	3	96 h	0.573278
	Burn	3	96 h	0.651651
	Burn	3	96 h	0.538282
