# Supplementary material for: Damage-induced basal epithelial cell migration modulates the spatial organization of redox signaling and sensory neuron regeneration
Source: eLife. 2024 Aug 29;13:RP94995. doi: 10.7554/eLife.94995 (PMC11361710; doi:10.7554/eLife.94995)
Supplement: Figure 1—source data 2. [file elife-94995-fig1-data2.xlsx]

## Sheet: Ngn1 U,T,B Escape
Condition	Time	Replicate	n. fish	n respond		This experiment is seeing if fish uninjured, mechanically injured, or burned have a response to being poked. This is checked from 24-96 hours after injury, with new fish each time. I would like to compare between experimental conditions both within timepoints and between timepoints.
Uninjured	24 h	1	10	10
Uninjured	24 h	2	10	10
Uninjured	24 h	3	10	10
Uninjured	24 h	4	10	9
Transect	24 h	1	10	10
Transect	24 h	2	10	9
Transect	24 h	3	10	10
Transect	24 h	4	10	10
Burn	24 h	1	10	0
Burn	24 h	2	10	0
Burn	24 h	3	10	0
Burn	24 h	4	10	0
Uninjured	48 h	1	10	10
Uninjured	48 h	2	10	10
Uninjured	48 h	3	10	10
Uninjured	48 h	4	10	10
Transect	48 h	1	10	9
Transect	48 h	2	10	10
Transect	48 h	3	10	10
Transect	48 h	4	10	10
Burn	48 h	1	10	2
Burn	48 h	2	10	3
Burn	48 h	3	10	2
Burn	48 h	4	10	4
Uninjured	72 h	1	10	9
Uninjured	72 h	2	10	10
Uninjured	72 h	3	10	10
Uninjured	72 h	4	10	10
Transect	72 h	1	10	10
Transect	72 h	2	10	10
Transect	72 h	3	10	10
Transect	72 h	4	10	10
Burn	72 h	1	10	6
Burn	72 h	2	10	5
Burn	72 h	3	10	5
Burn	72 h	4	10	7
Uninjured	96 h	1	10	8
Uninjured	96 h	2	10	8
Uninjured	96 h	3	8	7
Uninjured	96 h	4	8	8
Transect	96 h	1	8	8
Transect	96 h	2	8	7
Transect	96 h	3	8	7
Transect	96 h	4	8	8
Burn	96 h	1	8	7
Burn	96 h	2	8	8
Burn	96 h	3	8	8
Burn	96 h	4	8	6
