# Supplementary material for: Damage-induced basal epithelial cell migration modulates the spatial organization of redox signaling and sensory neuron regeneration
Source: eLife. 2024 Aug 29;13:RP94995. doi: 10.7554/eLife.94995 (PMC11361710; doi:10.7554/eLife.94995)
Supplement: Figure 1—source data 3. [file elife-94995-fig1-data3.xlsx]

## Sheet: Damage Area
Condition	Rep	Time (hours post-wound)	n. fish	Damage Area			These data compare the amount of axon damage in transected fish to burned fish. Each rep is a group of fish that received treatment in the same dish at the same time. I would like to see comparisons between conditions.
Transect	1	6	1	224
Transect	1	6	1	303.111
Transect	1	6	1	513.333
Transect	1	6	1	297.333
Transect	1	6	1	257.778
Transect	1	6	1	165.778
Transect	1	6	1	191.556
Transect	1	6	1	339.556
Transect	2	6	1	548.889
Transect	2	6	1	207.556
Transect	2	6	1	548.889
Transect	2	6	1	554.222
Transect	2	6	1	506.667
Burn	1	6	1	2184.44
Burn	1	6	1	2718.67
Burn	1	6	1	1671.56
Burn	1	6	1	2292.89
Burn	1	6	1	3246.22
Burn	1	6	1	1959.56
Burn	1	6	1	1806.22
Burn	1	6	1	1677.78
Burn	1	6	1	1938.22
Burn	2	6	1	2852.44
Burn	2	6	1	2470.22
Burn	2	6	1	2168.44
Burn	2	6	1	1904.89
Burn	2	6	1	2148
Burn	2	6	1	1851.11
