# Supplementary material for: Damage-induced basal epithelial cell migration modulates the spatial organization of redox signaling and sensory neuron regeneration
Source: eLife. 2024 Aug 29;13:RP94995. doi: 10.7554/eLife.94995 (PMC11361710; doi:10.7554/eLife.94995)
Supplement: Figure 2—source data 1. [file elife-94995-fig2-data1.xlsx]

## Sheet: Raw_Normalized
Condition	Rep	Time (hours post-wound)	n. fish	Normalized Density			These data compare fish mechanically injured vs. burned at different time points. Each rep is a group of fish that received treatment in the same dish at the same time. I would like to see comparisons between conditions in time points (Early vs. Early / Late vs. Late).
B/T Early	1	24	1	1.04298
B/T Early	1	24	1	0.582002
B/T Early	1	24	1	1.32451
B/T Early	1	24	1	1.27653
B/T Early	1	24	1	1.09088
B/T Early	2	24	1	1.01412
B/T Early	2	24	1	0.919384
B/T Early	2	24	1	0.922962
B/T Early	2	24	1	1.16839
B/T Early	2	24	1	1.01013
B/T Early	2	24	1	1.11095
B/T Early	2	24	1	1.28596
B/T Early	2	24	1	1.01341
B/T Early	2	24	1	1.04189
B/T Early	3	24	1	0.849558
B/T Early	3	24	1	0.922688
B/T Early	3	24	1	1.14281
B/T Early	3	24	1	1.1217
B/T Early	3	24	1	1.17602
B/T Early	3	24	1	0.883998
B/T Early	3	24	1	1.16136
B/T Early	4	24	1	1.08752
B/T Early	4	24	1	1.30661
B/T Early	4	24	1	1.01807
B/T Early	4	24	1	1.00096
B/T Early	4	24	1	1.10383
B/T Early	4	24	1	1.13575
B/T Early	4	24	1	1.21387
B/T Early	4	24	1	1.06689
B/T Early	4	24	1	1.19958
T/T Early	1	24	1	0.94324
T/T Early	1	24	1	1.09334
T/T Early	1	24	1	1.19389
T/T Early	1	24	1	1.07739
T/T Early	1	24	1	1.04942
T/T Early	2	24	1	1.24018
T/T Early	2	24	1	1.00174
T/T Early	2	24	1	0.96527
T/T Early	2	24	1	0.96995
T/T Early	2	24	1	1.0628
T/T Early	2	24	1	0.998355
T/T Early	2	24	1	1.26615
T/T Early	2	24	1	1.14293
T/T Early	3	24	1	1.02379
T/T Early	3	24	1	0.904096
T/T Early	3	24	1	1.04532
T/T Early	3	24	1	0.846118
T/T Early	3	24	1	0.618753
T/T Early	3	24	1	0.852488
T/T Early	3	24	1	0.932512
T/T Early	3	24	1	0.878684
T/T Early	4	24	1	1.03193
T/T Early	4	24	1	0.814674
T/T Early	4	24	1	1.15325
T/T Early	4	24	1	0.958454
T/T Early	4	24	1	0.984032
T/T Early	4	24	1	1.13628
T/T Early	4	24	1	0.97697
T/T Early	4	24	1	0.933258
T/T Early	4	24	1	0.98155
T/T Early	4	24	1	0.923204
B/T Late	1	24	1	0.620038
B/T Late	1	24	1	0.850009
B/T Late	1	24	1	0.828141
B/T Late	1	24	1	0.983584
B/T Late	2	24	1	0.816504
B/T Late	2	24	1	0.967309
B/T Late	2	24	1	0.968059
B/T Late	2	24	1	0.9489
B/T Late	2	24	1	0.998203
B/T Late	2	24	1	0.933053
B/T Late	2	24	1	0.868609
B/T Late	2	24	1	0.78596
B/T Late	2	24	1	0.922117
B/T Late	2	24	1	0.954366
B/T Late	2	24	1	0.661614
B/T Late	3	24	1	0.784862
B/T Late	3	24	1	0.512527
B/T Late	3	24	1	0.692135
B/T Late	3	24	1	0.694195
B/T Late	3	24	1	0.733983
B/T Late	3	24	1	0.389865
B/T Late	3	24	1	0.646002
B/T Late	3	24	1	0.67653
B/T Late	4	24	1	0.569563
B/T Late	4	24	1	0.683918
B/T Late	4	24	1	0.823684
B/T Late	4	24	1	0.889952
B/T Late	4	24	1	0.679118
B/T Late	4	24	1	0.742651
B/T Late	4	24	1	0.786865
B/T Late	4	24	1	0.681874
B/T Late	4	24	1	0.704265
T/T Late	1	24	1	0.958686
T/T Late	1	24	1	1.04205
T/T Late	1	24	1	1.0994
T/T Late	2	24	1	1.10392
T/T Late	2	24	1	1.16656
T/T Late	2	24	1	1.05036
T/T Late	2	24	1	1.044
T/T Late	2	24	1	1.04332
T/T Late	2	24	1	0.959419
T/T Late	2	24	1	1.08183
T/T Late	2	24	1	1.07545
T/T Late	2	24	1	1.25121
T/T Late	3	24	1	0.934214
T/T Late	3	24	1	0.716199
T/T Late	3	24	1	0.940439
T/T Late	3	24	1	1.07671
T/T Late	3	24	1	0.98424
T/T Late	3	24	1	0.88456
T/T Late	4	24	1	0.970419
T/T Late	4	24	1	1.0062
T/T Late	4	24	1	0.853809
T/T Late	4	24	1	0.978852
T/T Late	4	24	1	0.949345
T/T Late	4	24	1	1.0323
T/T Late	4	24	1	0.915744
T/T Late	4	24	1	0.924443
T/T Late	4	24	1	1.05501
T/T Late	4	24	1	0.901326
