# Supplementary material for: Damage-induced basal epithelial cell migration modulates the spatial organization of redox signaling and sensory neuron regeneration
Source: eLife. 2024 Aug 29;13:RP94995. doi: 10.7554/eLife.94995 (PMC11361710; doi:10.7554/eLife.94995)
Supplement: Figure 2—source data 2. [file elife-94995-fig2-data2.xlsx]

## Sheet: Ngn1 dual wound escape
Condition	Replicate	n. fish	n respond		This experiment is seeing if fish injured or injured + drug treated have a response to being poked. I would like to compare within timepoints (early-early / late-late), between experimental conditions.
T/T Early	1	8	8
T/T Early	2	8	8
T/T Early	3	8	8
B/T Early	1	8	8
B/T Early	2	8	8
B/T Early	3	8	7
T/T Late	1	8	8
T/T Late	2	8	8
T/T Late	3	8	8
B/T Late	1	7	6
B/T Late	2	8	4
B/T Late	3	8	6
