# Supplementary material for: Damage-induced basal epithelial cell migration modulates the spatial organization of redox signaling and sensory neuron regeneration
Source: eLife. 2024 Aug 29;13:RP94995. doi: 10.7554/eLife.94995 (PMC11361710; doi:10.7554/eLife.94995)
Supplement: Figure 3—source data 1. [file elife-94995-fig3-data1.xlsx]

## Sheet: Sheet1
Condition	Replicate	n. fish	Track Length		*Interested in comparing the effect of the injury type (transection or burn) on track length.
Transect	1	1	78
Transect	2	1	87
Transect	3	1	42
Transect	4	1	56
Transect	5	1	42
Transect	6	1	48.5761
Transect	7	1	55.9847
Transect	8	1	61.4011
Burn	1	1	254
Burn	2	1	214
Burn	3	1	189
Burn	4	1	211
Burn	5	1	232.333
Burn	6	1	200.424
Burn	7	1	191.28
Burn	8	1	153.387
