# Supplementary material for: Damage-induced basal epithelial cell migration modulates the spatial organization of redox signaling and sensory neuron regeneration
Source: eLife. 2024 Aug 29;13:RP94995. doi: 10.7554/eLife.94995 (PMC11361710; doi:10.7554/eLife.94995)
Supplement: Figure 4—figure supplement 1—source data 1. [file elife-94995-fig4-figsupp1-data1.xlsx]

## Sheet: Raw_Normalized
Condition	Rep	Time (hours post-wound)	n. fish	Normalized Density			*These data compare untreated fish to fish treated with the drug DPI. Each rep is a group of fish that received treatment in the same dish at the same time. I would like to see comparisons between conditions
Control	1	24	1	0.69671
Control	1	24	1	0.865333
Control	1	24	1	1.14298
Control	1	24	1	0.886642
Control	1	24	1	1.32344
Control	1	24	1	1.0849
Control	2	24	1	0.942398
Control	2	24	1	0.788657
Control	2	24	1	0.90179
Control	2	24	1	1.03839
Control	2	24	1	1.30327
Control	2	24	1	1.15089
Control	2	24	1	0.874613
Control	3	24	1	1.13725
Control	3	24	1	0.892418
Control	3	24	1	1.17741
Control	3	24	1	0.94778
Control	3	24	1	0.697173
Control	3	24	1	0.946683
Control	3	24	1	1.04891
Control	3	24	1	1.15237
DPI	1	24	1	1.58949
DPI	1	24	1	1.30126
DPI	1	24	1	1.38959
DPI	1	24	1	1.57382
DPI	1	24	1	0.893115
DPI	1	24	1	0.898599
DPI	1	24	1	1.35431
DPI	1	24	1	0.667932
DPI	2	24	1	1.28885
DPI	2	24	1	1.35172
DPI	2	24	1	1.21241
DPI	2	24	1	1.28857
DPI	2	24	1	1.19293
DPI	3	24	1	1.14939
DPI	3	24	1	0.946714
DPI	3	24	1	1.25056
DPI	3	24	1	1.04297
DPI	3	24	1	1.47696
DPI	3	24	1	1.33823
