# Supplementary material for: Damage-induced basal epithelial cell migration modulates the spatial organization of redox signaling and sensory neuron regeneration
Source: eLife. 2024 Aug 29;13:RP94995. doi: 10.7554/eLife.94995 (PMC11361710; doi:10.7554/eLife.94995)
Supplement: Figure 4—source data 1. [file elife-94995-fig4-data1.xlsx]

## Sheet: Sheet1
	Control												CK666
Time (min)	Fish 1	Fish 2	Fish 3	Fish 4	Fish 5	Fish 6	Fish 7	Fish 8	Fish 9	Fish 10			Fish 1	Fish 2	Fish 3	Fish 4	Fish 5	Fish 6	Fish 7	Fish 8	Fish 9	Fish 10
0	0	0	0	0	0	0	0	0	0	0			0.021631	0.02219	0.031413	0.014582	0.019109	-0.00471	-0.00832	0.01	-0.00027	0.030794
0.5	0.0686667	0.0546667	0.0916667	0.093	0.0443333	0.0463333	0.078	0.0213333	0.00466667	0.0873333			0.026125	0.008207	0.039779	-0.00171	0.04051	0.001056	0.002697	0	0.001841	0.007215
1	-0.049	0.045	-0.0506667	0.0686667	0.0306667	0.0623333	-0.0376667	0.046	0.0683333	-0.0323333			0.038764	-0.00095	0.012451	-0.00618	0.034975	0.002303	0.015587	0.01	0.021636	-0.00012
1.5	0.0836667	-0.024	0.0633333	-0.0056667	0.00166667	0.0516667	-0.0043333	0.0473333	-0.0866667	0.0416667			0.047962	-0.00124	-0.02492	0.006514	0.004344	0.004738	0.001585	0.02	0.009652	0.000894
2	-0.0276667	0.014	0.02	0.074	-0.0553333	0.0313333	-0.0153333	-0.0283333	0.0736667	0.0386667			0.008731	0.009808	0.002196	-0.00335	-0.00965	0.003073	0.000973	0.02	0.00858	-0.01151
2.5	-0.0193333	0.005	0.0323333	0.048	0.0836667	0.0453333	0.027	-0.0016667	-0.0433333	0.0613333			-0.0008	0.006874	0.009051	-0.01741	-0.0119	-0.00874	-0.00227	0	0.023031	-0.00011
3	0.0136667	0.028	0.0126667	-0.022	0.0366667	0.0266667	0.0243333	0.00433333	0.0313333	0.043			0.009284	0.000681	0.00729	-0.00023	0.01209	1.5e-05	-0.00483	0.01	0.013607	0.000787
3.5	0.0103333	0.0386667	0.0376667	0.0536667	0.0366667	0.00933333	0.024	0.0303333	0.0623333	0.0336667			0.003539	0.010009	0.002912	0.015696	0.023886	-0.00719	0.009217	0.03	0.00192	-0.00195
4	-0.0066667	0.0166667	0.0123333	0.0316667	0.038	0.0603333	0.0166667	0.0146667	0.032	0.044			0.002525	0.00628	0.002797	0.00688	-0.00639	-0.00416	0.009956	0.01	0.020604	-0.00362
4.5	0.026	0.0146667	0.0286667	0.022	0.048	0.022	0.024	-0.0106667	0.017	0.0516667			0.007023	0.012992	-0.00726	0.024328	-0.00779	0.001163	0.008075	0.01	0.01239	0.00472
5	0.04	0.0506667	0.0133333	0.0306667	0.041	0.0343333	0.0406667	0.0313333	-0.0116667	0.041			0.019581	0.017485	-0.00587	0.028864	-7.4e-05	0.014079	0.00033	0.01	0.005159	0.020932
5.5	0.025	0.0293333	0.0346667	0.0593333	0.0853333	0.0146667	0.0386667	0.002	0.027	0.0616667			0.022004	0.01135	0.003035	0.015785	0.009742	0.010747	-0.0084	0.01	0.004532	-0.00228
6	0.005	0.073	0.016	0.0656667	0.0523333	0.058	0.003	0.0146667	0.0473333	0.0626667			0.005444	0.013955	-0.00457	0.019449	0.014874	0.005375	-0.00311	0	0.009898	-0.00838
6.5	0.0213333	0.0253333	0.059	0.0443333	0.0296667	0.025	0.0323333	0.0293333	0.0123333	0.048			0.005405	0.005735	-0.00101	0.030328	0.009797	0.004564	0.002863	-0.01	0.00894	0.001212
7	-0.023	0.026	0.0403333	0.0353333	0.0596667	0.0323333	0.00766667	0.0343333	0.003	0			0.009781	0.004724	0.01824	0.033079	0.023839	0.008449	0.006694	0	0.007677	0.009418
7.5	0	0.0463333	0.044	0.0506667	0.0893333	0.0763333	0.022	0.0313333	-0.0176667	0.0233333			0.018409	0.01358	0.016388	0.019413	0.008673	0.013956	0.006744	0.01	0.008956	-0.0016
8	0.0306667	0.0313333	0.076	0.0433333	0.0753333	0.0816667	0.0333333	0.038	0.0366667	0.0103333			0.020881	0.01309	0.015808	0.005377	0.002563	0.013206	0.006875	0.01	0.003186	0.005614
8.5	0.00733333	0.0146667	0.061	0.037	0.0303333	0.044	-0.0163333	-0.014	0.048	0.0293333			0.005598	-0.00201	-0.00614	0.009483	0.006966	-0.01654	0.004927	0.01	-0.00064	0.021624
9	0.038	0.0333333	0.037	0.082	0.0676667	0.0156667	0.0553333	0.00766667	0.024	0.0196667			0.008667	0.001373	-0.01979	0.03078	0.013674	-0.01758	0.003033	0.01	-0.00158	0.012893
9.5	0.0743333	0.0646667	0.022	0.025	0.104	0.0756667	0.022	0.03	0.0313333	0.019			0.008746	0.016259	0.000359	0.037022	0.018694	0.01551	0.001548	0	0.009259	-0.00435
10	-0.0013333	0.022	0.0523333	0.024	0.163333	0.0476667	0.00733333	0.00933333	0.0146667	0.025			0.010874	0.011396	0.007186	0.016274	0.019501	0.014907	0.005436	0.01	0.011215	-0.00269
10.5	0.0643333	0.0833333	0.0166667	0.037	0.278	0.092	0.0176667	0.046	0.0176667	0.0366667			-0.00401	0.010611	0.003959	0.00292	0.015053	-0.00245	0.005888	0.01	0.007933	0.011047
11	0.0443333	0.0626667	0.0603333	0.024	0.077	0.0686667	0.0313333	0.0226667	0.002	0.0436667			-0.00542	0.004475	-0.00477	0.020034	0.004979	0.002389	-0.00106	0.01	0.001054	0.00524
11.5	0.00133333	0.0813333	0.0516667	0.027	0.157667	0.085	0.0176667	-0.029	0.04	0.00733333			0.017425	0.00191	0.011358	0.02206	-0.00425	0.000643	0.000356	0.01	0.003136	0.000718
12	0.0346667	0.069	0.0396667	0.0176667	0.118333	0.0673333	-0.0073333	0.059	0.0343333	0.071			0.00801	0.006643	0.026015	0.032407	0.012919	0.002929	-0.00152	0	0.012423	-0.00478
12.5	0.004	-0.07	0.0613333	0.0593333	0.135333	0.0846667	0.0416667	0.034	0.044	0.088			0.007541	0.022177	0.015073	0.040863	0.014196	0.004587	-0.0009	-0.01	0.009672	0.004102
13	0.0253333	0.0923333	0.026	0.0396667	0.156667	0.0836667	0.0166667	0.0623333	0.0636667	-0.0546667			0.011451	0.000115	0.022779	0.005431	0.002712	0.006137	0.005565	0.01	0.003557	0.014306
13.5	0.087	0.143667	0.0466667	0.0326667	0.187333	0.126333	0.022	0.0366667	0.0386667	0.0646667			0.014962	0.000146	0.029162	0.023661	0.006767	0.003069	0.013576	0.02	0.006791	0.002682
14	0.011	0.0756667	0.0453333	0.0346667	0.0966667	0.085	0.0233333	0.0353333	-0.0316667	0.0623333			0.009835	0.009637	0.000676	0.043198	0.015081	0.003416	0.010251	0.01	0.005008	-0.00151
14.5	0.0453333	0.184667	0.0473333	0.025	0.153667	0.0106667	-0.0336667	0.0526667	0.0526667	0.0316667			0.01247	-0.00357	-0.00613	0.01951	0.011328	0.009911	0.002717	0	0.006895	0.001303
15	0.0356667	0.188	0.0386667	0.003	0.167	0.072	0.0603333	0.113	0.022	0.061			-0.0093	0.011906	0.003884	0.046445	0.007452	0.013239	0.003299	-0.03	0.014956	-0.00957
15.5	0.054	0.00433333	0.0626667	0.0546667	0.164667	0.04	0.037	0.0646667	0.04	0.047			-0.0082	0.009367	0.023229	0.057649	0.01158	-0.00214	0.002032	-0.02	0.00797	0.00643
16	0.0606667	0.0856667	0.043	0.0516667	0.104	0.109	0.034	0.0453333	0.04	0.0406667			0.00896	-0.00114	0.032349	0.048835	0.018563	0.00294	-0.001	0.01	0.011776	0.013022
16.5	0.0813333	0.131333	0.0293333	0.0516667	0.171333	0.064	-0.0106667	0.0536667	0.0313333	0.0563333			0.009217	0.003447	0.014643	0.042917	0.007757	0.008679	0.005565	0.01	0.007311	0.019737
17	0.0696667	0.056	0.00966667	0.0386667	0.174	0.0906667	0.034	0.0536667	0.075	0.0913333			0.008166	-0.00159	0.007578	0.033964	-0.00271	-0.0047	0.014216	0.02	0.003694	0.015546
17.5	0.103667	0.153	0.037	0.027	0.151667	0.127	0.022	0.024	0.0373333	0.0666667			-0.00415	0.011966	0.007591	0.038501	1.31e-05	-0.00092	0.018981	0.02	0.007933	0.006725
18	0.0443333	0.0866667	-0.026	0.022	0.135	0.0396667	0.024	0.0173333	0.076	0.038			0.000368	0.020475	0.013006	0.073276	0.014399	0.016476	0.009817	0.01	0.011735	-0.00759
18.5	0.082	0.169667	0.0193333	0.022	0.0986667	0.104333	0.009	0.078	-0.0113333	0.0633333			0.01134	0.001747	-0.00079	0.071116	0.01736	0.000657	0.009529	0	0.020151	0.000391
19	0.0796667	0.156	0.0293333	0.0386667	0.127333	0.0916667	0.037	0.0693333	0.00866667	0.04			0.014394	0.000398	0.004978	0.043307	0.011885	0.004627	0.010462	-0.01	0.017642	0.000583
19.5	0.0683333	0.126333	0.0453333	0.0516667	0.159	0.0596667	0.0283333	0.0376667	0.0536667	0.0546667			0.014261	0.013919	0.01847	0.057666	0.014	0.013091	0.016417	0.01	0.016246	0.012546
20	0.0903333	0.112667	0.0536667	0.022	0.122667	0.0796667	0.0506667	0.0816667	0.0623333	0.046			0.005432	0.010944	0.022005	0.069007	0.017872	0.000259	0.010676	0.02	0.009373	0.003848
20.5	-0.0103333	0.146333	0.0516667	0.0343333	0.0803333	0.038	0.04	0.015	0.0316667	0.072			-1.7e-05	-0.014	0.005309	0.05317	0.03047	0.007614	0.006643	0	0.01247	0.003684
21	0.0643333	0.0906667	0.0146667	0.0326667	0.123333	0.094	0.0103333	0.051	0.0536667	0.0536667			0.010791	-0.01572	-0.00569	0.055773	0.018933	0.017627	0.008747	-0.01	0.019634	0.013693
21.5	0.0846667	0.05	0.0493333	0.022	0.148333	0.067	0.0406667	0.061	0.0263333	0.0876667			0.003253	0.017911	-0.00369	0.07308	0.014189	0.015345	0.012106	0	0.015878	0.017158
22	0.038	0.119333	0.0463333	0.0386667	0.0843333	0.068	0.06	0.084	0.0516667	0.114			0.002679	0.026231	0.00537	0.077593	0.011533	0.026142	0.011114	0.01	0.021223	0.015747
22.5	0.0683333	0.091	0.055	0.0523333	0.115	0.0986667	0.0196667	0.0456667	0.043	0.0603333			0.012343	0.019227	0.025128	0.068633	0.005121	0.018879	0.013304	0.01	0.029064	-0.00713
23	0.0663333	0.1	0.0536667	0.00866667	0.0926667	0.053	0.0533333	0.01	0.0176667	0.071			-0.01054	0.008392	0.028083	0.053498	0.004814	0.010935	0.007906	0.01	0.029541	-0.00931
23.5	0.0833333	0.100667	0.0503333	0.048	0.0696667	0.039	0.0246667	0.0986667	0.0916667	0.0623333			-0.02051	-0.00765	0.000221	0.050748	0.012338	0.01888	0.012136	0.01	0.010893	0.017533
24	0.0513333	0.103333	0.0443333	0.0123333	0.0673333	0.0943333	0.00033333	0.0283333	0.069	0.0713333			0.005561	-0.00773	0.009915	0.081395	0.013063	0.005139	0.017655	0	0.016903	0.015499
24.5	0.0366667	0.0376667	0.043	0.0266667	0.041	0.117333	0.056	0.0533333	0.0133333	0.0716667			-0.00122	0.004568	0.037344	0.083005	0.004856	-0.00399	0.015988	0.01	0.035697	0.001761
25	0.0843333	0.114	0.0356667	0.0546667	0.062	0.031	0.0646667	0.0366667	0.0506667	0.0453333			0.00045	0.015667	0.025181	0.071266	0.015908	0.00171	-9.3e-05	0	0.031189	0.005024
25.5	0.0803333	0.0996667	0.0556667	0.0443333	0.0786667	0.0753333	0.0546667	0.0833333	0.083	0.039			0.004865	0.005969	0.019083	0.081403	0.022821	-0.00593	-0.00047	0.01	0.02916	0.010574
26	0.0916667	0.13	0.0613333	0.0343333	0.0833333	0.0676667	0.0486667	0.0676667	0.0233333	0.056			0.009231	0.000151	0.012286	0.06559	0.014713	0.012107	0.012696	0.01	0.016796	0.014883
26.5	0.0593333	0.111667	0.05	0.076	0.0863333	0.0456667	0.0236667	0.0953333	0.0546667	0.0546667			0.010009	0.005518	0.007562	0.08269	0.015345	0.013954	0.007475	0	0.017599	0.006094
27	0.0893333	0.100667	0.0356667	0.0443333	0.067	0.0636667	0.038	0.068	0.039	0.127			0.008639	0.004966	0.012104	0.08715	0.024797	0.018425	-0.00282	0.01	0.034983	-0.00286
27.5	0.0743333	0.116	0.0403333	0.0516667	0.0466667	0.0103333	0.038	0.0533333	0.069	0.0596667			0.01021	0.007518	0.02715	0.077032	0.0314	0.023574	-0.01173	0.02	0.029272	-0.00027
28	-0.0253333	0.0836667	0.0403333	0.0386667	0.0313333	0.0376667	0.107	0.075	0.065	0.0773333			0.006778	0.00015	0.026649	0.080592	0.035008	0.01134	0.009131	0.02	0.016717	0.000561
28.5	0.0293333	0.124667	0.0456667	0.0416667	0.042	0.0323333	0.0896667	0.0933333	0.099	0.143333			0.013554	0.001155	0.008316	0.051302	0.024802	0.014909	0.02068	0.02	0.015627	-0.00762
29	0.127667	0.0803333	0.058	0.0416667	0.0343333	0.0763333	0.0843333	0.076	0.0636667	0.0733333			0.010978	0.007359	0.013639	0.055691	0.012011	0.021805	0.015798	0	0.008453	-0.00122
29.5	0.0886667	0.06	0.0536667	0.0416667	0.0253333	0.0653333	0.0283333	0.0666667	0.0386667	0.106667			-0.00699	0.00834	0.006921	0.079884	0.011107	0.016895	0.016768	0.02	0.019763	0.000498
30	0.0666667	0.028	0.0446667	0.069	0.0416667	0.058	0.112333	0.0623333	0.035	0.0516667			-0.00187	0.01067	0.015094	0.079165	0.017195	0.018548	0.014412	0.02	0.027928	-0.0026
30.5	0.0926667	0.0343333	0.078	0.038	0.0573333	0.048	0.081	0.117667	0.0446667	0.0966667			0.017377	-0.00467	0.027603	0.087755	0.016104	0.013134	0.019109	0	0.020555	0.011149
31	0.0636667	-0.0043333	0.091	0.0416667	0.0703333	0.043	0.0853333	0.0443333	0.077	0.0793333			0.00388	0.004839	0.025342	0.060604	0.009332	0.015264	0.021745	0	0.021862	0.016249
31.5	-0.0043333	0.0653333	0.0786667	0.0436667	0.067	0.0123333	0.096	0.0786667	0.0996667	0.028			-0.0088	0.001597	0.023403	0.066102	0.022198	0.010382	0.014891	0.01	0.024359	0.023088
32	0.082	0.056	0.0803333	0.0546667	-0.0186667	0.026	0.0486667	0.049	0.0826667	0.061			0.004393	0.005858	0.041121	0.065969	0.004647	0.01287	0.018776	0.01	0.012896	0.014088
32.5	-0.001	0.0523333	0.0563333	0.0313333	0.0343333	0.0573333	0.076	0.0906667	0.019	0.0546667			0.017079	0.010051	0.051342	0.05515	0.011709	0.019654	0.020756	0.01	0.021882	0.013558
33	0.0593333	0.0496667	0.056	0.04	0.015	0.0313333	0.141667	0.222667	0.0266667	0.047			0.00843	0.008916	0.039952	0.070439	0.007239	0.023314	0.010758	0	0.032722	0.01896
33.5	0.06	0.034	0.0196667	0.0546667	0.00933333	0.025	0.113333	0.099	0.0636667	0.0793333			0.011061	0.021457	0.038503	0.059135	0.008659	0.025145	0.017797	0.01	0.011507	0.018359
34	0.087	0.0403333	0.06	0.0536667	0.0223333	0	0.111667	0.0243333	0.018	0.056			-0.00286	0.001026	0.060581	0.062761	0.015959	0.0131	0.014863	0.01	0.010017	0.022098
34.5	0.0643333	0.037	0.0573333	0.053	0.028	0.0473333	0.1	0.0846667	0.0513333	0.132333			-0.01592	-0.00877	0.071383	0.070354	0.005668	0.016258	0.01504	0.02	0.01653	0.028226
35	0.079	0.0433333	0.0333333	0.0473333	0.00033333	0.022	0.094	0.0963333	0.0603333	0.06			-0.01306	0.000777	0.032923	0.067566	0.008285	0.013963	0.023988	0.02	0.027954	0.02579
35.5	0.0423333	0.0466667	0.086	0.0733333	0.0293333	0.024	0.192667	0.118	0.0693333	0.0943333			0.006363	0.002784	0.01837	0.067297	0.0323	0.018621	0.016382	0.01	0.024788	0.011849
36	0.0453333	0.0663333	0.0633333	0.0636667	0.0613333	0.027	0.0666667	0.0676667	0.0916667	0.067			0.006357	0.007672	0.034167	0.056503	0.03225	0.007134	0.009595	0	0.022463	0.006859
36.5	0.01	0.069	0.06	0.0473333	0.0193333	0.0453333	0.085	0.105667	0.039	0.093			0.004181	0.000306	0.040113	0.125215	0.036144	0.004118	0.010537	0	0.035704	0.005039
37	0.0766667	0.048	0.045	0.071	0.00033333	0.0486667	0.0556667	0.128333	0.047	0.120333			0.003422	0.002856	0.053976	0.108372	0.031656	0.017092	0.023982	0.01	0.014649	0.000436
37.5	0.0703333	0.0146667	0.0546667	0.0443333	0.0413333	-0.0193333	0.121333	0.103333	0.0696667	0.145			-0.01143	0.005619	0.066488	0.036805	0.023995	0.022829	0.019426	0.02	0.003979	0.001209
38	0.0766667	0.0146667	0.0643333	0.0413333	0.038	0.045	0.0823333	0.058	0.0726667	0.062			-0.00703	0.013719	0.034941	0.028039	0.025799	0.018856	0.008506	0	0.019982	0.015816
38.5	0.053	0.046	0.054	0.0486667	0.0643333	0.0376667	0.105667	0.0826667	0.0966667	0.073			-0.01033	-0.0056	0.066761	0.006557	0.021131	0.024642	0.020137	-0.01	0.01333	0.020726
39	0.076	0.013	0.053	0.0343333	0.00733333	0.0166667	0.0686667	0.104667	0.062	0.0626667			0.004997	-0.00263	0.074794	0.011323	0.029724	0.04138	0.030878	-0.01	0.018353	0.021206
39.5	0.0623333	0.00866667	0.0366667	0.00866667	0.0103333	0.0146667	0.0663333	0.121	0.0613333	0.0413333			0.009066	-0.00209	0.038336	0.044393	0.034446	0.026712	0.020749	-0.03	0.018291	0.014957
40	0.0706667	-0.0033333	0.098	0.032	-0.0096667	0.00633333	0.132667	0.0906667	0.0893333	0.036			-0.00108	-0.00218	0.048252	0.063557	0.042227	0.020504	0.006939	-0.01	0.038768	0.018882
40.5	0.0813333	0.003	0.0626667	0.055	0.0306667	0.0313333	0.153	0.0813333	0.0826667	0.071			0.014042	0.012759	0.060109	0.064651	0.039449	0.026791	0.009312	-0.02	0.018556	0.018403
41	-0.0693333	-0.0293333	0.048	0.0436667	0.0546667	0.025	0.0436667	0.128667	0.118333	0.0846667			0.016529	0.00713	0.056805	0.041594	0.032721	0.024799	0.020569	-0.01	0.025586	0.017325
41.5	0.0386667	0.0133333	0.043	0.0326667	0.0283333	0.00733333	0.0733333	0.114667	0.0776667	0.0696667			-0.00705	0.004186	0.064097	0.043733	0.033965	0.024735	0.033911	0	0.032627	0.026803
42	0.0443333	0.044	0.0483333	0.069	0.0326667	0.0146667	0.061	0.0866667	0.076	0.193			0.000549	0.004446	0.055896	0.045769	0.01629	0.015169	0.033143	-0.01	0.014058	0.032318
42.5	0.0396667	0.04	0.065	0.0816667	0.0176667	0.0146667	0.041	0.094	0.0706667	0.0486667			0.022269	0.000614	0.049707	0.085009	0.005868	0.003248	0.030866	-0.02	0.008284	0.031543
43	0.0343333	0.0116667	0.0626667	0.0463333	0.0103333	-0.0293333	0.0303333	0.101667	0.0376667	0.062			0.018237	0.020738	0.051494	0.055167	0.117105	0.009664	0.025159	-0.01	0.019761	0.042131
43.5	0.0223333	0.00366667	0.0696667	0.045	0.0386667	0.037	-0.0126667	0.127667	0.0346667	0.0803333			0.015711	0.007021	0.065172	0.094416	0.129504	0.025358	0.013339	0.01	0.043789	0.036717
44	0.0316667	0.0556667	0.071	0.0436667	0.002	0	0.0543333	0.0686667	0.0563333	0.073			0.005075	0.00558	0.043369	0.050263	0.027123	0.023265	0.018635	0.01	0.040706	0.023169
44.5	0.0433333	0.0323333	0.0513333	0.0243333	0.031	0.04	0.071	0.0546667	0.054	0.095			-0.00091	0.010875	0.033229	0.051434	0.027842	0.020988	0.029614	-0.01	0.036322	0.031471
45	0.0516667	0.0396667	0.0546667	0.046	-0.0356667	0.00733333	0.0546667	-0.0026667	0.0863333	0.0306667			0.008652	0.014659	0.043014	0.05328	0.023199	0.019247	0.023454	0	0.019677	0.031527
45.5	0.04	0.037	0.0523333	0.003	0.003	0.024	0.0556667	0.0643333	0.0156667	0.049			0.007156	0.008759	0.060245	0.022838	0.123095	0.026796	0.021826	0.02	0.007759	0.035324
46	0.0146667	0.0366667	0.061	0.0636667	-0.0116667	0.0323333	0.0566667	0.0563333	0.06	0.082			0.000485	0.006762	0.035837	0.028119	0.128658	0.031141	0.031184	0.02	0.023286	0.051564
46.5	0.0146667	0.0366667	0.048	0.0313333	0.0546667	0.0366667	0.0493333	0.0686667	0.0393333	0.0403333			0.000298	0.004055	0.02257	0.049339	0.046651	0.032604	0.027445	0.02	0.03976	0.053853
47	0.0296667	0.0366667	0.0373333	0.0696667	0	-0.0053333	0.0686667	0.073	0.0736667	0.0586667			0.011752	0.005109	0.0454	0.087878	0.055528	0.037403	0.032578	0.02	0.028835	0.047301
47.5	0.049	0.022	0.0473333	0.0706667	0.0233333	-0.022	0.0183333	0.0486667	0.0403333	0.0506667			0.018797	0.000245	0.055657	0.089235	0.053626	0.037001	0.021343	0.02	0.020768	0.041006
48	-0.0023333	-0.0103333	0.059	0.0293333	-0.022	-0.0053333	0.0226667	0.061	0.0806667	0.00766667			0.005872	0.006521	0.042531	0.064651	0.033021	0.029025	0.022881	0.01	0.029463	0.045417
48.5	0.031	0.0293333	0.0783333	0.0323333	0.0146667	0.0146667	0.0316667	0.072	0.073	0.0516667			0	0.002771	0.035142	0.035033	0.120674	0.029861	0.041122	0	0.03222	0.057034
49	0.0313333	-0.0146667	0.0526667	0.0406667	-0.0426667	0.0196667	0.0223333	0.0726667	0.074	0.0546667			0.004594	-0.00246	0.034945	0.033108	0.129844	0.026636	0.033759	0.01	0.032259	0.053993
49.5	0.0416667	0.022	0.0443333	0.058	0.0146667	0.034	0.0506667	0.0686667	0.0726667	0.0343333			0.014253	0.000667	0.02257	0.078276	0.057796	0.01698	0.040225	0.01	0.029793	0.041677
50	0.0366667	0.025	0.0433333	0.025	0	0.022	0.058	0.073	0.0866667	0.0703333			0.021171	0.003048	0.042295	0.066617	0.054603	0.03306	0.033433	0.01	0.028124	0.047111
50.5	0.0643333	0.00733333	0.0623333	0.024	0.00033333	0.0386667	0.0386667	0.07	0.0516667	0.0626667			0.00404	0.00829	0.052005	0.052445	0.057255	0.047244	0.032295	0.02	0.030522	0.044424
51	0.0416667	0.0146667	0.0293333	0.024	-0.0053333	-0.0546667	0.01	0.055	0.0536667	0.0546667			0.004778	0.011134	0.034984	0.034045	0.112566	0.03441	0.036604	0.01	0.025109	0.042368
51.5	0.041	-0.0206667	0.0306667	0.046	-0.0366667	-0.0173333	0.0336667	0.0416667	0.0586667	0.045			0.015819	0.013812	0.016134	0.052156	0.051474	0.023602	0.027448	0.01	0.009305	0.0566
52	0.0176667	0.0486667	-0.0043333	0.00733333	-0.031	0.0386667	0.016	0.0396667	-0.002	0.111			0.007057	0.016612	0.011124	0.036257	0.11627	0.021464	0.032344	0.01	0.003175	0.047609
52.5	0.0146667	0.0386667	0.041	0.0176667	0.00766667	0.0113333	0.044	0.0356667	0.0786667	0.058			0.006658	0.001578	0.027736	0.026202	0.059718	0.009145	0.03999	0	-0.0021	0.053119
53	0.00733333	-0.0206667	0.028	0.022	0.00733333	-0.007	0.0386667	0.0196667	0.0406667	0.071			0.011851	0.004136	0.034891	0.041523	0.097412	0.017598	0.045523	0	0.003849	0.054198
53.5	0.025	0	0.054	0.0526667	-0.004	-0.0146667	0.0386667	0.0103333	0.0643333	0.0506667			0.00307	0.010471	0.039915	0.038169	0.110669	0.030031	0.056524	0.01	0.009659	0.047666
54	0.00733333	0.0103333	0.074	0.058	0.00733333	0.026	0.0283333	0.00933333	0.0876667	0.0443333			0.009485	0.00616	0.036996	0.031838	0.068141	0.033116	0.057816	0.01	0.0216	0.052636
54.5	0.041	0.0166667	0.058	0.0473333	-0.0146667	0.0483333	0.0283333	0.0536667	0.0316667	0.0343333			0.006132	0.003109	0.062009	0.031201	0.070054	0.038683	0.033725	0.01	0.023763	0.053071
55	0.037	0	0.0313333	0.058	0	0.006	0.0223333	0.0316667	0.017	0.0643333			0.004619	-0.00768	0.029745	0.027604	0.056414	0.037489	0.024619	0.02	0.024805	0.06043
55.5	0.0473333	0.024	0.0233333	0.0146667	0.0146667	-0.0073333	0.0253333	0.0786667	0.0393333	0.0586667			3.1e-10	-0.00298	0.014517	0.033229	0.043591	0.029421	0.031678	0.01	0.021017	0.073601
56	0.0473333	0.022	0.0293333	0.0473333	0	0.0293333	0.027	0.0386667	0.047	0.027			-0.00118	0.003703	0.02557	0.056045	0.033765	0.024316	0.032795	0.02	0.02965	0.082811
56.5	0.0386667	0.0146667	0.025	0.0356667	0.0146667	0.022	0.0223333	0.0293333	0.035	0.0473333			0.00438	0.002147	0.024839	0.043451	0.037583	0.042603	0.035472	0.02	0.036421	0.047976
57	0.0386667	0.00733333	0.024	0.022	0.043	0.0103333	0.0103333	0.0293333	0.036	0.022			0.005439	0.009317	0.03022	0.025587	0.045421	0.043797	0.042117	0.01	0.028994	0.046491
57.5	0.0293333	0.022	0.0283333	0.0323333	-0.0126667	0.0323333	0.0443333	0.0306667	0.0323333	0.0376667			0.005984	-0.00384	0.026685	0.010976	0.05916	0.034375	0.042724	0.01	0.019692	0.042333
58	0.0416667	0.0146667	0.0373333	0.028	0.00733333	0.00733333	-0.0053333	0.0146667	0.0223333	0.0476667			0.002178	-0.00806	0.031723	0.018759	0.051994	0.037409	0.03516	0.01	0.019545	0.043732
58.5	0.0306667	0	0.025	0.022	-0.022	0.002	-0.006	-0.0146667	0.026	-0.0043333			0.001726	0.003212	0.039811	-0.00949	0.043786	0.041474	0.013505	0	0.030676	0.039832
59	-0.0163333	0.00733333	0.0326667	0.0176667	0	0.0176667	0.0166667	0.024	0.0226667	0.0103333			-0.00645	0.000958	0.026041	0.00468	0.03859	0.044703	0.025048	0.02	0.025527	0.039027
59.5	-0.022	0	0.0103333	0.0293333	0.0146667	0.0293333	0.003	0.0303333	0.0586667	0.0123333			-0.01178	0.002001	0.03895	0.008597	0.037431	0.04884	0.020729	0.01	0.022783	0.039027
60	0.00733333	0.00733333	0.0103333	0.0146667	0.022	0.0146667	0.006	0.00733333	0.04	0.037
