# Supplementary material for: Damage-induced basal epithelial cell migration modulates the spatial organization of redox signaling and sensory neuron regeneration
Source: eLife. 2024 Aug 29;13:RP94995. doi: 10.7554/eLife.94995 (PMC11361710; doi:10.7554/eLife.94995)
Supplement: Figure 4—source data 2. [file elife-94995-fig4-data2.xlsx]

## Sheet: Sheet1
Condition	Replicate	n. fish	Track Length		*Interested in comparing the effect of the treatment (CK666) on track length
Control	1	1	149.095
Control	1	1	176.381
Control	1	1	160.56
Control	1	1	144.604
Control	2	1	186.718
Control	2	1	142.984
Control	2	1	155.999
Control	3	1	196.711
Control	3	1	164.376
Control	3	1	205.681
CK666	1	1	29.3221
CK666	1	1	29.83
CK666	1	1	101.163
CK666	1	1	177.634
CK666	2	1	118.747
CK666	2	1	63.4798
CK666	2	1	64.9115
CK666	3	1	41.4642
CK666	3	1	72.1414
CK666	3	1	79.3832
