# Supplementary material for: Damage-induced basal epithelial cell migration modulates the spatial organization of redox signaling and sensory neuron regeneration
Source: eLife. 2024 Aug 29;13:RP94995. doi: 10.7554/eLife.94995 (PMC11361710; doi:10.7554/eLife.94995)
Supplement: Figure 4—source data 3. [file elife-94995-fig4-data3.xlsx]

## Sheet: Sheet1
Time (min)	Control Wound normalize	pfbsf intensity		CK666 Wound normalize	pfbsf intensity		Time (min)	Control Fin normalize	pfbsf intensity		CK666 Fin normalize	pfbsf intensity
10	1	21351.7		1	28073.8		10	1	19552.5		1	26775
11	0.998409	21317.8		1.01016	28227.1		11	0.999408	19540.9		0.999843	26747.2
12	1.00622	21484.6		1.01506	28388.5		12	0.999447	19541.7		0.998167	26740.8
13	1.01263	21621.3		1.02554	28625.7		13	0.998227	19517.9		0.997745	26731.8
14	1.0138	21646.5		1.03281	28771.5		14	0.998313	19519.5		0.996509	26707.4
15	1.02187	21818.6		1.04427	28914		15	0.997348	19500.7		0.996725	26682.5
16	1.03049	22002.8		1.04907	29017.9		16	0.997225	19498.3		0.995989	26689.9
17	1.04111	22229.6		1.05983	29211.5		17	0.999152	19535.9		0.996812	26698.2
18	1.05242	22471		1.06523	29373.9		18	1.00028	19557.9		0.995938	26662.1
19	1.05677	22564		1.07142	29542.1		19	1.00281	19607.5		0.99889	26682.8
20	1.06179	22671.1		1.08719	29695		20	1.00251	19601.5		0.999734	26650.1
21	1.06539	22747.9		1.09276	29883.9		21	1.00464	19643.2		1.00058	26676.1
22	1.0665	22771.7		1.09718	30045.8		22	1.00671	19683.7		1.00086	26675.3
23	1.06875	22819.8		1.11448	30212.8		23	1.00841	19716.9		1.00069	26651.8
24	1.0729	22908.2		1.11959	30386.7		24	1.01549	19855.4		1.0012	26665.6
25	1.07856	23029.2		1.12234	30450		25	1.02011	19945.7		1.00033	26677.6
26	1.07767	23010		1.12784	30585.1		26	1.02175	19977.7		1.001	26663.5
27	1.08721	23213.9		1.13383	30751		27	1.03172	20172.7		1.00064	26650.6
28	1.09209	23317.9		1.13572	30960.5		28	1.03401	20217.5		1.00091	26664.3
29	1.09134	23302		1.1344	31083.9		29	1.03589	20254.3		1.00064	26670.8
30	1.09051	23284.2		1.14083	31244		30	1.03933	20321.5		1.00213	26654.8
31	1.10755	23648.2		1.14016	31387.5		31	1.0431	20395.2		1.00098	26651.1
32	1.11251	23754.1		1.14244	31537.3		32	1.04533	20438.8		1.00132	26638.6
33	1.11891	23890.7		1.14089	31655.4		33	1.05118	20553.2		1.00098	26645.7
34	1.11968	23907.2		1.14554	31815.6		34	1.05435	20615.2		1.00172	26654.6
35	1.12465	24013.2		1.14776	31937		35	1.05717	20670.3		1.00092	26671.5
36	1.12939	24114.3		1.15005	31948.3		36	1.05951	20716.1		1.00151	26650.5
37	1.1403	24347.4		1.15212	32079.4		37	1.06315	20787.2		1.00323	26661.4
38	1.14677	24485.6		1.15067	32125.6		38	1.06781	20878.4		1.00345	26625.3
39	1.15333	24625.5		1.16173	32225.9		39	1.06859	20893.6		1.00263	26629.2
40	1.15967	24761		1.16482	32310.8		40	1.07554	21029.5		1.00315	26604.7
41	1.15403	24640.6		1.16585	32434.9		41	1.07651	21048.4		1.00375	26645.2
42	1.17233	25031.2		1.16635	32535.9		42	1.08313	21177.9		1.00522	26614.1
43	1.1737	25060.6		1.17221	32596.5		43	1.08707	21254.9		1.00534	26621.8
44	1.18315	25262.4		1.17735	32617.1		44	1.09117	21335.1		1.00663	26613.2
45	1.18816	25369.4		1.18136	32653.8		45	1.09656	21440.4		1.00738	26628.6
46	1.20338	25694.3		1.18806	33071.3		46	1.10148	21536.8		1.00821	26596.4
47	1.24434	26568.9		1.19025	33124.9		47	1.10398	21585.7		1.009	26619.7
48	1.25484	26792.9		1.18726	33003.7		48	1.11053	21713.6		1.00824	26591.1
49	1.27474	27217.9		1.18441	33063.2		49	1.114	21781.4		1.00851	26605.9
50	1.2806	27343.1		1.18311	33127.8		50	1.11762	21852.2		1.00843	26623.2
51	1.32252	28238.2		1.18761	33138.1		51	1.11668	21833.8		1.00905	26636.9
52	1.336	28526		1.20008	32964.8		52	1.12195	21936.9		1.00717	26632.6
53	1.35677	28969.5		1.20287	32896.5		53	1.12773	22049.9		1.00804	26642.7
54	1.36152	29070.9		1.20827	32834.7		54	1.12926	22079.9		1.00738	26630.4
55	1.37753	29412.7		1.20965	32864.4		55	1.13627	22217		1.00726	26639.3
56	1.38146	29496.6		1.21993	32647.5		56	1.13855	22261.5		1.00711	26593.5
57	1.39535	29793.1		1.21998	32511.2		57	1.14154	22320		1.00803	26608.3
58	1.40677	30037		1.22628	32322.4		58	1.14404	22368.9		1.00726	26603.9
59	1.42528	30432.2		1.23412	32261.3		59	1.14834	22452.9		1.00797	26594.3
60	1.46399	31258.6		1.24196	32320.8		60	1.14523	22392.1		1.00789	26586.7
