# Supplementary material for: Damage-induced basal epithelial cell migration modulates the spatial organization of redox signaling and sensory neuron regeneration
Source: eLife. 2024 Aug 29;13:RP94995. doi: 10.7554/eLife.94995 (PMC11361710; doi:10.7554/eLife.94995)
Supplement: Figure 4—source data 4. [file elife-94995-fig4-data4.xlsx]

## Sheet: Raw_Normalized
Condition	Rep	Time (hours post-wound)	n. fish	Normalized Density			*These data compare untreated fish to fish treated with the drug CK666 Each rep is a group of fish that received treatment in the same dish at the same time. I would like to see comparisons between conditions
Control	1	24	1	1.11203
Control	1	24	1	1.03704
Control	1	24	1	1.63884
Control	1	24	1	0.663855
Control	1	24	1	1.1676
Control	1	24	1	0.707343
Control	1	24	1	0.673292
Control	2	24	1	0.884513
Control	2	24	1	0.952718
Control	2	24	1	0.801098
Control	2	24	1	1.05152
Control	2	24	1	1.30369
Control	2	24	1	0.906733
Control	2	24	1	0.873761
Control	2	24	1	1.22596
Control	3	24	1	0.882211
Control	3	24	1	1.24762
Control	3	24	1	0.968197
Control	3	24	1	0.978102
Control	3	24	1	0.986596
Control	3	24	1	0.934015
Control	3	24	1	0.945167
Control	3	24	1	1.0581
CK666	1	24	1	1.27267
CK666	1	24	1	1.23979
CK666	1	24	1	1.72554
CK666	1	24	1	1.5817
CK666	1	24	1	1.58021
CK666	1	24	1	1.16996
CK666	1	24	1	0.819028
CK666	2	24	1	0.99163
CK666	2	24	1	1.05929
CK666	2	24	1	1.24835
CK666	2	24	1	1.32524
CK666	2	24	1	1.30515
CK666	2	24	1	1.43449
CK666	3	24	1	1.01253
CK666	3	24	1	0.870701
CK666	3	24	1	1.00835
CK666	3	24	1	0.958798
CK666	3	24	1	0.970098
CK666	3	24	1	0.832852
CK666	3	24	1	1.18296
CK666	3	24	1	0.97939
