# Supplementary material for: Damage-induced basal epithelial cell migration modulates the spatial organization of redox signaling and sensory neuron regeneration
Source: eLife. 2024 Aug 29;13:RP94995. doi: 10.7554/eLife.94995 (PMC11361710; doi:10.7554/eLife.94995)
Supplement: Figure 4—source data 5. [file elife-94995-fig4-data5.xlsx]

## Sheet: Ngn1 CK666 burn escape
Condition	Replicate	n. fish	n respond		This experiment is seeing if fish injured or injured + drug treated have a response to being poked. I would like to compare between experimental conditions.
Control	1	8	1
	2	8	0
	3	8	2
	4	8	0
Ck666	1	8	3
	2	8	2
	3	8	3
	4	8	1
