# Supplementary material for: Damage-induced basal epithelial cell migration modulates the spatial organization of redox signaling and sensory neuron regeneration
Source: eLife. 2024 Aug 29;13:RP94995. doi: 10.7554/eLife.94995 (PMC11361710; doi:10.7554/eLife.94995)
Supplement: Figure 5—source data 1. [file elife-94995-fig5-data1.xlsx]

## Sheet: Sheet1
Control	2021.08.07												Isotonic
Time (min)	Fish 1	Fish 2	Fish 3	Fish 4	Fish 5	Fish 6	Fish 7	Fish 8	Fish 9	Fish 10			Fish 1	Fish 2	Fish 3	Fish 4	Fish 5	Fish 6	Fish 7	Fish 8	Fish 9	Fish 10
0.5	0.0302726	0.0142613	-0.00640117	0.0393851	0.039181	-0.0455821	0.00287686	-0.0070726	0.0305885	0.0353409			-0.0203652	0.0346975	0.000586135	-0.0214739	0.0112058	0.0330139	-0.0144535	-0.0104213	-0.0349465	0.0348142
1	0.0237001	0.0184202	-0.0229398	0.0449232	0.0354585	-0.0583984	0.00387924	0.00565917	0.0316199	0.0076168			-0.00496473	0.0185561	-0.015092	-0.00123497	-0.00321474	0.0135119	0.00700963	-0.0129434	-0.0111125	0.00634993
1.5	0.0149273	0.0331908	-0.00568996	0.0224538	0.0304505	-0.0361405	0.00323573	0.0183043	0.0367908	0.0066302			0.005803	0.00939543	-0.00187438	0.0025543	-0.008009	0.0017472	0.0142875	0.000234366	-0.0036609	-0.013896
2	0.0203817	0.0275417	0.0146918	0.030231	0.0229021	-0.0082103	-0.00560323	0.0152602	0.0440294	0.013595			-0.0171559	-0.0075043	0.00214977	0.00109839	-0.00342797	-0.015865	0.0018858	0.00294413	0.00595716	-0.00871993
2.5	0.0228014	0.024582	-0.00692937	0.0288713	0.023792	-0.0307214	0.00451029	0.0066288	0.0468608	-0.000406298			-0.00719453	-0.010947	0.0180179	0.00193187	-0.00367927	-0.0096868	0.00287497	0.00558477	-0.00224593	-0.00284677
3	0.0284567	0.0301362	-0.0006778	0.025768	0.0235981	-0.0242759	0.00217806	0.00951036	0.0442112	0.00934147			0.00906027	-0.00446853	0.00521832	-0.00318167	0.000617535	0.0097809	0.00688173	0.00609033	-0.0115788	0.00623797
3.5	0.028361	0.0342699	0.00671347	0.0490712	0.0201717	-0.0134582	0.00770723	0.00797639	0.0117528	0.0264215			0.00731273	0.0050467	0.00611357	0.0153118	-0.00429203	0.0281454	0.0118638	-0.0031825	0.00447403	0.0075528
4	0.0209655	0.0335746	-0.024314	0.0477146	0.0106814	-0.0349954	0.00963704	0.00745384	0.00996473	0.0239441			0.00225989	0.000743066	-0.00376383	0.00526731	-0.0078585	0.0277479	0.00383508	-0.000306432	0.00408071	-0.00328383
4.5	0.041544	0.0335398	-0.0129044	0.0414906	0.0121562	-0.0250606	0.00116696	0.0192718	0.0340195	0.0213892			-0.00346667	-0.0010932	-0.0182866	0.00707358	0.00321523	0.0078525	-0.00295439	-0.00605347	-0.00557354	-0.0084883
5	0.0348602	0.0219505	0.0030026	0.0341038	0.0110989	-0.00809633	0.0029965	0.0159838	0.0314715	0.0121348			-0.00135867	-0.00657827	-0.00597087	0.000342464	0.0142967	-0.00251983	-0.00153297	-0.00853003	0.00624914	-0.0131017
5.5	0.0178209	0.0321598	-0.0041255	0.0506413	0.0107377	-0.0148632	0.0132902	0.00305638	0.0565444	0.0144738			0.000824433	0.0043362	0.0108372	-0.00701119	-0.00126136	0.0160658	-0.0016564	0.0043509	0.00384307	-0.0039551
6	0.0231062	0.023216	-0.0195253	0.0746315	0.0185535	-0.0380788	0.0190778	0.008274	0.0475021	0.0229875			-0.00451956	0.0132174	-0.00164611	0.00992375	0.00133473	0.0020263	-0.00237243	0.0223042	0.000430107	-0.00379637
6.5	0.0482804	0.0198254	0.00360717	0.0673947	0.0180827	-0.0144755	0.01755	0.0122037	0.020156	0.0192948			0.00573685	-0.0114119	-0.0102528	0.00901073	0.0171984	-0.00758153	0.00217289	0.0088053	-0.00293871	-0.0088884
7	0.0463452	0.0228194	0.0288918	0.0821654	0.0095538	0.019338	0.00508243	0.00799573	0.0260004	0.0227631			0.00615892	0.00420113	-0.00455259	0.00798777	0.0176355	0.0250406	0.00328617	-0.0139397	0.00996063	-0.0052372
7.5	0.0431124	0.0209161	0.0201065	0.094257	0.00955379	0.0105527	0.00225463	-0.0046796	0.0564741	0.0193345			-0.0049437	0.0071812	0.00425779	-0.00291914	-0.00513503	0.0120746	0.00209322	0.00171617	0.00793524	-0.0052969
8	0.0243432	0.0170961	0.0279879	0.0912112	0.0202352	0.00775271	0.0022864	-0.0117277	0.0504064	0.0055901			-0.0107679	0.0114172	0.00881045	-0.00198477	-0.0204041	0.00606197	-0.000134937	0.00329883	0.00918687	-0.0229992
8.5	0.0267469	0.0275841	0.0505023	0.101214	0.0272419	0.0232604	0.00771765	0.00613839	0.033513	0.00407712			-0.00831733	0.0113343	0	0.0156896	-0.00292053	-0.0023667	0.000356063	-0.0010217	0.0121159	-0.0161506
9	0.0425956	0.0235277	0.0617454	0.0996617	0.0342627	0.0274827	0.00826387	0.00536035	0.046477	0.0259384			0.00127903	0.00112172	0.0055499	0.0173401	-0.00602244	-0.0195885	0.000292574	-0.0056372	0.00261283	-0.0173651
9.5	0.0372732	0.00985773	0.0522043	0.109895	0.0374146	0.0147897	0.0164781	0.00785244	0.0653676	0.0252571			-0.000790413	-0.0137214	0.00633603	0.0169587	-0.00520937	-0.0187227	0.000937257	0.00469943	-0.00590001	-0.00913253
10	0.0227433	0.0256924	0.038988	0.141429	0.0239641	0.0150239	0.0297577	0.0162802	0.0686309	0.0149984			-0.00485913	-0.0152391	0.0181447	0.0132549	0.0102292	-0.00305509	0.0010472	0.00474277	0.00275608	-0.000632984
10.5	0.0278983	0.0395686	0.0587543	0.154686	0.0137474	0.0450069	0.0189378	0.0157354	0.0602308	0.0256145			0.00502016	-0.00129393	0.00537997	0.00939476	-0.0006192	0.0162778	0.00524841	-0.00219973	0.00690684	-0.00658325
11	0.0315263	0.0332371	0.0733815	0.151963	0.0218655	0.051516	0.00848003	0.0101453	0.0502425	0.0309988			0.0139975	0.00775528	-0.0102528	0.0108989	0.0175534	0.0149691	0.00399367	0.00107427	0.00254717	0.00191585
11.5	0.0312532	0.0388368	0.0889594	0.16035	0.0348745	0.0540849	0.0199844	0.00517275	0.0545542	0.0297259			0.0261724	0.00318149	0	-0.00149019	-0.00380441	-0.0005036	-0.00135524	0.0112781	0.0146186	-0.00175987
12	0.0175494	0.0404867	0.0800358	0.156665	0.0414329	0.0386029	0.0241851	0.00609109	0.0445818	0.039051			0.018086	0.0120208	0	-0.00048367	-0.0160903	-0.015918	0.00081952	0.00319696	0.0052362	0.00573473
12.5	0.0265873	0.0413883	0.0848641	0.145966	0.034854	0.05001	0.0164105	0	0.0438972	0.0329948			0.00418395	0.0164104	0	0.00739833	0.0076342	0.00811633	0.00184107	-0.00108467	0.00737517	0.011969
13	0.0425551	0.0536002	0.0843017	0.147442	0.030371	0.0539307	0.0142239	0.00807486	0.0701251	0.0352515			0.0104854	-0.00457389	0.0057593	0.0128137	0.00927801	-0.00472477	-0.010737	0.00169007	0.0253703	-0.0215075
13.5	0.0504256	0.0683197	0.0893545	0.124698	0.034184	0.0551706	0.0172062	0.00553333	0.0532386	0.0263131			0.0115731	-0.0122259	-0.0021945	0.0043185	0.0105553	-0.0135324	-0.00701119	-0.0031403	0.0102698	-0.0211889
14	0.059156	0.0623046	0.0873274	0.118828	0.0111196	0.0762077	0.0279751	0.00575863	0.0305335	0.0194917			0.00635121	0.00582178	-0.000225277	0	-0.00451267	-0.00539303	0.0014696	-0.00377014	-0.00261283	-0.00458549
14.5	0.0635503	0.0669124	0.0799645	0.154739	-0.00126764	0.0812322	0.0131183	0.00736336	0.035509	0.0296177			0.00577337	0.0139871	0.00728194	0.006352	-0.0162546	0.00659755	0	0.00027118	0.00895717	-0.00458549
15	0.0610457	0.0614603	0.0852174	0.14766	0.0218367	0.0633807	0.0182613	0.00727025	0.0372768	0.0310743			0.00798801	0.00609129	0	0.00736897	0	0.00651547	0.00781112	-0.00110709	0.00951027	-0.00461793
15.5	0.0599002	0.0538734	0.0923605	0.123408	0.00465426	0.0877062	0.0395823	0.00495133	0.0294175	0.0389988			0.00236603	0.00881532	0.00151755	0.00215156	0.00152392	0.00210547	0.00781112	-0.00096958	-0.0023751	-0.0129697
16	0.0641921	0.0480577	0.0920532	0.125068	0.00116359	0.0908896	0.0612742	0.00765179	0.0360431	0.0311884			-0.00491977	0.00683453	0.00151753	0	0.00345143	0.0195403	0	0.00668467	-0.00559961	-0.00917098
16.5	0.0599653	0.0572908	0.0912598	0.138332	0.0305756	0.0606842	0.0533733	0.0111003	0.0428092	0.0310375			-0.00588258	0.020367	0	0	-0.00692717	0.0091509	-0.00234886	-0.00444432	-0.00935602	-0.00455297
17	0.0727781	0.0671383	0.0933865	0.137553	0.0483367	0.0450498	0.0433885	0.0130386	0.0223394	0.0282897			-0.00906914	0.011937	-0.00458518	0	-0.00246133	0.0186095	-0.00637898	-0.0117204	0.00271808	-0.00611399
17.5	0.0747536	0.0811257	0.0955263	0.137843	0.0456375	0.0498888	0.0621249	0.000634484	0.1058	0.0199367			-0.00673651	-0.0034157	0.00175085	0	0.00694593	3.35161e-05	0.00455114	0.00580542	0.0079457	-0.00611388
18	0.0648613	0.0916203	0.0995545	0.110023	0.0424182	0.0571362	0.0665411	0	0.130467	0.0251489			-0.00474707	-0.00856879	-0.00244005	0	0.00311155	-0.000610467	0.00383982	0.0095442	0.0214551	0
18.5	0.0649959	0.0972082	0.100253	0.137614	0.0623266	0.0379264	0.0565077	0.0100745	0.0399325	0.0238741			0	-0.00765205	-0.002967	0.00576817	0.00194335	-0.00213753	0.00863868	0.00135793	0.0121908	-0.0046623
19	0.0475416	0.0858418	0.120796	0.101642	0.0701907	0.0506056	0.0537717	0.0106803	0.100942	0.0268906			0	-0.00611297	0.000762506	0.00576817	0.00139695	-0.0205665	0.000891964	0.00297453	-0.00633977	0.000504766
19.5	0.0487694	0.0849662	0.145792	0.11849	0.0637409	0.0820514	0.0506929	0.00204827	0.116413	0.028564			0	-0.00156073	-0.012154	0	-0.00294047	-0.000329677	-0.011045	-0.00037709	0.00586177	-6.1901e-05
20	0.0624224	0.104961	0.127637	0.0639643	0.059294	0.0683427	0.0459933	-0.0013852	0.0627422	0.00954847			0	-0.0086909	-0.0029997	0	-0.00732809	-0.00263537	0.00076176	-0.00476969	0.00463675	0.005034
20.5	0.0691527	0.108177	0.0865255	0.0963715	0.0650076	0.0215179	0.0473965	0.00953476	0.0644073	0.0127337			0.00554907	-0.00866922	0.0115102	-0.00302103	0.00121826	-0.0090421	0.00557183	0	-0.000187557	-0.0017296
21	0.0769376	0.104067	0.070697	0.11943	0.090509	-0.0198119	0.0566425	0.0206763	0.0626847	0.031057			0.00554917	0.0140139	0.00792282	-0.00302103	0.0017307	0.00303459	0	0	0.000910164	-0.000566399
21.5	0.093351	0.126708	0.0895356	0.106432	0.110256	-0.0207203	0.0610255	0.0192899	0.0630301	0.0166566			0.00160406	0.0165344	0.00333757	0	-0.0021492	0.0147097	0.00629963	0	0.00129153	-0.0004889
22	0.109356	0.123515	0.0980102	0.0927895	0.0955956	0.00241463	0.0626851	0.0196464	0.0526582	0.00341253			0.00160403	0.0115061	-0.00412473	0.00736897	-0.0071932	0.0166924	0.00923873	-0.0041175	0.00648574	-0.00935363
22.5	0.103621	0.102174	0.111048	0.0813917	0.106364	0.0046841	0.0591593	0.0243478	0.0634647	0.0140517			0	0	0.0026872	0.0094491	0.00588027	0.0209946	0.00293919	0.0019668	0.00464703	-0.00996273
23	0.0787158	0.0875894	0.099706	0.0736049	0.123737	-0.0240307	0.0529914	0.0195237	0.0687576	0.0303939			0.0022455	0.011202	0.00493506	0.00342137	0.0124903	0.0037132	0	0.00756238	0.0006366	0.00482834
23.5	0.0481032	0.0875695	0.094176	0.0753015	0.118025	-0.0238493	0.0518032	0.0210411	0.0586613	0.0312567			0.00224546	0.0112018	0.00805957	0	0.0012224	-0.0256521	0	0.00147806	-0.000476323	0.00850029
24	0.0652974	0.0953409	0.0900574	0.0751512	0.101152	-0.0110944	0.0499887	0.021373	0.0574875	0.0221337			0.0059863	0.00849877	0.00900999	0	-0.000349347	-0.00675493	0	0	0	0.00144813
24.5	0.0986047	0.084053	0.103318	0.106851	0.110973	-0.0076543	0.0513498	0.028108	0.0609017	0.0104137			0.00658387	0.00546396	0.010227	0	-0.00269115	0.0257747	0	0.0106539	0	0.000265199
25	0.100217	0.0709927	0.0882595	0.0978997	0.117263	-0.0290034	0.0654837	0.0274853	0.0498001	0.0172826			0.00158238	-0.00765192	0.0173279	0	-0.000572877	0.00811167	0	0.00103644	0	0.00373649
25.5	0.0818838	0.0930123	0.107744	0.0593732	0.0998658	0.00787783	0.0645976	0.0227387	0.0580513	0.0310984			0.00599207	-0.0102083	0.0162869	-0.00342531	0.00175298	-0.00240887	0	-0.00835342	0.00148544	0.00646999
26	0.0914826	0.098989	0.0982775	0.104704	0.084734	0.0135435	0.0534483	0.0294497	0.0547518	0.0331226			0.00599197	-0.00129045	0.0126719	-0.00342531	-0.00660173	0.0054639	0.0048351	0.00128509	0.00148544	-0.00593223
26.5	0.10265	0.102741	0.0708127	0.10239	0.0829318	-0.0121191	0.0708779	0.0331936	0.0589184	0.023218			0	0.00319667	-0.0138981	-0.00456414	-0.00595231	0.00475263	0.000300283	0.00741455	0	-0.00593233
27	0.105129	0.0820657	0.0740112	0.0336785	0.0893812	-0.01537	0.0750026	0.0245797	0.0619012	0.0208721			0	-0.00461724	-0.0196575	-0.000939103	-0.0124155	0.0118509	0.00319958	0.0150806	0.0145313	0.00151766
27.5	0.113858	0.0834474	0.0608765	0.022539	0.0954074	-0.0345309	0.0675119	0.0203938	0.0681818	0.0269635			0.0113603	0	-0.0105674	0.00249454	0.0039528	0.0130875	0.0110206	0.0178138	0.0061123	0.00280023
28	0.10478	0.102319	0.0732464	0.0299566	0.130443	-0.057197	0.0632027	0.0250901	0.0690026	0.0189348			0.0201109	0	-0.0141457	-0.00765037	0.0048936	0.00604787	0.000533327	0.0137928	-0.00345571	0.00196523
28.5	0.117853	0.108922	0.0759961	0.0681173	0.163446	-0.0874501	0.0685592	0.0395339	0.0734866	0.0125989			0.00843498	-0.0102083	0	-0.00919348	-0.0178139	0.0146569	0.00153416	0.00400679	0.00210073	0
29	0.113783	0.12702	0.0681367	0.0609957	0.104333	-0.0361962	0.0655703	0.0351178	0.0703979	0.0149496			-0.00367646	-0.0102083	-0.0129686	0.0168318	-0.010759	0.00535897	0.0055719	0.000680863	0.00329349	0.00309348
29.5	0.112648	0.133911	0.068122	0.0529932	0.155348	-0.0872263	0.0585202	0.0267808	0.0558987	0.0249747			0.0016975	0	-0.0129689	0.0168318	0.00539857	-0.0290564	-0.00623497	-0.02629	0.00329349	0.0053628
30	0.106145	0.0997232	0.0627036	0.0711854	0.147903	-0.0851997	0.0695384	0.0352241	0.0514392	0.033207			0.0080265	0.00651967	0	0	0.0082483	-0.00980303	-0.00623497	-0.0329552	0	0.00920741
30.5	0.0894516	0.0797579	0.0610186	0.0639907	0.108466	-0.0474478	0.0649481	0.0364466	0.0615129	0.0269641			-0.00222347	0.0143939	0.00595867	0.0072102	-0.0115689	0.0120113	0	0.00122857	0.00441457	0.00371947
31	0.102453	0.0683456	0.0600973	0.0175695	0.117504	-0.0574066	0.0543025	0.0321381	0.0662679	0.0244787			-0.000619413	0.0116782	0.00193515	0.00736897	-0.00148364	-0.00691133	0.00905935	0.00594783	0.00441457	-0.00150682
31.5	0.102602	0.0706634	0.0770809	0.0227254	0.0999427	-0.0228618	0.07213	0.0346698	0.0688218	0.0136302			0.00318639	0.0152207	-0.00197136	0.00152138	0.00686443	0.00437433	0.013773	0.000628563	0.00148544	0.00430555
32	0.0834156	0.0879689	0.0903001	0.0229892	0.107859	-0.0175593	0.0702636	0.0233881	0.0591383	0.0164443			0.00739567	0.0124812	0.00940045	0	-0.00729359	0.025362	0.00570073	-0.00587068	-0.00077746	-0.000752573
32.5	0.0935952	0.07358	0.0689254	0.0149316	0.108176	-0.0392507	0.0694415	0.0333314	0.0513609	0.0268181			0.00451171	0.0142148	0.00563809	0	-0.00379738	0.0156387	-0.000517293	-0.00441342	-3.74503e-05	0.0107686
33	0.108116	0.09674	0.0519833	0.0198094	0.1082	-0.0562172	0.0952391	0.0413165	0.0615996	0.0241661			0.00537712	-0.00240879	0.00191689	0.0104335	-0.0021074	0.00727183	0.00181981	0.00560846	-0.0144911	-0.000134689
33.5	0.104708	0.0912732	0.0714196	0.00551721	0.0974993	-0.0260797	0.110959	0.0481726	0.0741721	0.0236049			0.00577037	-0.00582207	0.00636852	0.0102747	0.000209187	-0.00610307	1.02445e-08	0.00573069	-0.0032583	-0.0132738
34	0.107399	0.106668	0.0456974	0.000926934	0.0637115	-0.0180141	0.0998848	0.040309	0.0758795	0.0393976			0.00448333	-4.27567e-05	-0.00161163	0.00304276	0.0103405	-0.00742456	-0.0014696	0.000444244	0.00375626	0.0047812
34.5	0.104223	0.0618842	0.0375686	-0.00414525	0.0632255	-0.0256569	0.0877185	0.043308	0.059506	0.0472826			0.00976192	-0.00258525	-0.00527617	0.00152138	0.0148993	-0.00090635	0.00293924	0.0031298	0	0.003413
35	0.0828742	0.0516836	0.0372085	0.0165754	0.15238	-0.115171	0.111054	0.0523624	0.0451042	0.00965274			-0.00685655	-0.000185166	-0.0204474	0	0.0113094	0.0062401	0.00328612	0.00853648	0.00919342	-0.007967
35.5	0.0671853	0.0493595	0.0819322	0.0514161	0.0545073	0.0274249	0.10296	0.0519906	0.0527269	0.008162			-0.00752284	0.0039336	-0.0105775	0	0.00493636	0	0.0043232	0.0062564	-0.00293454	-0.00456367
36	0.0706468	0.0648294	0.10072	0.03399	0.146878	-0.0461584	0.092878	0.0603877	0.0465978	0.0428085			0.0132621	0.0144367	-0.00357137	0	-0.00470239	0.0047592	-0.000521113	0.00640462	-0.00696293	0.011259
36.5	0.0667608	0.0460434	0.04238	0.0220225	0.089984	-0.047604	0.11876	0.0592315	0.0570237	0.0494871			0.0125838	0.00434456	-0.00263803	0	-0.00442489	0.0047592	-0.00309897	0.00738872	0.00701721	-0.0130831
37	0.0833128	0.0869061	0.0298023	0.0234703	0.0630323	-0.0332301	0.118899	0.0652014	0.0490702	0.0437224			0.00159322	0.0114452	-0.0159313	0	0.00164696	0.00477867	-0.00645448	-0.00229609	0.00701711	-0.0022531
37.5	0.0994129	0.119463	0.0525864	0.00954473	0.0545861	-0.0019997	0.113092	0.0721798	0.0355422	0.0384161			0.0093329	0.0131399	0.0031265	0	0.00211213	0.0216547	0.00776805	-0.0106451	-0.00439356	0.0171682
38	0.0819435	0.0560395	0.0325311	0.0105782	0.0820889	-0.0495578	0.137906	0.0839134	0.0538553	0.0431528			0.0129003	0.0183366	0.0101351	0.00343107	-0.000470634	0.0169353	0.00614597	-0.0123118	-0.011758	0.000409033
38.5	0.0643495	0.182336	0.0470193	0.0193088	0.0864014	-0.0393821	0.119675	0.0857971	0.0461138	0.053861			-0.00030918	0.0113024	0.00633603	0.00495245	0.00044732	0.00338367	0.0014696	-0.00843406	0.00435832	-0.00312277
39	0.0420388	0.030352	0.0688742	0.0313738	0.0316903	0.0371839	0.0921794	0.0793266	0.0362262	0.0329578			-0.000104813	0.00459549	0.00495674	0.00635301	0.00855936	0.00766073	0.00146962	0.00063921	0.0156966	-0.00016124
39.5	0.0598386	0.163308	0.0775412	0.0261198	0.0393541	0.0381871	0.0954943	0.0706047	0.0593117	0.0418618			0.0080312	0.00483967	0.00920402	0.00637475	0.0188644	-0.00744753	0	0.00751116	0.0136276	-0.0095275
40	0.0428098	0.029332	0.0469065	0.0223314	0.0042544	0.0426521	0.101779	0.0764401	0.0553379	0.0498347			0.00110279	0.00120086	-0.00422437	0.00154311	0.0157467	-0.0020787	0	0.00624264	0.00329349	-0.00212737
40.5	0.0373822	0.019837	0.0257734	0.0228328	-0.0137247	0.0394982	0.0974124	0.0951815	0.0481093	0.0340041			0.00058692	-0.00455213	-0.0151715	0.00827777	0.0130635	0.006488	0.0061258	0.00295611	0	-0.000570367
41	0.0623386	0.0262611	0.0301502	0.0171119	0.024924	0.00522627	0.104583	0.0978227	0.0383009	0.0371024			0.00316476	0.00816398	-0.0121345	0.0134185	-0.000740434	0.0168759	0.0126089	0.00207562	0.0040138	2.16767e-05
41.5	0.0655669	0.0240076	0.0359234	0.0325719	0.02308	0.0128433	0.0976832	0.106796	0.0135468	0.0518673			0.00474707	0.018475	0.000310097	0.0115363	-0.0028998	-0.001694	0.0140408	-0.0146728	0.0121599	-0.00836721
42	0.0407552	0.0751112	0.0433762	0.0256003	0.0398916	0.00348467	0.0848694	0.106048	0.0296062	0.0554551			0.00158238	-0.00521823	0.00695212	0.0115421	0.0036493	-0.0329608	0.00989333	-0.015989	-0.00028969	-0.00284953
42.5	0.028836	0.0780607	0.0340713	0.0991983	0.0445484	-0.0104771	0.0618498	0.0934576	0.0504171	0.0509514			-0.000258	-0.00176607	0.0009322	0.014756	0.0118508	-0.00908323	0.00117847	0.00466967	-0.000981157	0.00648776
43	0.0617096	0.0109461	0.0459887	0.113008	0.0229707	0.023018	0.0652943	0.0956869	0.0369162	0.0483329			0.00198747	0.00880705	0.0009322	0.00685243	-0.00457177	0.00451087	-0.00449277	0.00525986	-0.0044564	-0.00624473
43.5	0.0661983	0.0123471	0.230811	0.0285984	0.0245106	0.2063	0.0847875	0.104897	0.0571161	0.0474121			0.0022455	0.00354938	0.0030459	0.00152138	-0.00432573	0.0158926	0.00207836	0.0100717	0.00610457	-0.00542633
44	0.0718502	0.0311537	0.0883741	0.0318112	0.0114226	0.0769514	0.0832738	0.105707	0.0659825	0.0321837			-0.00673639	0.0060913	0.00304595	0.00152138	-0.00807454	0.00493099	0.00445077	0.002911	0.00819056	0.0217006
44.5	0.0632825	0.0317077	0.241902	0.0289535	0.028949	0.212953	0.0798991	0.107497	0.0405039	0.052842			-0.00075311	0.00303475	0.00322532	0	-0.0184174	-0.00344939	0.00298118	-0.00627086	0.0146676	0.00934599
45	0.0856494	0.0584932	0.0250834	-0.00597575	0.0401131	-0.0150297	0.0767047	0.103392	0.018588	0.0597236			0.017194	-0.00611297	-0.00711733	0.00485913	-0.0032986	-0.00487669	0.00354792	-7.65167e-05	0.0160502	-0.0105738
45.5	0.0811181	0.0535944	0.0325883	0.132231	0.00142873	0.0311595	0.0645068	0.105292	0.0258838	0.0665409			0.00449704	-0.0137	-0.01239	0.0108245	-0.00049006	-0.00167813	0.00537388	0.00513655	0.000789867	-0.0150155
46	0.0412729	0.0139209	0.0672939	0.0501881	0.000740747	0.0665531	0.0388072	0.109742	0.0137679	0.0666535			-0.00445265	-0.0121607	0.00575367	0.0059654	-0.00646546	-0.000360317	0.00209325	0.0131388	-0.00504319	0.00193021
46.5	0.0366077	0.0120768	0.0559329	0.161535	-0.00097213	0.056905	0.0464285	0.0863568	0.0133698	0.0661024			0.00386489	-0.004902	-0.00162928	0.00483163	0	0.0033023	0	0.00737771	-0.00435172	0.00193016
47	0.0267421	0.016314	0.0921793	0.164815	0.0108329	0.0813464	0.0461862	0.101945	0.0918957	0.0781057			-0.0119147	6.0666e-05	-0.00314671	-0.00892597	0.00306957	-0.00545043	0	0.0140357	0.00557354	-0.0115699
47.5	0.0195518	0.0101244	0.113378	0.0263687	0.0240022	0.0893763	0.0868011	0.145913	0.0861132	0.0856533			-0.00796973	0.0063353	0.0129687	-0.0137576	0.0124911	-0.00882493	0.00507448	0.0106694	0.00198047	-0.0103255
48	0.0299621	0.0143287	0.0250685	0.00857423	0.00556014	0.0195083	0.0396056	0.139027	0.0250003	0.0741176			0.00574443	0.0015174	0.0129687	0	-0.000178161	0	0.0050744	-0.00151972	-0.0124713	-0.00303531
48.5	0.0173577	0.00365313	0.0615437	0.113309	0.00052053	0.0610232	0.0373925	0.125461	0.0309373	0.0773397			0.0137573	0.00676466	0.00575367	-0.00462934	-0.0118068	0	0.0014696	-0.00587068	-0.00621353	-0.00303531
49	0.0058504	-0.00454576	0.106593	-0.0168985	0.0132003	0.0933924	0.126573	0.12764	0.0373181	0.0992946			0.00577037	-0.00304573	0.00695474	-0.00798943	0.0059066	0.00567067	0.00298123	-0.00693465	0.00146454	0.0027252
49.5	0.0123079	0.00750653	0.08939	0.166175	0.0108346	0.0785554	0.140535	0.142856	0.0647213	0.108925			-0.00796597	-0.00834786	-0.0033515	-0.00336011	0.00758942	0.0231251	0.00298118	-0.0201003	0.00146452	-0.0140295
50	0.01711	0.0127288	0.110261	0.0293484	-0.0010908	0.111352	0.0262054	0.0943674	0.0619838	0.081069			0.0032445	-0.00540946	0.0057594	0.00306449	-0.00618277	0.0212161	0.0014696	-0.0204047	0.00294996	-0.0142924
50.5	-0.0107271	0.00783763	0.112643	0.157122	0.0183015	0.094341	0.0179582	0.0944285	0.0557972	0.0844944			0.00745717	0.0107086	0.0057593	0.00306449	-0.00275311	0.0209352	0	0.00492715	0.00329577	-0.0114072
51	0.0187041	0.0102445	0.0243111	0.0219608	0.0356961	-0.011385	0.0375597	0.14989	0.0593259	0.0946245			-0.00375338	-0.0137087	-0.0046177	-0.00500377	0.00523248	-0.00117997	0.00207832	0.00814505	-0.000368226	-0.0274804
51.5	0.0276416	-0.0022856	0.0200056	0.155236	0.0209681	-0.0009625	0.0804988	0.148394	0.0216192	0.0841447			0	0.016339	-0.00923525	0.0123789	0.00216283	-0.00430878	0.00207832	0.00936356	-0.000236464	-0.0139912
52	-0.0060027	0.0286053	0.0244932	0.0214825	0.0239014	0.000591783	0.0586684	0.150199	0.0154503	0.0922209			0.0031756	0.0140993	0.00575643	0.0108956	0.00216283	0.00904223	0	0.0104414	0.00441447	0.00874951
52.5	0.0367751	0.0423648	0.00993043	0.1681	0.177793	-0.167863	0.0324171	0.115552	0.0155122	0.0918887			-0.00746835	0.0102479	0.00575653	0	-0.00470239	0.00451087	0	0.00293534	0.0109553	0.0153965
53	0.0531358	0.0047573	0.0189586	0.0196753	0.010128	0.00883067	0.0333156	0.108135	0.0182123	0.0788557			-0.0134959	0.0126786	0.00305679	0	-0.00999988	0	0.00557183	0.00038572	0.0157967	0.0134758
53.5	0.0376779	0.0117369	0.122566	0.02468	0.00647216	0.116094	0.088752	0.0751757	0.0085452	0.0896236			0.00160854	0.0111818	0.00611347	-0.00495782	-0.0171505	0	0.0055719	0.00833481	0.00859637	-0.000277557
54	0.0446934	0.012173	0.143407	0.0229503	0.163014	-0.0196073	0.0875015	0.056576	-0.00122143	0.102983			0.00658117	0.00883123	0.00305679	-0.00433395	-0.019598	0	-0.00881758	0.0103927	0.00389908	0.00291301
54.5	0.051723	0.00969333	0.0181415	0.0284993	0.0061242	0.0120173	0.0376138	0.0675117	0.0079678	0.0723031			-0.00520011	0.0103485	0.00903718	0.00129107	-0.0092087	0	-0.00881772	0.000981023	-0.00360465	0.0141879
55	0.0282193	0.00864223	0.0232847	0.0161266	0.0167923	0.0064924	0.0187172	0.0610977	0.0264209	0.0547097			0	-0.005733	0.00903708	-0.000230307	-0.00648859	0	-0.00036315	-0.00109461	-0.00707847	0.0004338
55.5	0.0209288	0.0088909	0.0808973	0.0203063	0.0143368	0.0665605	0.0477927	0.0543464	0.0421493	0.0676826			-0.00481217	0.0158744	0	0.005971	0	0	0.000741996	0.00760072	-0.00477253	0.0066028
56	0.0219151	0.0176096	0.0978453	0.0323643	-0.00184763	0.0996929	0.0572502	0.0681938	0.0605161	0.0771076			0.00178216	-0.0329156		0.005971	-0.0092087	-0.0101783	0.00316109	0.0131258	0.000759117	0.0169587
56.5	0.0412049	0.0186625	0.0516056	0.0346127	-0.00776634	0.0593719	0.0452749	0.0691656	0.040396	0.0804501			0.0065942	0.00490837		0	-0.0274928	-0.0101783	0.010277	-0.00328095	0.000759117	-0.00117249
57	0.0409794	0.0186974	0.037828	0.0148577	0.166662	-0.128834	0.0126393	0.0826211	0.013214	0.0786276			0.00577637	1.3349e-07		0	-0.0153359	0.0054639	0.0102702	0.0031258	-0.00148545	-0.00917098
57.5	0.0453191	-0.00145985	0.0398452	0.0102697	0.173607	-0.133762	0.0164032	0.084979	0.0175001	0.0678931			0.00577637	-0.00303483		0	0.00920773	0.0054639	0.00762633	0.0119317	0.00408014	0.00742476
58	0.0335244	0.019634	0.0662348	0.0226924	0.0348315	0.0314033	0.0379227	0.063664	0.0377913	0.0770605			0	0.00362286		0	0.0107547	0	0.0114504	-0.00880602	0.00062148	0.0120104
58.5	0.0344539	0.00859274	0.0313205	0.00731743	0.0262597	0.00506085	0.0707368	0.0467227	0.0483498	0.0801865			0	0.00574968		0	0.00117455	-0.0202467	0.00851103	-0.00259351	-0.00632996	-0.00458549
59	0.0382031	-0.00337971	0.0654222	0.0143887	0.0312698	0.0341524	0.0776475	0.0398182	0.05716	0.067937			0	0.00491838		0.00154311	-0.0129767	-0.0147828	0.0014696	0.00621251	-0.00398617	-0.00458549
59.5	0.0309866	0.00224783	0.0785227	0.00347726	0.0214889	0.0570338	0.0915568	0.0310553	0.0542951	0.0713889			0	0.0148678		0.00420172	0	0.00546383	0.00293919	0.00147808	0.00686073	0
60	0.0583987	0.025386	0.1583	-0.0142705	0.00517863	0.153122	0.036926	0.0269199	0.0407997	0.0707518			0.0207572			0.004254	0	0.0104001		0.00295616	0.017461	0.0216804
