# Supplementary material for: Damage-induced basal epithelial cell migration modulates the spatial organization of redox signaling and sensory neuron regeneration
Source: eLife. 2024 Aug 29;13:RP94995. doi: 10.7554/eLife.94995 (PMC11361710; doi:10.7554/eLife.94995)
Supplement: Figure 5—source data 2. [file elife-94995-fig5-data2.xlsx]

## Sheet: Sheet1
Condition	Replicate	n. fish	Track Length		*Interested in comparing the effect of the treatment (isotonic) on track length.
Control	1	1	207.629
Control	2	1	264.366
Control	3	1	264.366
Control	4	1	302.611
Control	5	1	231.076
Control	6	1	187.359
Control	7	1	214.62
Control	8	1	188.909
Control	9	1	186.829
Control	10	1	152.337
Isotonic	1	1	13.1977
Isotonic	2	1	14.6461
Isotonic	3	1	4.99079
Isotonic	4	1	12.6641
Isotonic	5	1	0.562
Isotonic	6	1	16.5158
Isotonic	7	1	15.1602
Isotonic	8	1	5.2422
Isotonic	9	1	13.6421
Isotonic	10	1	0.7147
