# Supplementary material for: Damage-induced basal epithelial cell migration modulates the spatial organization of redox signaling and sensory neuron regeneration
Source: eLife. 2024 Aug 29;13:RP94995. doi: 10.7554/eLife.94995 (PMC11361710; doi:10.7554/eLife.94995)
Supplement: Figure 5—source data 3. [file elife-94995-fig5-data3.xlsx]

## Sheet: Sheet1
	Control Wound			Isotonic Wound				Control Fin			Isotonic Fin
Time (min)	Mean Gray	Normalized Mean Gray		Mean Gray	Normalized Mean Gray		Time (min)	Mean Gray	Normalized Mean Gray		Mean Gray	Normalized Mean Gray
10	44289.7	1		42535.3	1		10	22934.5	1		32800.5	1
11	44119.9	0.996166		43313.6	1.0183		11	22943.1	1.00037		32808.8	1.00025
12	44040.4	0.994371		44106.9	1.03695		12	23004.3	1.00304		32796.8	0.999885
13	44423.5	1.00302		45076.1	1.05973		13	23034.2	1.00434		32769	0.999039
14	45005.5	1.01616		46017	1.08185		14	23086.6	1.00663		32847.6	1.00143
15	45456.9	1.02635		47086.6	1.107		15	23086.9	1.00664		32775.5	0.999237
16	46358.2	1.0467		49266.8	1.15826		16	23198.7	1.01152		32807.9	1.00023
17	47419.9	1.07068		50164.4	1.17936		17	23251.8	1.01383		32790.6	0.999697
18	48710.4	1.09981		51310.6	1.20631		18	23375.6	1.01923		32834.7	1.00104
19	49827.4	1.12503		52317.3	1.22997		19	23436.6	1.02189		32806.8	1.00019
20	51240.1	1.15693		53545.1	1.25884		20	23489.6	1.0242		32814.1	1.00041
21	52250.7	1.17975		54589.6	1.28339		21	23556.2	1.02711		32854.6	1.00165
22	54039.7	1.22014		56378.1	1.32544		22	23532.3	1.02607		32897.4	1.00295
23	56069.9	1.26598		57427.3	1.35011		23	23593.5	1.02873		32913.2	1.00343
24	57223.4	1.29202		58307.4	1.3708		24	23558.6	1.02721		32930.4	1.00396
25	58946.9	1.33094		59548	1.39997		25	23565.3	1.0275		32990.9	1.0058
26	60054	1.35594		60729.6	1.42775		26	23654.8	1.03141		32955.5	1.00473
27	61978.3	1.39939		62101.6	1.46		27	23633.5	1.03048		33051.4	1.00765
28	63739.9	1.43916		63092.2	1.48329		28	23691.4	1.033		33071.2	1.00825
29	65389.3	1.4764		64358.1	1.51305		29	23744.7	1.03532		33068.6	1.00817
30	67495.4	1.52395		66393.3	1.5609		30	23796.9	1.0376		33015.7	1.00656
31	70073.3	1.58216		67689.7	1.59138		31	23897.3	1.04198		33063.2	1.00801
32	71950.1	1.62453		68394.9	1.60795		32	23931.5	1.04347		33035.5	1.00716
33	74242.5	1.67629		69590.9	1.63607		33	23935.6	1.04365		33082.3	1.00859
34	77085.8	1.74049		70716.6	1.66254		34	23975.3	1.04538		33069.8	1.00821
35	79029.5	1.78438		71927.4	1.691		35	24024.3	1.04751		33103.7	1.00924
36	80683.3	1.82172		73278.4	1.72277		36	24139.2	1.05253		33211.5	1.01253
37	83396.1	1.88297		74196.4	1.74435		37	24179	1.05426		33174.7	1.01141
38	84569.9	1.90947		75495.3	1.77489		38	24264.3	1.05798		33190.3	1.01188
39	86376.6	1.95026		76097.2	1.78904		39	24298.9	1.05949		33082.2	1.00859
40	88490.4	1.99799		77501.7	1.82206		40	24317	1.06028		33196.5	1.01207
41	89804.3	2.02766		78159.7	1.83752		41	24366.7	1.06245		33124.2	1.00987
42	90061.7	2.03347		79607.3	1.87156		42	24461.1	1.06656		33268.3	1.01426
43	91139.1	2.0578		80276.3	1.88729		43	24465.7	1.06676		33247.5	1.01363
44	92015.2	2.07758		81558	1.91742		44	24557.2	1.07075		33348.1	1.01669
45	92859	2.09663		83402.9	1.96079		45	24600.3	1.07263		33326.1	1.01602
46	93872.1	2.1195		84539.2	1.98751		46	24628	1.07384		33275.2	1.01447
47	96614.6	2.18142		85647.1	2.01355		47	24699.1	1.07694		33455.1	1.01995
48	97731	2.20663		88174	2.07296		48	24675.9	1.07593		33449.6	1.01979
49	98923.8	2.23356		89175.8	2.09651		49	24763.1	1.07973		33431.3	1.01923
50	100213	2.26268		89653.1	2.10773		50	24806.8	1.08163		33443.2	1.01959
51	101039	2.28131		91188.3	2.14382		51	24839.7	1.08307		33471.6	1.02046
52	104596	2.36162		96933	2.27888		52	24862.6	1.08407		33446.7	1.0197
53	105823	2.38934		98021.9	2.30448		53	24943.6	1.0876		33495.9	1.0212
54	106882	2.41325		98391.8	2.31318		54	24991.3	1.08968		33535.2	1.0224
55	109117	2.46371		99281.8	2.3341		55	25067.4	1.093		33484.8	1.02086
56	110229	2.48883		99582.8	2.34118		56	25077	1.09341		33526.1	1.02212
57	109584	2.47425		100467	2.36196		57	25148.7	1.09654		33587.1	1.02398
58	111314	2.51333		101072	2.37619		58	25186.8	1.0982		33587.2	1.02398
59	110947	2.50503		101258	2.38056		59	25311.1	1.10362		33593.6	1.02418
60	110714	2.49976		102060	2.39941		60	25307.5	1.10347		33548.1	1.02279
