# Supplementary material for: Damage-induced basal epithelial cell migration modulates the spatial organization of redox signaling and sensory neuron regeneration
Source: eLife. 2024 Aug 29;13:RP94995. doi: 10.7554/eLife.94995 (PMC11361710; doi:10.7554/eLife.94995)
Supplement: Figure 5—source data 4. [file elife-94995-fig5-data4.xlsx]

## Sheet: 0 hpw
Condition	Replicate	Time (hours post-wound)	n. fish	Fluorescence Intensity		*The data show the fluorescence intensity values of a dye 0 hours after tissue injury.
Control	1	0	1	0.498276		*We measured dye intensity in two different regions labeled "wound" and "fin".
Control	1	0	1	0.90702		*We are interested in determining whether the treatment condition (isotonic) changed average dye intensity within each region (i.e. comparing control wound to isotonic wound and control fin to isotonic fin)
Control	1	0	1	1.49683		*Drug treated conditions are normalized to the average of the control condition for that replicate
Control	1	0	1	0.756705
Control	1	0	1	0.492946
Control	1	0	1	0.901909
Control	1	0	1	1.08123
Control	1	0	1	0.987855
Control	1	0	1	1.87724
Control	2	0	1	0.581686
Control	2	0	1	0.803884
Control	2	0	1	1.27334
Control	2	0	1	1.34109
Control	3	0	1	0.871789
Control	3	0	1	0.934259
Control	3	0	1	1.20892
Control	3	0	1	1.01239
Control	3	0	1	0.74022
Control	3	0	1	1.08495
Control	3	0	1	0.662037
Control	3	0	1	0.802836
Control	3	0	1	1.04061
Control	3	0	1	0.810638
Control	3	0	1	1.18977
Control	3	0	1	1.04837
Control	3	0	1	1.52329
Control	3	0	1	1.06993
Isotonic	1	0	1	0.904261
Isotonic	1	0	1	0.609546
Isotonic	1	0	1	0.814903
Isotonic	1	0	1	0.552198
Isotonic	1	0	1	0.625299
Isotonic	1	0	1	0.64215
Isotonic	1	0	1	0.569824
Isotonic	1	0	1	0.767026
Isotonic	1	0	1	0.730329
Isotonic	2	0	1	1.01148
Isotonic	2	0	1	0.695175
Isotonic	2	0	1	0.908857
Isotonic	2	0	1	1.43387
Isotonic	2	0	1	1.17499
Isotonic	2	0	1	1.67485
Isotonic	2	0	1	1.57715
Isotonic	2	0	1	1.22683
Isotonic	3	0	1	0.894678
Isotonic	3	0	1	0.939369
Isotonic	3	0	1	1.34797
Isotonic	3	0	1	1.25574
Isotonic	3	0	1	1.54045
Isotonic	3	0	1	1.01094
Isotonic	3	0	1	1.53118
Isotonic	3	0	1	0.839644
Isotonic	3	0	1	0.824595
Isotonic	3	0	1	0.993665
Isotonic	3	0	1	1.158
Isotonic	3	0	1	1.12282
Isotonic	3	0	1	1.30634
