# Supplementary material for: Damage-induced basal epithelial cell migration modulates the spatial organization of redox signaling and sensory neuron regeneration
Source: eLife. 2024 Aug 29;13:RP94995. doi: 10.7554/eLife.94995 (PMC11361710; doi:10.7554/eLife.94995)
Supplement: Figure 5—source data 5. [file elife-94995-fig5-data5.xlsx]

## Sheet: 6 hpw
Condition	Replicate	Time (hours post-wound)	n. fish	Fluorescence Intensity		*The data show the fluorescence intensity values of a dye 6 hours after tissue injury.
Control Wound	1	6	1	0.836955		*We measured dye intensity in two different regions labeled "wound" and "fin".
Control Wound	1	6	1	1.73515		*We are interested in determining whether the treatment condition (isotonic) changed average dye intensity within each region (i.e. comparing control wound to isotonic wound and control fin to isotonic fin)
Control Wound	1	6	1	1.61383		*Drug treated conditions are normalized to the average of the control condition for that replicate
Control Wound	1	6	1	0.676333
Control Wound	1	6	1	0.274447
Control Wound	1	6	1	0.582095
Control Wound	1	6	1	1.36884
Control Wound	1	6	1	0.912345
Control Wound	2	6	1	0.598532
Control Wound	2	6	1	1.76913
Control Wound	2	6	1	1.08241
Control Wound	2	6	1	1.16238
Control Wound	2	6	1	0.638207
Control Wound	2	6	1	0.49517
Control Wound	2	6	1	1.15521
Control Wound	2	6	1	1.3041
Control Wound	2	6	1	0.794854
Control Wound	3	6	1	0.70622
Control Wound	3	6	1	1.80304
Control Wound	3	6	1	1.03193
Control Wound	3	6	1	1.85098
Control Wound	3	6	1	0.536462
Control Wound	3	6	1	0.739504
Control Wound	3	6	1	0.775485
Control Wound	3	6	1	0.575093
Control Wound	3	6	1	0.981279
Isotonic Wound	1	6	1	0.64864
Isotonic Wound	1	6	1	0.693605
Isotonic Wound	1	6	1	0.570278
Isotonic Wound	1	6	1	0.808857
Isotonic Wound	1	6	1	0.357067
Isotonic Wound	1	6	1	0.457249
Isotonic Wound	1	6	1	0.699557
Isotonic Wound	1	6	1	0.537645
Isotonic Wound	1	6	1	0.436193
Isotonic Wound	2	6	1	0.534506
Isotonic Wound	2	6	1	0.495054
Isotonic Wound	2	6	1	0.426915
Isotonic Wound	2	6	1	0.535705
Isotonic Wound	2	6	1	0.511058
Isotonic Wound	2	6	1	0.43665
Isotonic Wound	2	6	1	1.18759
Isotonic Wound	2	6	1	0.488157
Isotonic Wound	2	6	1	0.395494
Isotonic Wound	2	6	1	0.396244
Isotonic Wound	3	6	1	1.43941
Isotonic Wound	3	6	1	1.9144
Isotonic Wound	3	6	1	1.84767
Isotonic Wound	3	6	1	1.47189
Isotonic Wound	3	6	1	1.97056
Isotonic Wound	3	6	1	1.7468
Isotonic Wound	3	6	1	1.41981
Isotonic Wound	3	6	1	2.10509
Isotonic Wound	3	6	1	1.52946
Isotonic Wound	3	6	1	1.22682
Isotonic Wound	3	6	1	1.2436
Isotonic Wound	3	6	1	1.68467
Control Fin	1	6	1	0.599175
Control Fin	1	6	1	1.85131
Control Fin	1	6	1	1.89931
Control Fin	1	6	1	0.541437
Control Fin	1	6	1	0.251995
Control Fin	1	6	1	0.542941
Control Fin	1	6	1	1.48832
Control Fin	1	6	1	0.82551
Control Fin	2	6	1	0.712728
Control Fin	2	6	1	1.595
Control Fin	2	6	1	1.06038
Control Fin	2	6	1	0.959076
Control Fin	2	6	1	0.638506
Control Fin	2	6	1	0.404898
Control Fin	2	6	1	1.85502
Control Fin	2	6	1	1.07157
Control Fin	2	6	1	0.702813
Control Fin	3	6	1	0.552273
Control Fin	3	6	1	1.43865
Control Fin	3	6	1	1.01124
Control Fin	3	6	1	2.59484
Control Fin	3	6	1	0.489194
Control Fin	3	6	1	0.946792
Control Fin	3	6	1	0.466959
Control Fin	3	6	1	0.410008
Control Fin	3	6	1	1.09004
Isotonic Fin	1	6	1	0.069167
Isotonic Fin	1	6	1	0.14597
Isotonic Fin	1	6	1	0.113997
Isotonic Fin	1	6	1	0.120785
Isotonic Fin	1	6	1	0.104356
Isotonic Fin	1	6	1	0.0823891
Isotonic Fin	1	6	1	0.0807628
Isotonic Fin	1	6	1	0.144997
Isotonic Fin	1	6	1	0.147965
Isotonic Fin	2	6	1	0.0997538
Isotonic Fin	2	6	1	0.0582365
Isotonic Fin	2	6	1	0.0765835
Isotonic Fin	2	6	1	0.141181
Isotonic Fin	2	6	1	0.190139
Isotonic Fin	2	6	1	0.0577493
Isotonic Fin	2	6	1	0.40779
Isotonic Fin	2	6	1	0.0903564
Isotonic Fin	2	6	1	0.0823058
Isotonic Fin	2	6	1	0.0896568
Isotonic Fin	3	6	1	0.193113
Isotonic Fin	3	6	1	0.29148
Isotonic Fin	3	6	1	0.706704
Isotonic Fin	3	6	1	0.118045
Isotonic Fin	3	6	1	0.133571
Isotonic Fin	3	6	1	0.607002
Isotonic Fin	3	6	1	0.43252
Isotonic Fin	3	6	1	0.478947
Isotonic Fin	3	6	1	0.52619
Isotonic Fin	3	6	1	0.256535
Isotonic Fin	3	6	1	0.402541
Isotonic Fin	3	6	1	0.743024
