# Supplementary material for: Damage-induced basal epithelial cell migration modulates the spatial organization of redox signaling and sensory neuron regeneration
Source: eLife. 2024 Aug 29;13:RP94995. doi: 10.7554/eLife.94995 (PMC11361710; doi:10.7554/eLife.94995)
Supplement: Figure 6—figure supplement 1—source data 1. [file elife-94995-fig6-figsupp1-data1.xlsx]

## Sheet: Raw_Normalized
Condition	Rep	Time (hours post-wound)	n. fish	Normalized Density			These data compare untreated fish to fish treated with the drug sorbitol. Each rep is a group of fish that received treatment in the same dish at the same time. I would like to see comparisons between conditions.
Control	1	24	1	1.00494
Control	1	24	1	1.28243
Control	1	24	1	0.9555
Control	1	24	1	0.784018
Control	1	24	1	0.916013
Control	1	24	1	1.11614
Control	1	24	1	1.02638
Control	1	24	1	1.06672
Control	1	24	1	1.27258
Control	1	24	1	1.00284
Control	2	24	1	0.598427
Control	2	24	1	0.781873
Control	2	24	1	0.935943
Control	2	24	1	0.611844
Control	2	24	1	0.884614
Control	2	24	1	0.874699
Control	2	24	1	0.927104
Control	2	24	1	0.641742
Control	2	24	1	0.751287
Control	3	24	1	1.35183
Control	3	24	1	1.12791
Control	3	24	1	1.13512
Control	3	24	1	0.997078
Control	3	24	1	0.839468
Control	3	24	1	1.24334
Control	3	24	1	1.13272
Control	3	24	1	1.48449
Control	3	24	1	1.25295
Sorbitol	1	24	1	1.42235
Sorbitol	1	24	1	1.80135
Sorbitol	1	24	1	1.47798
Sorbitol	1	24	1	1.39967
Sorbitol	1	24	1	1.52883
Sorbitol	1	24	1	1.30562
Sorbitol	1	24	1	1.46245
Sorbitol	1	24	1	1.52605
Sorbitol	1	24	1	1.57441
Sorbitol	2	24	1	0.920857
Sorbitol	2	24	1	1.05519
Sorbitol	2	24	1	1.05946
Sorbitol	2	24	1	1.28837
Sorbitol	2	24	1	1.31877
Sorbitol	2	24	1	1.08066
Sorbitol	2	24	1	1.2158
Sorbitol	2	24	1	1.49111
Sorbitol	2	24	1	1.2909
Sorbitol	2	24	1	1.13698
Sorbitol	3	24	1	1.65735
Sorbitol	3	24	1	1.58212
Sorbitol	3	24	1	1.67373
Sorbitol	3	24	1	1.69641
Sorbitol	3	24	1	1.71142
Sorbitol	3	24	1	1.84468
Sorbitol	3	24	1	1.84199
Sorbitol	3	24	1	1.70068
Sorbitol	3	24	1	1.51594
