# Supplementary material for: Damage-induced basal epithelial cell migration modulates the spatial organization of redox signaling and sensory neuron regeneration
Source: eLife. 2024 Aug 29;13:RP94995. doi: 10.7554/eLife.94995 (PMC11361710; doi:10.7554/eLife.94995)
Supplement: Figure 6—figure supplement 1—source data 2. [file elife-94995-fig6-figsupp1-data2.xlsx]

## Sheet: Ngn1 sorbitol escape
Condition	Replicate	n. fish	n respond		This experiment is seeing if fish injured or injured + drug treated have a response to being poked. I would like to compare between experimental conditions.
Control	1	8	2
Control	2	8	2
Control	3	8	1
Sorbitol	1	8	6
Sorbitol	2	8	6
Sorbitol	3	8	5
