# Supplementary material for: Damage-induced basal epithelial cell migration modulates the spatial organization of redox signaling and sensory neuron regeneration
Source: eLife. 2024 Aug 29;13:RP94995. doi: 10.7554/eLife.94995 (PMC11361710; doi:10.7554/eLife.94995)
Supplement: Figure 6—source data 1. [file elife-94995-fig6-data1.xlsx]

## Sheet: Damage Area
Condition	Rep	Time (hours post-wound)	n. fish	Damage Area			These data compare the amount of axon damage between control fish and drug (isotonic) treated fish. Each rep is a group of fish that received treatment in the same dish at the same time. I would like to see comparisons between conditions.
Control	1	6	1	4141.78
Control	1	6	1	3201.78
Control	1	6	1	2969.33
Control	2	6	1	3905.33
Control	2	6	1	2280.44
Control	2	6	1	1154.22
Control	2	6	1	2519.11
Control	2	6	1	2055.11
Control	2	6	1	1902.67
Control	3	6	1	2530.67
Control	3	6	1	2941.33
Control	3	6	1	2025.33
Control	3	6	1	1299.11
Control	3	6	1	2723.11
Control	3	6	1	2068
Isotonic	1	6	1	210.222
Isotonic	1	6	1	1239.11
Isotonic	1	6	1	1193.78
Isotonic	1	6	1	1340.89
Isotonic	2	6	1	1036.44
Isotonic	2	6	1	971.111
Isotonic	2	6	1	1400.89
Isotonic	2	6	1	659.111
Isotonic	3	6	1	1232.44
Isotonic	3	6	1	1263.56
Isotonic	3	6	1	1500.89
Isotonic	3	6	1	1520
Isotonic	3	6	1	924
Isotonic	3	6	1	1092
