# Supplementary material for: Damage-induced basal epithelial cell migration modulates the spatial organization of redox signaling and sensory neuron regeneration
Source: eLife. 2024 Aug 29;13:RP94995. doi: 10.7554/eLife.94995 (PMC11361710; doi:10.7554/eLife.94995)
Supplement: Figure 6—source data 2. [file elife-94995-fig6-data2.xlsx]

## Sheet: Sheet1
Condition	Rep	Time (hours post-wound)	n. fish	Normalized Density			These data compare untreated fish to fish treated with a salt solution. Each rep is a group of fish that received treatment in the same dish at the same time. I would like to see comparisons between conditions
Control	1	24	1	1.08677
Control	1	24	1	0.918376
Control	1	24	1	0.695018
Control	1	24	1	0.969543
Control	1	24	1	0.614844
Control	1	24	1	0.873598
Control	1	24	1	0.658461
Control	1	24	1	0.977585
Control	2	24	1	1.22715
Control	2	24	1	0.974618
Control	2	24	1	0.912613
Control	2	24	1	0.795935
Control	2	24	1	1.07804
Control	2	24	1	0.922674
Control	2	24	1	1.29351
Control	2	24	1	1.35219
Control	2	24	1	1.31472
Control	3	24	1	1.23305
Control	3	24	1	1.25819
Control	3	24	1	1.41271
Control	3	24	1	1.41774
Control	3	24	1	1.18423
Control	3	24	1	1.37062
Control	4	24	1	0.919656
Control	4	24	1	0.663123
Control	4	24	1	0.871036
Control	4	24	1	0.52392
Control	4	24	1	0.593034
Control	4	24	1	1.0129
Control	4	24	1	1.02263
Control	4	24	1	0.99661
Control	4	24	1	0.854921
Iso 24 hr	1	24	1	1.32496
Iso 24 hr	1	24	1	1.32913
Iso 24 hr	1	24	1	1.1767
Iso 24 hr	1	24	1	1.04067
Iso 24 hr	1	24	1	1.4369
Iso 24 hr	1	24	1	1.23949
Iso 24 hr	1	24	1	1.26996
Iso 24 hr	1	24	1	0.96914
Iso 24 hr	1	24	1	1.10918
Iso 24 hr	1	24	1	0.956641
Iso 24 hr	2	24	1	0.911413
Iso 24 hr	2	24	1	1.3458
Iso 24 hr	2	24	1	1.23545
Iso 24 hr	2	24	1	1.1014
Iso 24 hr	2	24	1	1.40721
Iso 24 hr	2	24	1	1.07492
Iso 24 hr	2	24	1	1.08885
Iso 24 hr	2	24	1	1.65677
Iso 24 hr	3	24	1	1.64463
Iso 24 hr	3	24	1	1.62704
Iso 24 hr	3	24	1	1.59578
Iso 24 hr	3	24	1	1.55783
Iso 24 hr	3	24	1	0.819253
Iso 24 hr	4	24	1	1.07036
Iso 24 hr	4	24	1	1.28373
Iso 24 hr	4	24	1	0.947028
Iso 24 hr	4	24	1	1.79424
Iso 24 hr	4	24	1	0.979763
Iso 24 hr	4	24	1	1.11448
Iso 24 hr	4	24	1	0.945413
