# Supplementary material for: Damage-induced basal epithelial cell migration modulates the spatial organization of redox signaling and sensory neuron regeneration
Source: eLife. 2024 Aug 29;13:RP94995. doi: 10.7554/eLife.94995 (PMC11361710; doi:10.7554/eLife.94995)
Supplement: Figure 6—source data 4. [file elife-94995-fig6-data4.xlsx]

## Sheet: Sheet1
Condition	Replicate	Time (hours post-wound)	n. fish	Fluorescence Intensity		*The data show the fluorescence intensity values of a dye 6 hours after tissue injury.
Control Wound	1	6	1	1.16718		*We measured dye intensity in two different regions labeled "wound" and "fin".
Control Wound	1	6	1	0.674077		*We are interested in determining whether the treatment condition (isotonic +1 hpw) changed average dye intensity within each region (i.e. comparing control wound to isotonic wound and control fin to isotonic fin)
Control Wound	1	6	1	0.636977		*Drug treated conditions are normalized to the average of the control condition for that replicate
Control Wound	1	6	1	1.20836
Control Wound	1	6	1	1.59713
Control Wound	1	6	1	0.887584
Control Wound	1	6	1	0.621805
Control Wound	1	6	1	1.37745
Control Wound	1	6	1	1.26203
Control Wound	1	6	1	0.567397
Control Wound	2	6	1	0.91748
Control Wound	2	6	1	0.572768
Control Wound	2	6	1	0.633443
Control Wound	2	6	1	1.38859
Control Wound	2	6	1	0.486032
Control Wound	2	6	1	1.73797
Control Wound	2	6	1	1.86372
Control Wound	2	6	1	1.17226
Control Wound	2	6	1	0.902931
Control Wound	2	6	1	0.862603
Control Wound	2	6	1	0.895532
Control Wound	2	6	1	0.566676
Control Wound	3	6	1	1.69237
Control Wound	3	6	1	0.841383
Control Wound	3	6	1	1.04777
Control Wound	3	6	1	1.05642
Control Wound	3	6	1	0.994183
Control Wound	3	6	1	0.884731
Control Wound	3	6	1	0.355953
Control Wound	3	6	1	1.26674
Control Wound	3	6	1	0.860451
Isotonic +1 hpw Wound	1	6	1	1.31903
Isotonic +1 hpw Wound	1	6	1	1.07802
Isotonic +1 hpw Wound	1	6	1	0.890282
Isotonic +1 hpw Wound	1	6	1	0.787676
Isotonic +1 hpw Wound	1	6	1	0.988189
Isotonic +1 hpw Wound	1	6	1	1.06327
Isotonic +1 hpw Wound	1	6	1	1.04619
Isotonic +1 hpw Wound	1	6	1	0.718793
Isotonic +1 hpw Wound	1	6	1	1.19429
Isotonic +1 hpw Wound	1	6	1	0.50528
Isotonic +1 hpw Wound	2	6	1	0.884547
Isotonic +1 hpw Wound	2	6	1	1.81924
Isotonic +1 hpw Wound	2	6	1	0.6269
Isotonic +1 hpw Wound	2	6	1	1.6262
Isotonic +1 hpw Wound	2	6	1	0.983846
Isotonic +1 hpw Wound	2	6	1	1.14753
Isotonic +1 hpw Wound	2	6	1	1.01361
Isotonic +1 hpw Wound	2	6	1	1.40018
Isotonic +1 hpw Wound	2	6	1	0.989653
Isotonic +1 hpw Wound	2	6	1	0.721198
Isotonic +1 hpw Wound	2	6	1	0.923315
Isotonic +1 hpw Wound	3	6	1	1.68574
Isotonic +1 hpw Wound	3	6	1	1.08546
Isotonic +1 hpw Wound	3	6	1	1.37617
Isotonic +1 hpw Wound	3	6	1	1.20054
Isotonic +1 hpw Wound	3	6	1	1.77317
Isotonic +1 hpw Wound	3	6	1	0.838764
Isotonic +1 hpw Wound	3	6	1	1.13657
Isotonic +1 hpw Wound	3	6	1	1.26762
Isotonic +1 hpw Wound	3	6	1	1.10168
Isotonic +1 hpw Wound	3	6	1	1.06649
Control Fin	1	6	1	1.18671
Control Fin	1	6	1	0.543959
Control Fin	1	6	1	0.782704
Control Fin	1	6	1	1.53613
Control Fin	1	6	1	1.52992
Control Fin	1	6	1	0.787998
Control Fin	1	6	1	0.806223
Control Fin	1	6	1	0.897441
Control Fin	1	6	1	1.27234
Control Fin	1	6	1	0.656569
Control Fin	2	6	1	0.933783
Control Fin	2	6	1	0.613883
Control Fin	2	6	1	0.688026
Control Fin	2	6	1	1.18746
Control Fin	2	6	1	0.704584
Control Fin	2	6	1	2.15272
Control Fin	2	6	1	1.21944
Control Fin	2	6	1	1.28818
Control Fin	2	6	1	0.775544
Control Fin	2	6	1	0.799384
Control Fin	2	6	1	0.829043
Control Fin	2	6	1	0.807965
Control Fin	3	6	1	1.78547
Control Fin	3	6	1	0.777402
Control Fin	3	6	1	1.24622
Control Fin	3	6	1	0.987147
Control Fin	3	6	1	0.944019
Control Fin	3	6	1	0.710199
Control Fin	3	6	1	0.286453
Control Fin	3	6	1	1.42295
Control Fin	3	6	1	0.840143
Isotonic +1 hpw Fin	1	6	1	0.975157
Isotonic +1 hpw Fin	1	6	1	0.725569
Isotonic +1 hpw Fin	1	6	1	1.23985
Isotonic +1 hpw Fin	1	6	1	0.61216
Isotonic +1 hpw Fin	1	6	1	1.19051
Isotonic +1 hpw Fin	1	6	1	1.18998
Isotonic +1 hpw Fin	1	6	1	1.29273
Isotonic +1 hpw Fin	1	6	1	0.66554
Isotonic +1 hpw Fin	1	6	1	1.51163
Isotonic +1 hpw Fin	1	6	1	0.498831
Isotonic +1 hpw Fin	2	6	1	0.660649
Isotonic +1 hpw Fin	2	6	1	1.54992
Isotonic +1 hpw Fin	2	6	1	0.625847
Isotonic +1 hpw Fin	2	6	1	1.41368
Isotonic +1 hpw Fin	2	6	1	0.859305
Isotonic +1 hpw Fin	2	6	1	0.585065
Isotonic +1 hpw Fin	2	6	1	1.12108
Isotonic +1 hpw Fin	2	6	1	1.43614
Isotonic +1 hpw Fin	2	6	1	0.946565
Isotonic +1 hpw Fin	2	6	1	0.630813
Isotonic +1 hpw Fin	2	6	1	0.948491
Isotonic +1 hpw Fin	3	6	1	0.864581
Isotonic +1 hpw Fin	3	6	1	0.816316
Isotonic +1 hpw Fin	3	6	1	1.17694
Isotonic +1 hpw Fin	3	6	1	1.04148
Isotonic +1 hpw Fin	3	6	1	1.61771
Isotonic +1 hpw Fin	3	6	1	0.996436
Isotonic +1 hpw Fin	3	6	1	0.717388
Isotonic +1 hpw Fin	3	6	1	1.057
Isotonic +1 hpw Fin	3	6	1	1.17054
Isotonic +1 hpw Fin	3	6	1	0.827702
