# Supplementary material for: Damage-induced basal epithelial cell migration modulates the spatial organization of redox signaling and sensory neuron regeneration
Source: eLife. 2024 Aug 29;13:RP94995. doi: 10.7554/eLife.94995 (PMC11361710; doi:10.7554/eLife.94995)
Supplement: Figure 6—source data 5. [file elife-94995-fig6-data5.xlsx]

## Sheet: Raw_Normalized
Condition	Rep	Time (hours post-wound)	n. fish	Normalized Density			These data compare untreated fish to fish treated with the drug NAC. Each rep is a group of fish that received treatment in the same dish at the same time. I would like to see comparisons between conditions
Control	1	24	1	1.39183
Control	1	24	1	1.56962
Control	1	24	1	1.06637
Control	1	24	1	1.21067
Control	1	24	1	1.27602
Control	1	24	1	0.730923
Control	1	24	1	0.765921
Control	1	24	1	1.41504
Control	1	24	1	0.804459
Control	1	24	1	0.77567
Control	1	24	1	1.01597
Control	1	24	1	0.772574
Control	2	24	1	1.33396
Control	2	24	1	0.858852
Control	2	24	1	0.952782
Control	2	24	1	1.00245
Control	2	24	1	1.27058
Control	2	24	1	1.23741
Control	2	24	1	1.02063
Control	3	24	1	0.993307
Control	3	24	1	1.01735
Control	3	24	1	0.655871
Control	3	24	1	0.716034
Control	3	24	1	0.950623
Control	3	24	1	1.20591
Control	3	24	1	0.738526
Control	3	24	1	0.839412
Control	3	24	1	0.813935
Control	3	24	1	0.597291
Isotonic+1hpw	1	24	1	1.32559
Isotonic+1hpw	1	24	1	1.22797
Isotonic+1hpw	1	24	1	0.660959
Isotonic+1hpw	1	24	1	1.27667
Isotonic+1hpw	1	24	1	1.14393
Isotonic+1hpw	1	24	1	1.25366
Isotonic+1hpw	1	24	1	1.04286
Isotonic+1hpw	1	24	1	1.23561
Isotonic+1hpw	1	24	1	1.15192
Isotonic+1hpw	1	24	1	0.701282
Isotonic+1hpw	1	24	1	0.888006
Isotonic+1hpw	1	24	1	1.09223
Isotonic+1hpw	2	24	1	1.01803
Isotonic+1hpw	2	24	1	1.02908
Isotonic+1hpw	2	24	1	1.24825
Isotonic+1hpw	2	24	1	1.24512
Isotonic+1hpw	2	24	1	1.07037
Isotonic+1hpw	2	24	1	1.11855
Isotonic+1hpw	2	24	1	1.13596
Isotonic+1hpw	2	24	1	1.23197
Isotonic+1hpw	3	24	1	0.561629
Isotonic+1hpw	3	24	1	0.973744
Isotonic+1hpw	3	24	1	0.742567
Isotonic+1hpw	3	24	1	0.822553
Isotonic+1hpw	3	24	1	0.836879
Isotonic+1hpw	3	24	1	1.05602
Isotonic+1hpw	3	24	1	0.770046
Isotonic+1hpw	3	24	1	0.979781
Isotonic+1hpw	3	24	1	1.15023
