# Supplementary material for: Damage-induced basal epithelial cell migration modulates the spatial organization of redox signaling and sensory neuron regeneration
Source: eLife. 2024 Aug 29;13:RP94995. doi: 10.7554/eLife.94995 (PMC11361710; doi:10.7554/eLife.94995)
Supplement: Figure 6—source data 6. [file elife-94995-fig6-data6.xlsx]

## Sheet: Ngn1 isotonic post wound escape
Condition	Replicate	n. fish	n respond		This experiment is seeing if fish injured or injured + drug treated have a response to being poked. I would like to compare between experimental conditions.
Control	1	10	0
Control	2	10	0
Control	3	8	1
Isotonic +1 hr	1	10	2
Isotonic +1 hr	2	10	1
Isotonic +1 hr	3	8	3
