# Supplementary material for: Damage-induced basal epithelial cell migration modulates the spatial organization of redox signaling and sensory neuron regeneration
Source: eLife journal article supplement (doi:10.7554/elife.94995), 2024-03-12
Supplement: figures [file elife-94995-figures-v1.pdf]

---

## Figures and figure supplements

Damage-induced basal epithelial cell migration modulates the spatial organization of redox signaling and sensory neuron regeneration

**Alexandra M Fister and Adam Horn *et al.***

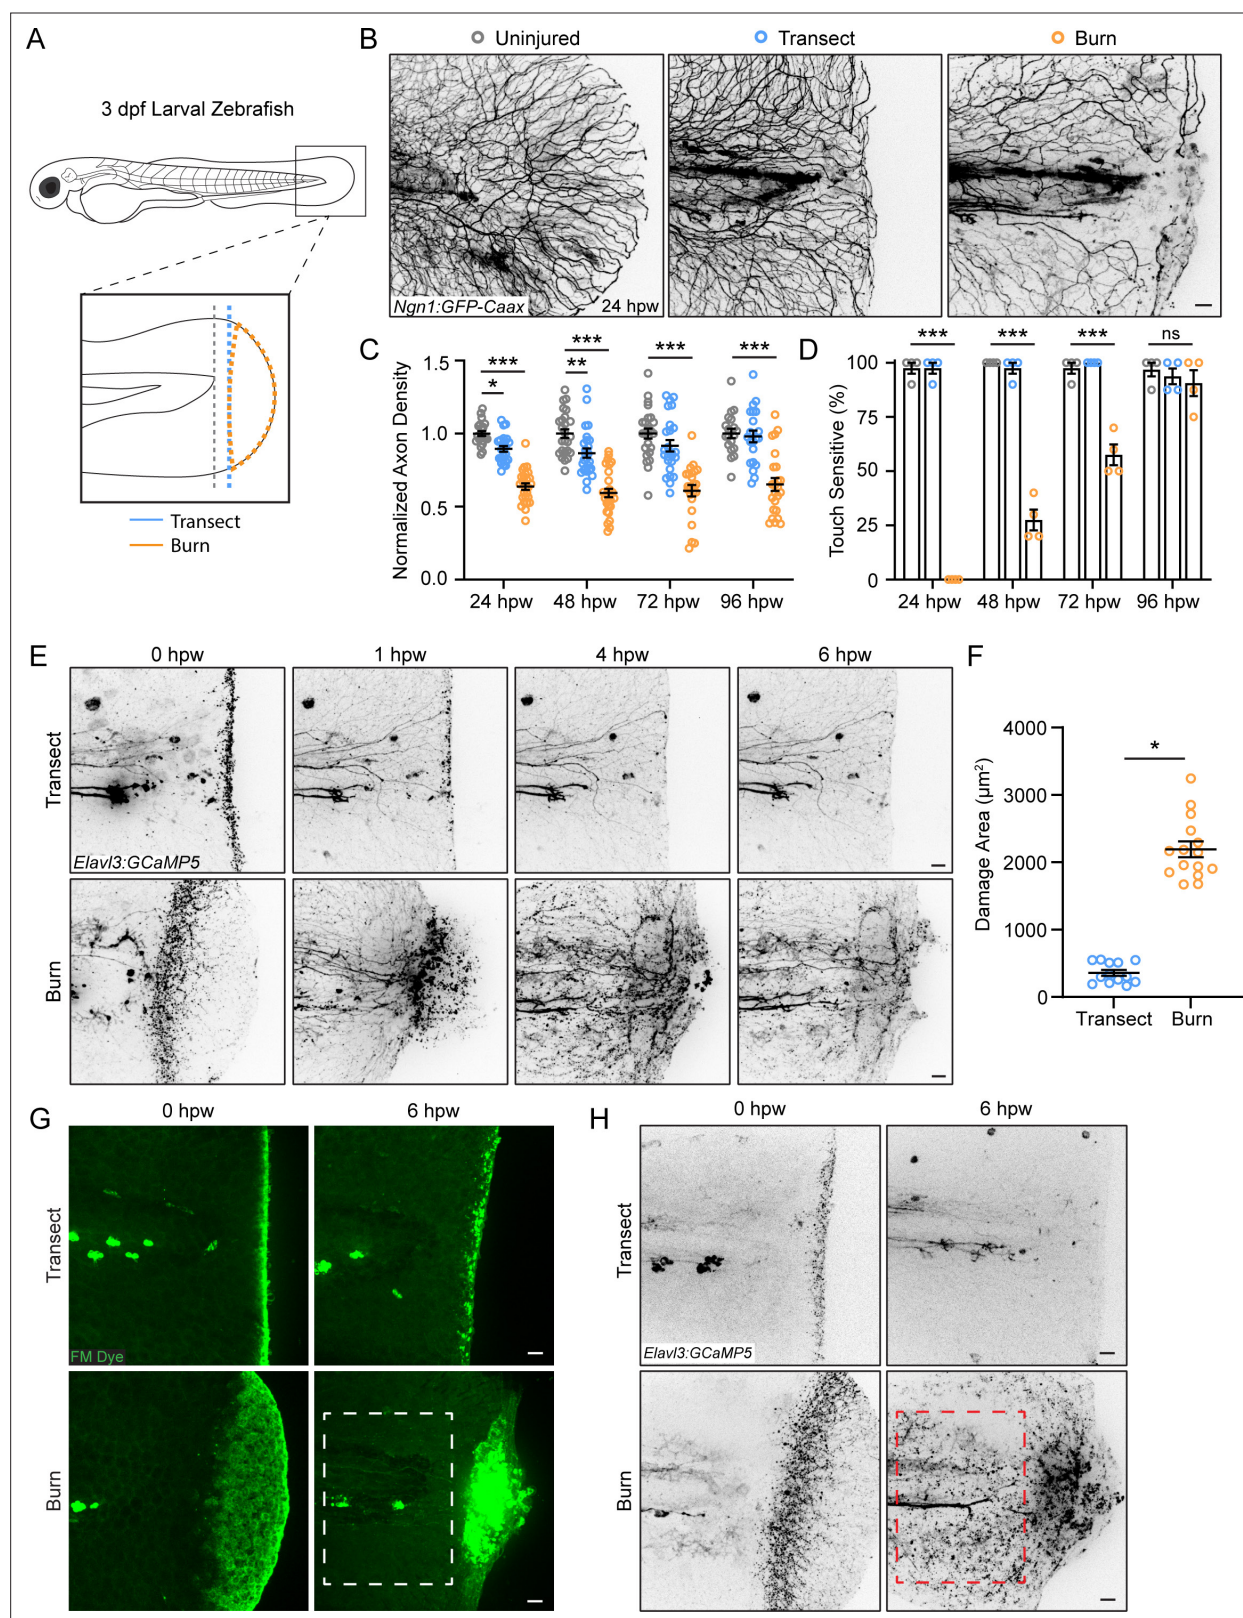

**Figure 1.** Peripheral sensory axons have impaired regeneration after burn injury. **(A)** Schematic of larval zebrafish injury. Gray dashed line denotes area used to measure axon density to the right of the notochord. **(B)** Confocal max-projected images of sensory axons in uninjured, transected, and burned *Tg(Ngn1:GFP-Caax)* caudal fins 24 hr post-wound (hpw). **(C)** Quantification of axon density for uninjured, transected, and burned larvae in the wound area 24–96 hpw.  $N > 20$  larvae per condition from four replicates. **(D)** Quantification of sensory perception for uninjured, transected, and burned

Figure 1 continued on next page

## Figure 1 continued

larvae 24–96 hpw. N>32 larvae per condition from four replicates. **(E)** Confocal time-series images of axonal damage, indicated by calcium-positive punctae (black dots), in *Tg(Elav13:GCaMP5)* larvae following either transection or burn injury. Each series follows one representative larva over 6 hpw. **(F)** Quantification of axon damage area in transected and burned larvae 6 hpw. N>12 larvae per condition from two replicates. **(G)** Images of larvae either transected or burned in the presence of FM 1–43 dye. White dashed box denotes area of uninjured tissue in which axonal damage appears in H. **(H)** Images show axonal damage following transection or burn injury. Red dashed box corresponds to the tissue region highlighted in G. In all cases, scale bars = 20  $\mu\text{m}$ . \* $p<0.05$ , \*\* $p<0.01$ , \*\*\* $p<0.001$ , ns = not significant.



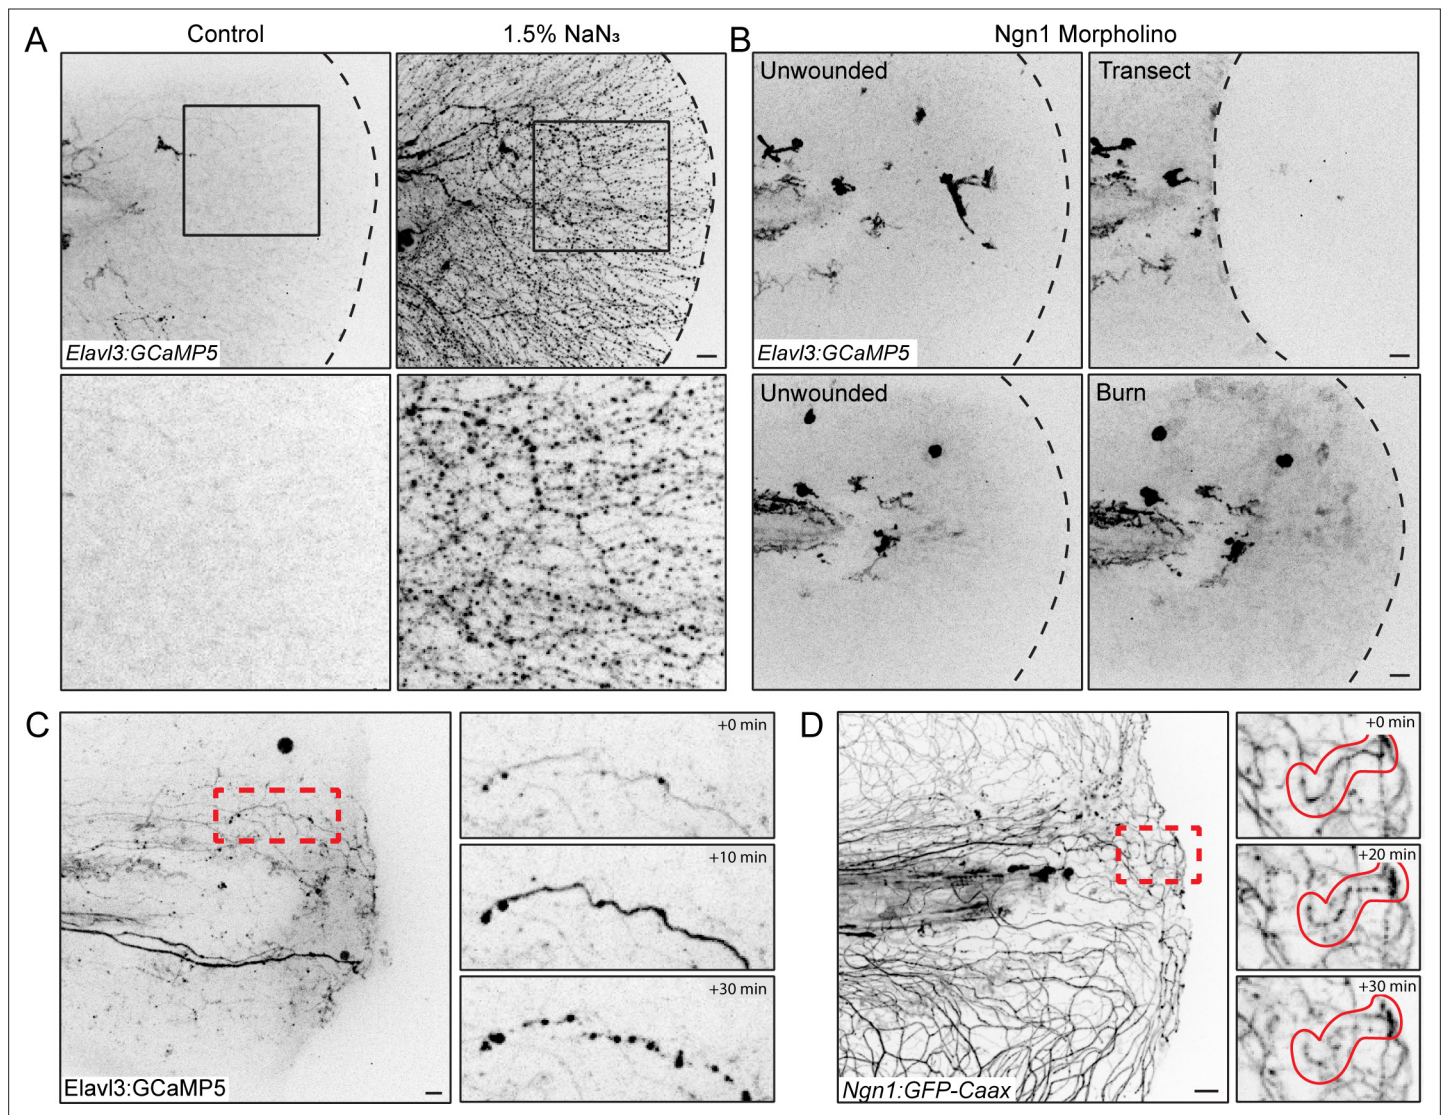

**Figure 1—figure supplement 1.** *Elavl3-GCaMP5* transgenic fish show sensory axon damage. (A) Confocal max-projected images of axon damage in *Tg(Elavl3:GCaMP5)* larval zebrafish caudal fins either untreated or 30 min post-treatment with the neurotoxin sodium azide ( $\text{NaN}_3$ , 1.5% final concentration). Sensory neuron damage is indicated by calcium-positive axon fragments (black dots). Dashed black lines denote the fin edge. Black boxes highlight area of inset, shown below. (B) Confocal max-projected images of *Tg(Elavl3:GCaMP5)* larvae injected with Ngn1 morpholino both before and 5 min after the indicated injury. (C) Confocal max-projected images of *Tg(Elavl3:GCaMP5)* larvae taken from a time series. Red dashed box denotes inset area shown on right of a sensory axon fragmenting over a period of 30 min. (D) Confocal max-projected images of *Tg(Ngn1:GFP-Caax)* larvae taken from a time series. Red dashed box denotes inset area shown on right of a sensory axon fragmenting over a period of 30 min. In all cases, scale bar = 20  $\mu\text{m}$ .



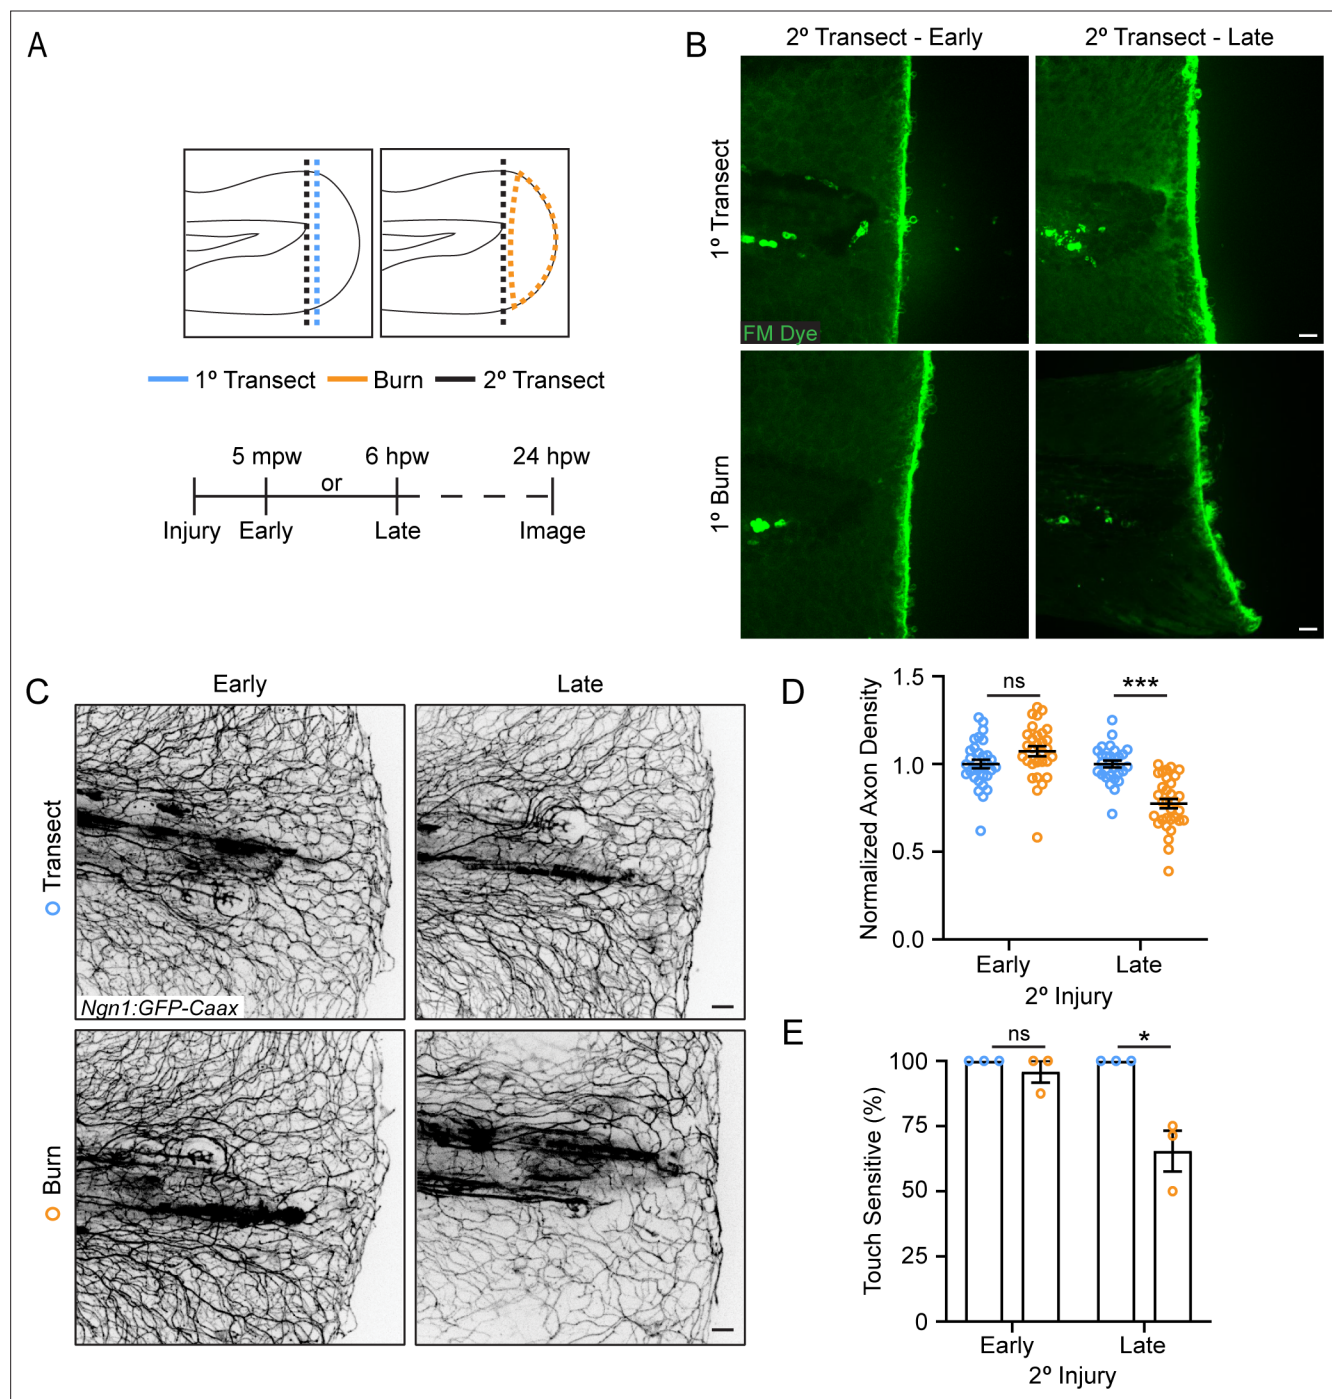

**Figure 2.** The burn wound microenvironment contributes to impaired sensory axon regeneration. **(A)** Schematic of two-wound experiment design. **(B)** Confocal max-projected images of FM dye staining following secondary transection in the two-wound experiment at 5 min post-wound (mpw) and 6 hr post-wound (hpw). **(C)** Images of sensory axons in larvae subjected to an initial transection or burn injury followed by subsequent transection either early (5 mpw) or late (6 hpw). **(D)** Quantification of axon density in wounded tissue 24 hpw from larvae wounded as in B.  $N > 28$  larvae per condition from three replicates. **(E)** Quantification of sensory perception in wounded tissue 24 hpw from larvae wounded as in B.  $N = 24$  larvae each from three replicates. In all cases, scale bars = 20  $\mu$ m. \* $p < 0.05$ , \*\*\* $p < 0.001$ , ns = not significant.



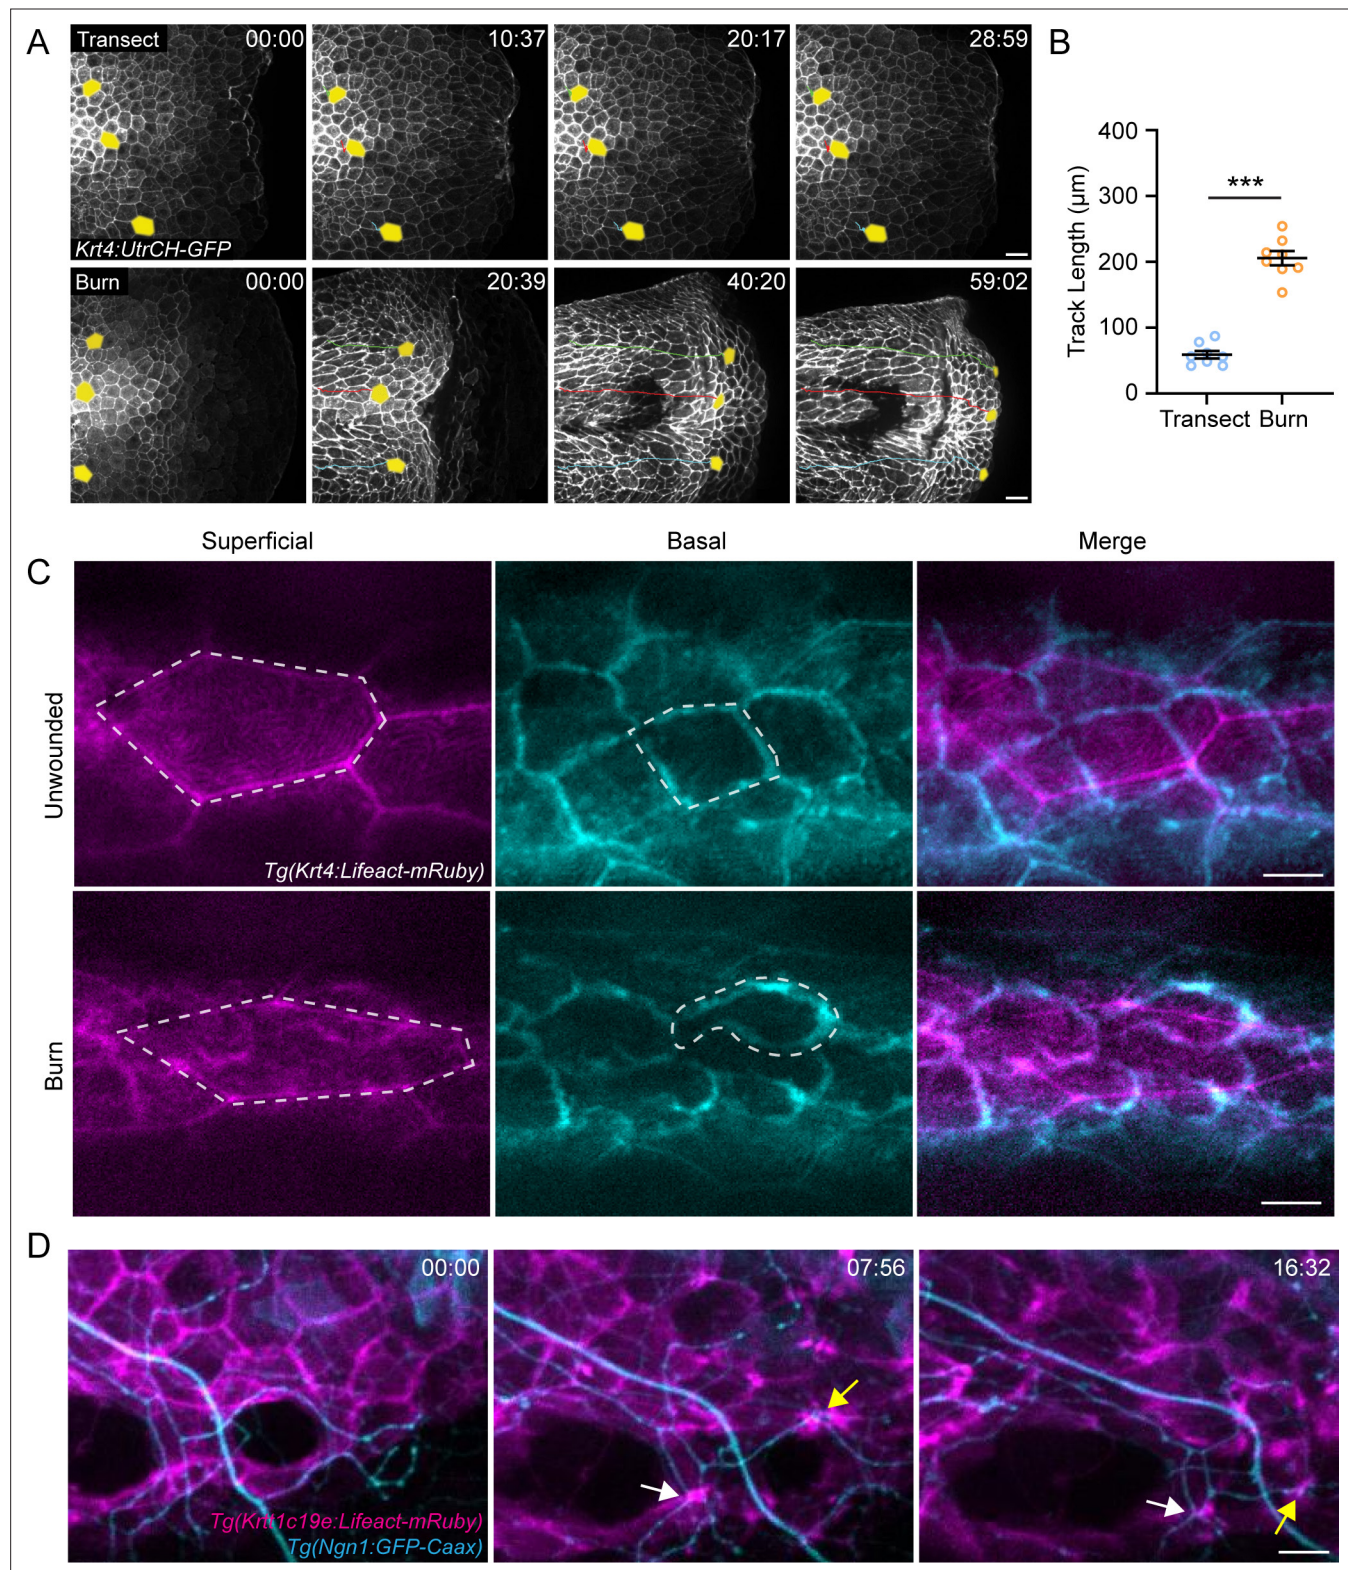

**Figure 3.** Burn injury induces coordinated keratinocyte and sensory axon movement. **(A)** Confocal max-projected time-series images of *Tg(Krt4:UtrCH-GFP)* larvae after either transection or burn injury. Yellow pseudocolored cells and colored tracks highlight keratinocyte displacement. Scale bar = 20  $\mu\text{m}$ . **(B)** Quantification of keratinocyte movement distance over 1 hr post-wound (hpw).  $N = 8$  larvae each collected from three replicates. **(C)** Confocal max-projected images of superficial and basal keratinocytes in *Tg(Krt4:Lifeact-mRuby)* labeled larvae. Left, superficial keratinocytes. Middle, basal keratinocytes. Right, merge. Superficial and basal cell images were taken from the same z-stack and pseudocolored to match the appropriate cell

Figure 3 continued on next page

*Figure 3 continued*

layer. Dashed lines outline one individual keratinocyte. Scale bar = 10  $\mu\text{m}$ . **(D)** Confocal max-projected time-series images of sensory axons and basal keratinocytes in dual-labeled *Tg(Krt4:Lifeact-mRuby); Tg(Ngn1:GFP-Caax)* larvae unwounded or after burn. Arrows highlight coincident movement between keratinocytes and associated sensory axons. Unless otherwise stated, scale bar = 20  $\mu\text{m}$ . \*\*\* $p < 0.001$ .



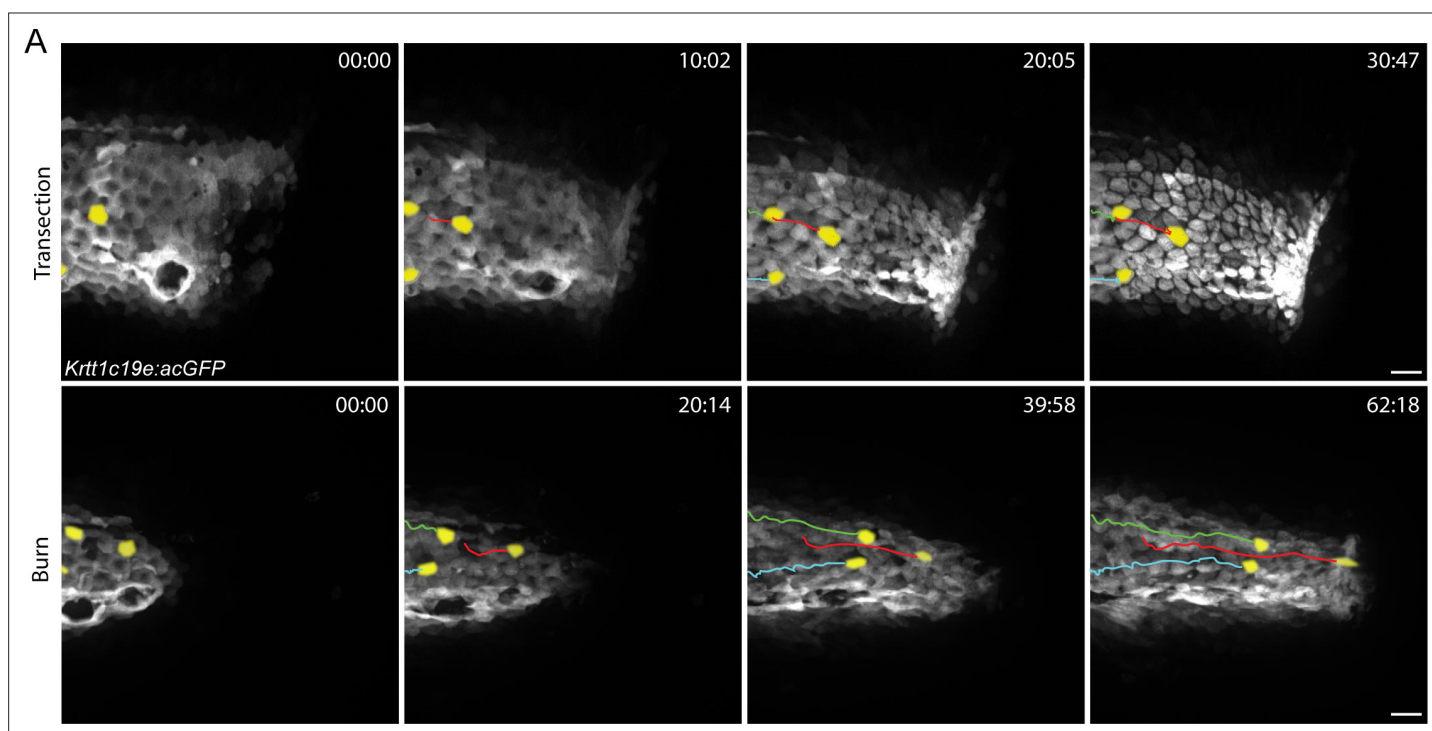

**Figure 3—figure supplement 1.** Basal keratinocyte migration in response to injury. **(A)** Confocal time series of basal keratinocyte, *Tg(Krtt1c19e:acGFP)*, movement after the indicated injury. Yellow pseudocolored cells highlight keratinocyte displacement. Scale bars = 20  $\mu$ m.

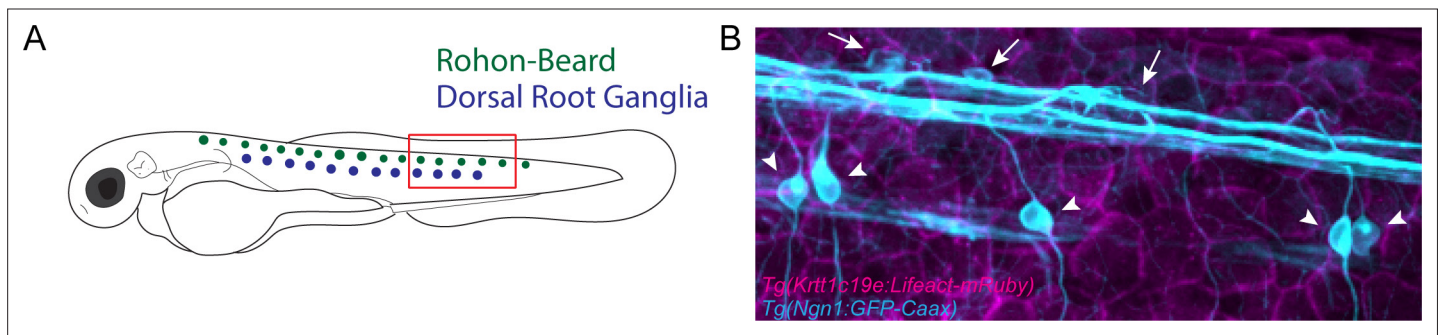

**Figure 3—figure supplement 2.** Sensory axon cell bodies are not displaced following burn injury. **(A)** Schematic of Rohon-Beard (RB) (green) and dorsal root ganglia (DRG) (blue) soma localization in 3 days post-fertilization (dpf) zebrafish. Red box denotes area in which the image shown in B was acquired. **(B)** Representative confocal max-projected image of intact RB and DRG somas 24 hr post-wound (hpw) in a *Tg(Ngn1:GFP-Caax); Tg(Krtt1c19e:Lifeact-mRuby)* dual-labeled larva. Arrows denote RB somas, while arrowheads indicate DRG somas. Soma position was unchanged compared to pre-wounding.

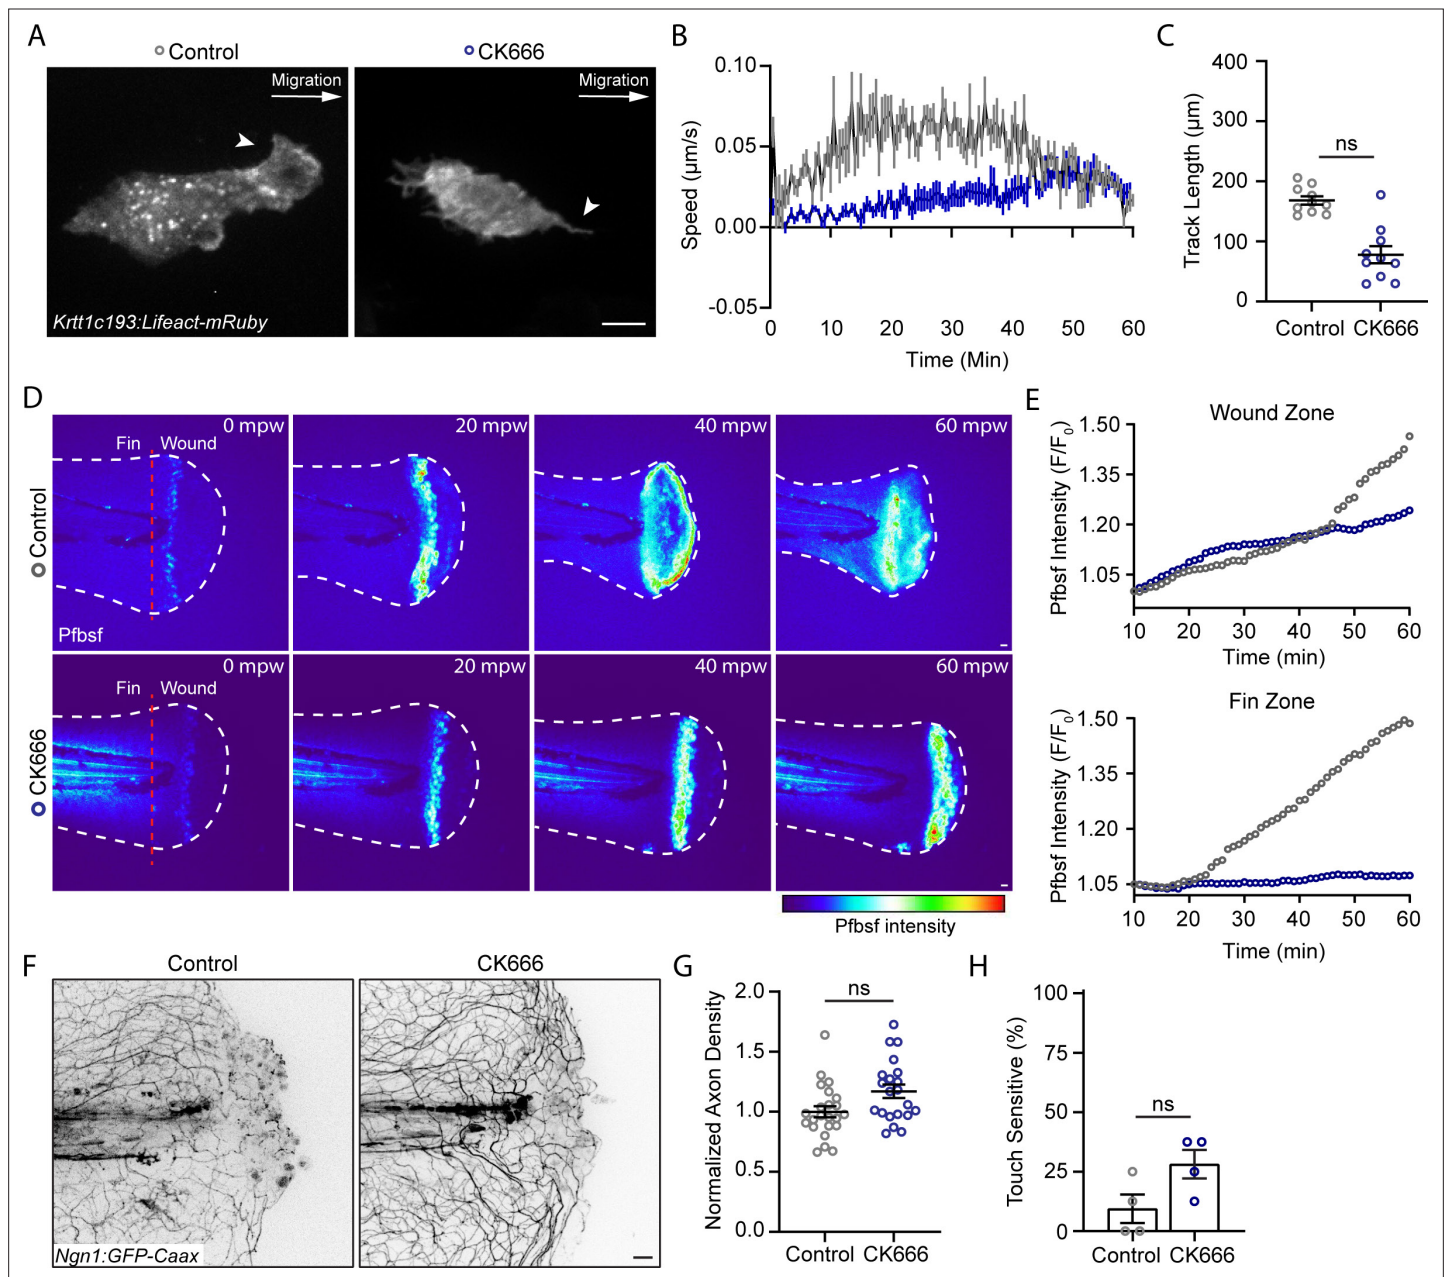

**Figure 4.** The Arp 2/3 inhibitor CK666 impairs early keratinocyte movement and alters the spatial distribution of reactive oxygen species signaling. (A) Confocal max-projected images of control or CK666-treated transiently injected *Tg(Krtt1c19e:Lifeact-mRuby)* larvae. Arrows point to lamellipodia in the control larva, and lack of lamellipodia in the CK666-treated larva. Scale bar = 10  $\mu\text{m}$ . (B) Plot of keratinocyte speed over 1 hr post-wound (hpw) as treated in A. N = 10 larvae each collected from three replicates. (C) Plot of keratinocyte distance moved over 1 hpw as treated in A. N = 10 larvae each collected from three replicates. (D) Confocal sum-projected time-series images of hydrogen peroxide level (pentafluorobenzenesulfonyl fluorescein [Pfbfsf] intensity) in 1 larva over 1 hpw in the indicated treatment. (E) Quantification of Pfbfsf intensity in the wound or fin area of the represented larva after burn injury as treated in D over 1 hpw. N = 1 representative larva per condition. (F) Confocal max-projected images of sensory axons 24 hpw in larvae wounded in control medium or CK666. (G) Quantification of axon density 24 hpw in larvae treated as in J. N > 22 larvae per condition from four replicates. (H) Quantification of sensory perception 24 hpw in larvae treated as in J. N = 32 larvae per condition from four replicates. Unless otherwise specified, scale bars = 20  $\mu\text{m}$ . ns = not significant.



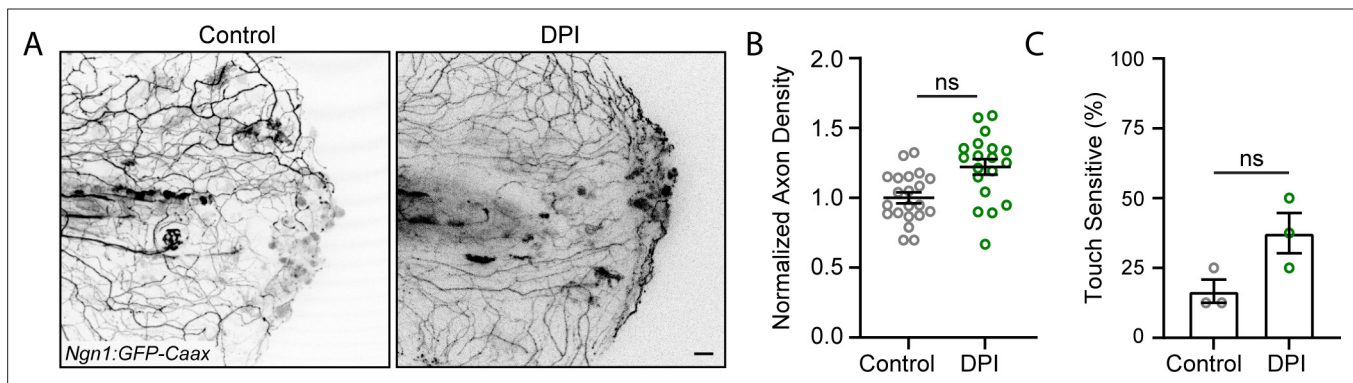

**Figure 4—figure supplement 1.** Early reactive oxygen species (ROS) inhibition is not sufficient to improve axon regeneration. **(A)** Confocal max-projected images of sensory axons treated with diphenyleneiodonium (DPI). **(B)** Quantification of axon density 24 hr post-wound (hpw).  $N > 19$  larvae per condition from three replicates. **(C)** Quantification of sensory perception 24 hpw.  $N = 24$  larvae each from three replicates. Scale bar = 20  $\mu\text{m}$ . ns = not significant.

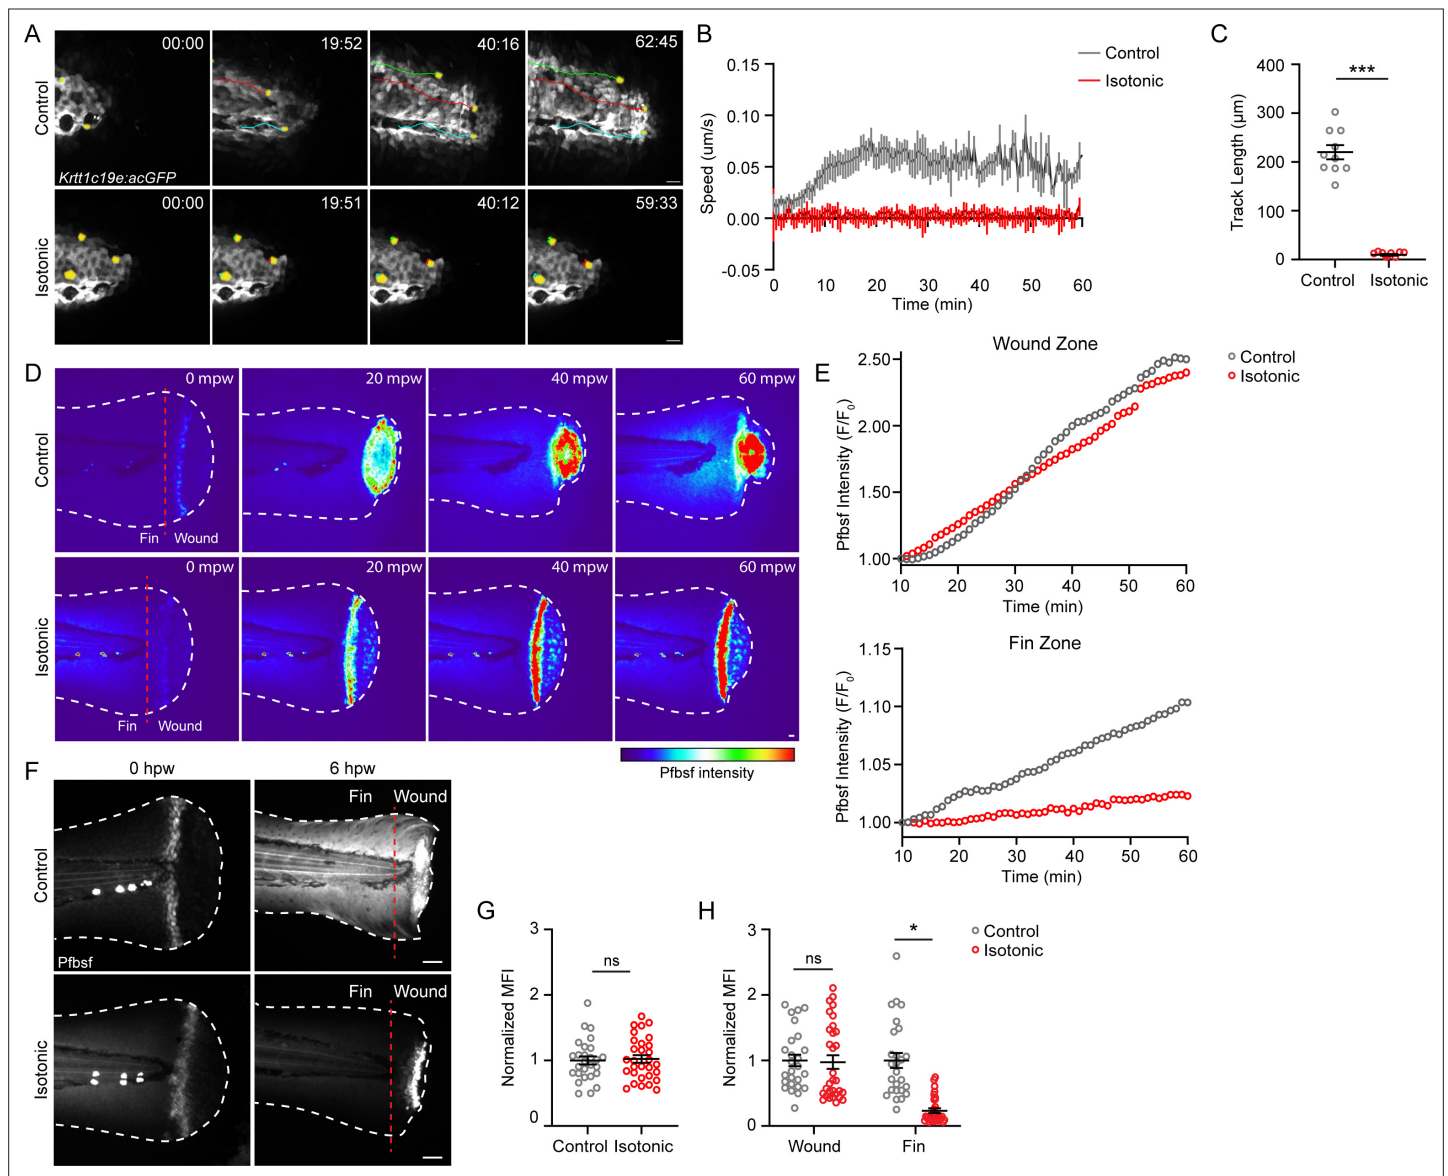

**Figure 5.** Treatment with isotonic solution inhibits keratinocyte migration and dampens reactive oxygen species (ROS) signaling. **(A)** Confocal time-series images of basal keratinocyte movement in *Tg(Krtt1c19e:acGFP)* larvae over 1 hr post-wound (hpw) after burn injury in the indicated treatment. **(B)** Plot of basal keratinocyte average speed over 1 hpw treated as in A. N = 10 larvae per condition collected from three replicates. **(C)** Distance of keratinocyte movement over 1 hpw treated as in A. N = 10 larvae per condition collected from three replicates. **(D)** Confocal sum-projected, heat-mapped time-series images of hydrogen peroxide level (pentafluorobenzenesulfonyl fluorescein [Pfbfsf] intensity) over 1 hpw as treated in A. **(E)** Quantification of Pfbfsf intensity in the wound or fin area of the represented larva after burn injury as treated in D over 1 hpw. N = 1 representative larva per condition. **(F)** Confocal sum-projected images of Pfbfsf intensity in the fin and wound zone either 0 or 6 hr following burn injury. Dashed red line denotes the boundary between the wound area and distal fin tissue. Scale bar = 50  $\mu$ m. **(G)** Quantification of mean Pfbfsf fluorescence intensity (MFI) immediately (0 hpw) after burn injury normalized to the control condition. N>27 larvae per condition from three replicates. **(H)** Quantification of MFI 6 hpw in the indicated region of the fin normalized to the control condition. N>26 larvae per condition from three replicates. Unless otherwise indicated, scale bars = 20  $\mu$ m. \*p<0.05, \*\*\*p<0.001, ns = not significant.

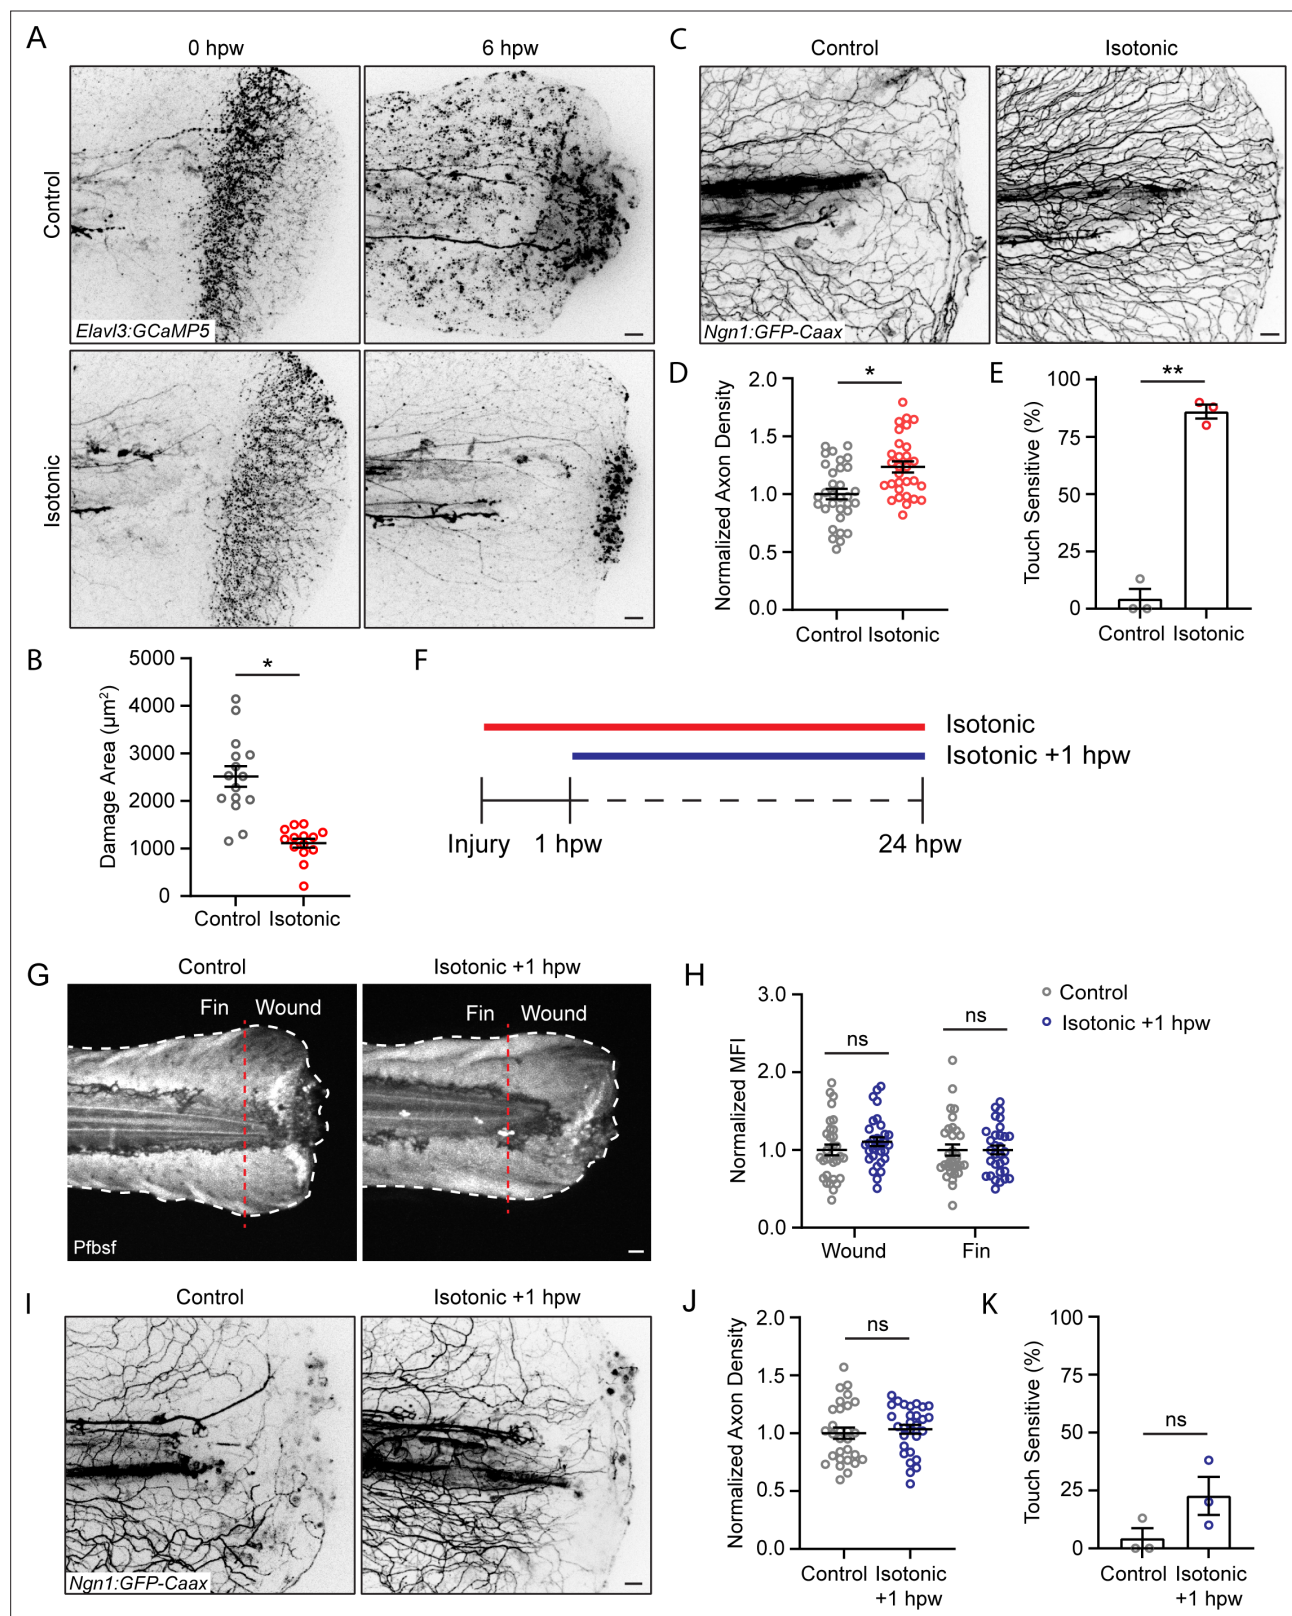

**Figure 6.** Isotonic treatment improves axon regeneration. (A) Confocal max-projected images of axon damage in control or isotonic-treated *Tg(Elavl3:GCaMP5)* larvae 0 or 6 hr post-wound (hpw). (B) Quantification of axon damage in control and isotonic-treated burned fins at 6 hpw as treated in A. N = 16 larvae per condition from three replicates. (C) Confocal max-projected images of sensory axons in larvae 24 hpw as treated in A. (D) Quantification of axon density 24 hpw in larvae treated as depicted in C. N > 30 larvae per condition from three replicates. (E) Quantification of touch sensitivity 24 hpw in larvae treated as depicted in C. (F) Experimental timeline diagram. Injury occurs at 0 hpw. Larvae are treated with Isotonic (red bar) or Isotonic + 1 hpw (blue bar) from 1 hpw to 24 hpw. (G) Confocal max-projected images of sensory axons in larvae 24 hpw as treated in A. (H) Quantification of normalized mean fluorescence intensity (MFI) 24 hpw in larvae treated as depicted in G. N > 30 larvae per condition from three replicates. (I) Confocal max-projected images of sensory axons in larvae 24 hpw as treated in A. (J) Quantification of axon density 24 hpw in larvae treated as depicted in I. N > 30 larvae per condition from three replicates. (K) Quantification of touch sensitivity 24 hpw in larvae treated as depicted in I. ns indicates no significant difference. Figure 6 continued on next page



*Figure 6 continued*

sensory perception 24 hpw in larvae treated as in C. N = 24 larvae each from three replicates. **(F)** Schematic illustrating the different isotonic treatment paradigms that are being compared. **(G)** Confocal sum-projected images of pentafluorobenzenesulfonyl fluorescein [Pfbsf] intensity in control and isotonic +1 hpw treated burned larvae. Dashed red line denotes the boundary between the wound area and distal fin tissue. White dashed line denotes the fin. **(H)** Quantification of mean Pfbsf fluorescence intensity (MFI) 6 hpw in the indicated region of the fin normalized to the control condition. N = 31 larvae per condition from three replicates. **(I)** Confocal max-projected images of sensory axons 24 hpw in burned control or isotonic-treated larvae starting 1 hpw. **(J)** Quantification of axon density 24 hpw in larvae treated as in D. N = 29 larvae per condition from three replicates. **(K)** Quantification of sensory perception 24 hpw in larvae treated as in D. N = 24 larvae per condition from three replicates. Unless otherwise indicated, scale bars = 20  $\mu$ m. \* $p < 0.05$ , \*\* $p < 0.01$ , ns = not significant.

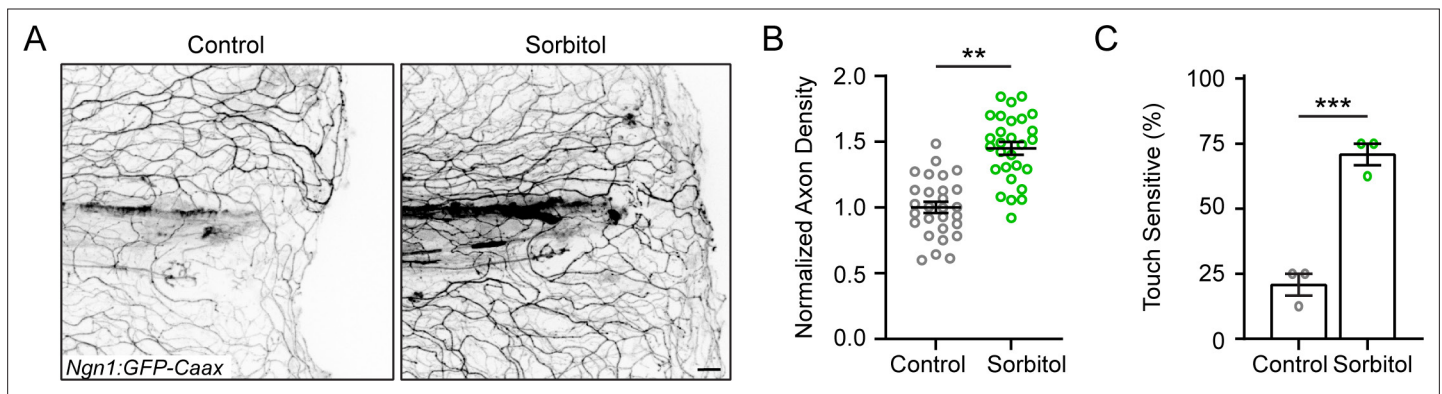

**Figure 6—figure supplement 1.** Keratinocyte movement after injury and effect of D-Sorbitol on sensory axon regeneration. **(A)** Representative max-projected confocal images of sensory axons in control and isotonic D-Sorbitol-treated larvae 24 hr post-wound (hpw). **(B)** Quantification of axon density in wounded tissue 24 hpw. N = 28 larvae each from four replicates. **(C)** Quantification of sensory perception 24 hpw. N = 24 larvae each collected from four replicates. Scale bar = 20  $\mu$ m. \*\* $p < 0.01$ , \*\*\* $p < 0.001$ .

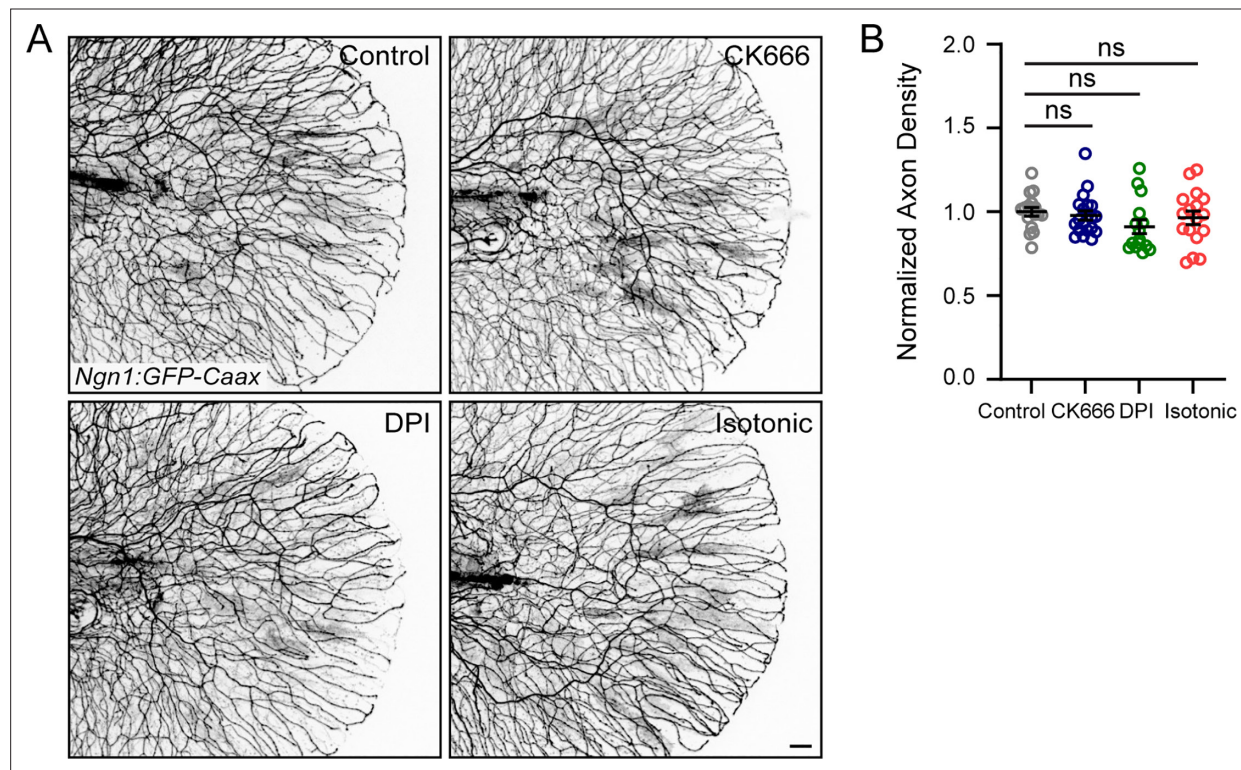

**Appendix 1—figure 1.** Drug treatments do not affect axon density in unwounded larvae. **(A)** Representative max-projected confocal images of sensory axons in unwounded, drug-treated 4 dpf larvae. **(B)** Quantification of axon density in larvae treated as stated in E.  $N > 15$  larvae each from 3 replicates. Scale bar = 20  $\mu\text{m}$ . ns = not significant.
