# Supplementary material for: Damage-induced basal epithelial cell migration modulates the spatial organization of redox signaling and sensory neuron regeneration
Source: eLife. 2024 Aug 29;13:RP94995. doi: 10.7554/eLife.94995 (PMC11361710; doi:10.7554/eLife.94995)
Supplement: Source data 1. [file elife-94995-data1.xlsx]

## Sheet: Sheet1
Krtt1c19e Lifeact Ruby F	ATCGgatcCACCGGTATGGGTGTCGCAGATTTGATCA
Krtt1c19e Lifeact Ruby R	GCGGCCGCGGTGGCGTTAAGCGCCTGTGCTATGTCTGC
